# Supplementary material
Source: PubMed Central journal article supplement (PMC8486805)
Supplement: 41422_2021_545_MOESM1_ESM.pdf [file 41422_2021_545_MOESM1_ESM.pdf]

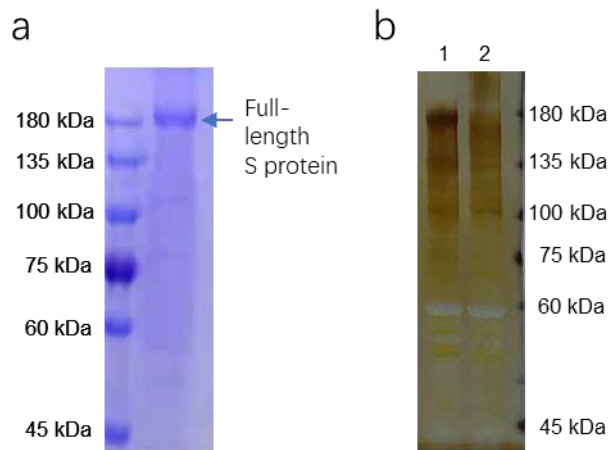

**Fig. S1. Gel images of the S protein of SARS-CoV-2**

a. SDS-PAGE gel of the S protein expressed in human embryonic kidney 293T cells. The band of the full-length of S protein is indicated by blue arrow.

b. Silver staining gel of the S protein extracted from virions. Lane 1, purified SARS-CoV-2 virus; Lane 2, purified SARS-CoV-2 virus treated with PNGase F. The band close to the 180 kDa in lane 1 is the S protein.

**N17**

Sample = SARS-COV-2 Virus S \_ Lytic\_ full\_309N 2021-4-11

Sequence = QCVNLT; Mods = NGLYcan/1548.5448/HexNAc(3)Hex(4)NeuAc(1)

z=2

Error (ppm) = -1.53

Retention Time (min) = 81.02

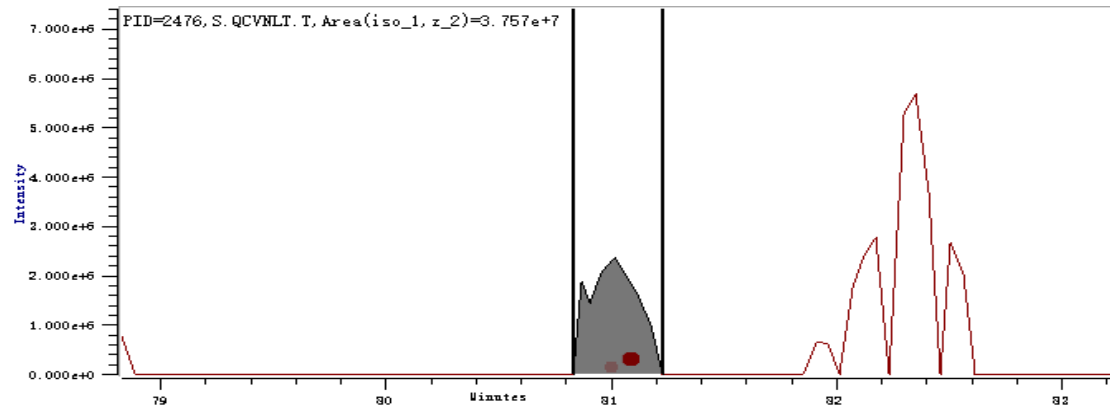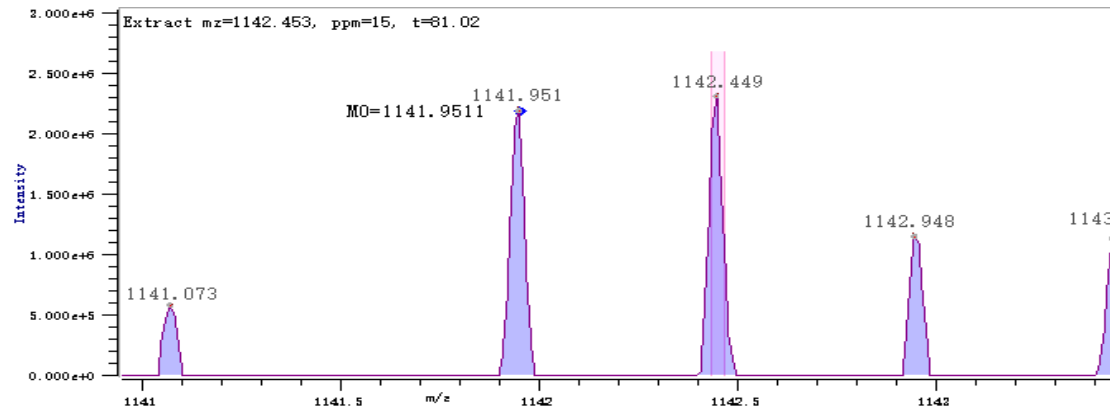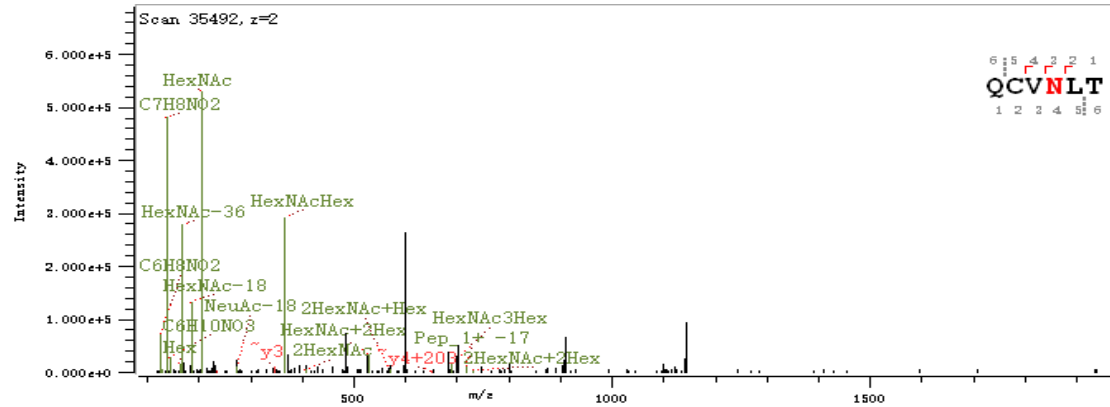

N61

Sample = SARS-COV-2 Virus S \_ chymotrypsin\_ full\_309N 2021-4-11

Sequence = FSNVTW; Mods = NGlycan/1378.4757/HexNAc(2)Hex(6)

z=2

Error (ppm) = 0.51

Retention Time (min) = 60.15

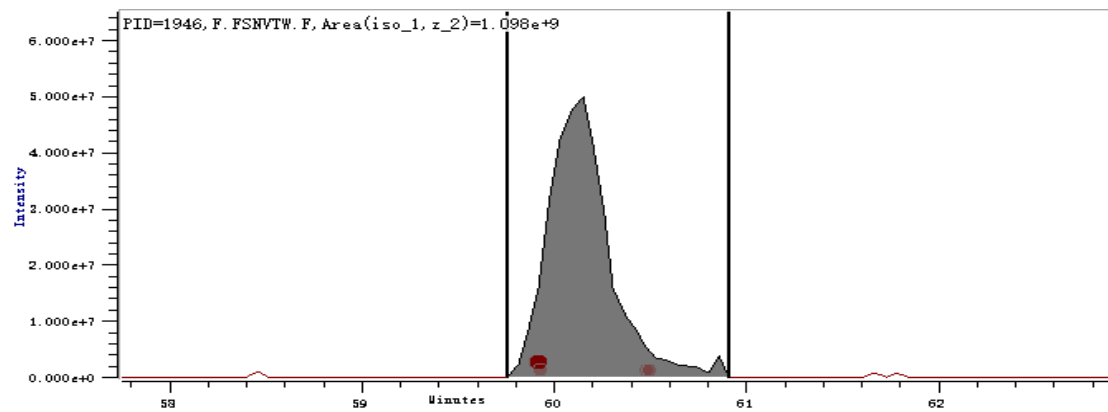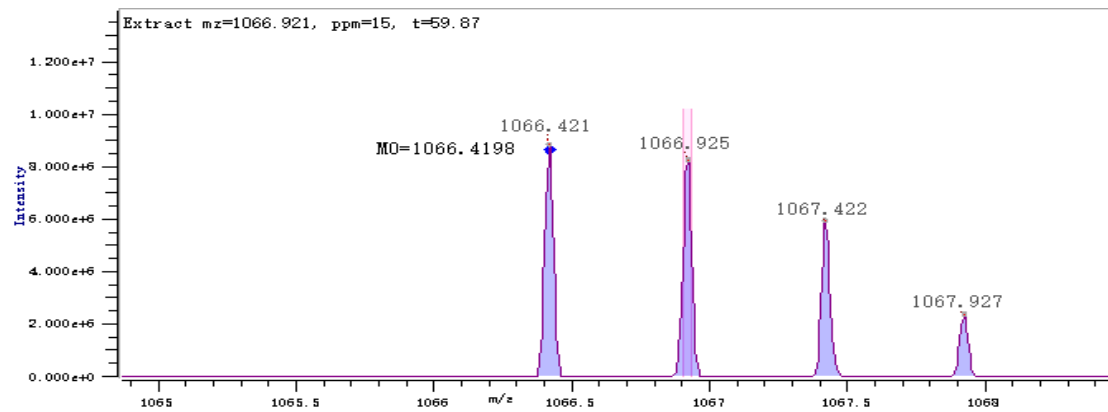



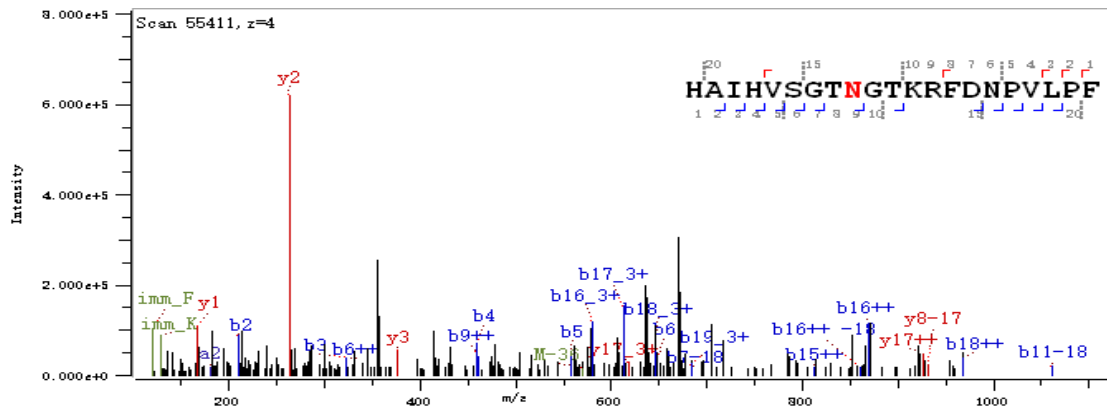

**N122**

Sample = SARS-COV-2 Virus S\_trypsin\_full\_309N 2021-4-11

Sequence = TQSLIVN~~N~~ATNVVIK; Mods = NGLycan/1540.5285/HexNAc(2)Hex(7)

z=2

Error (ppm) = 2.73

Retention Time (min) = 100.26

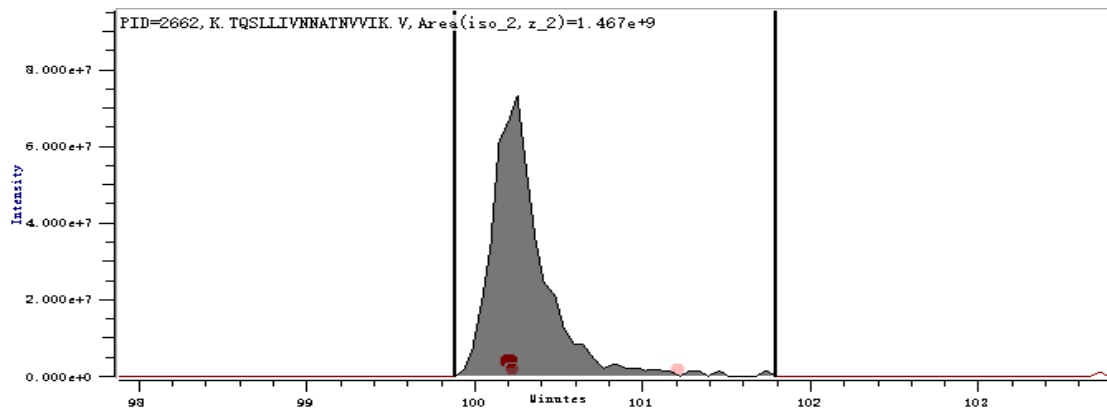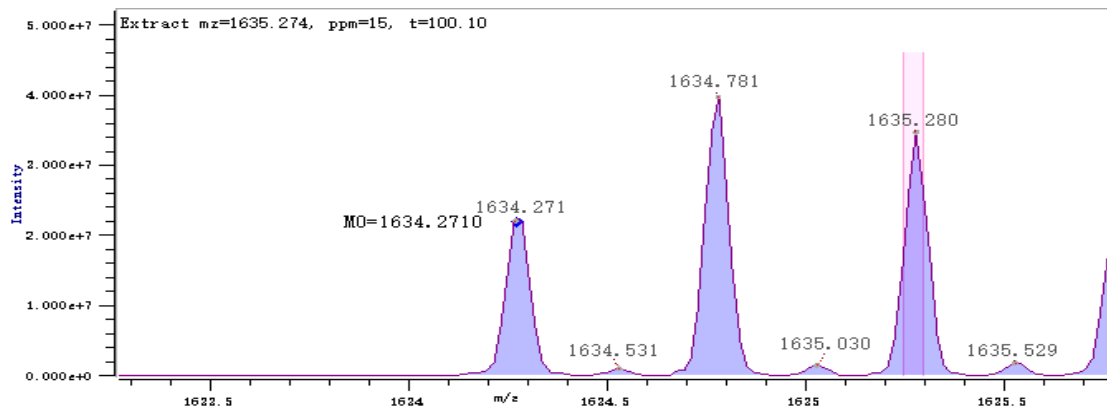

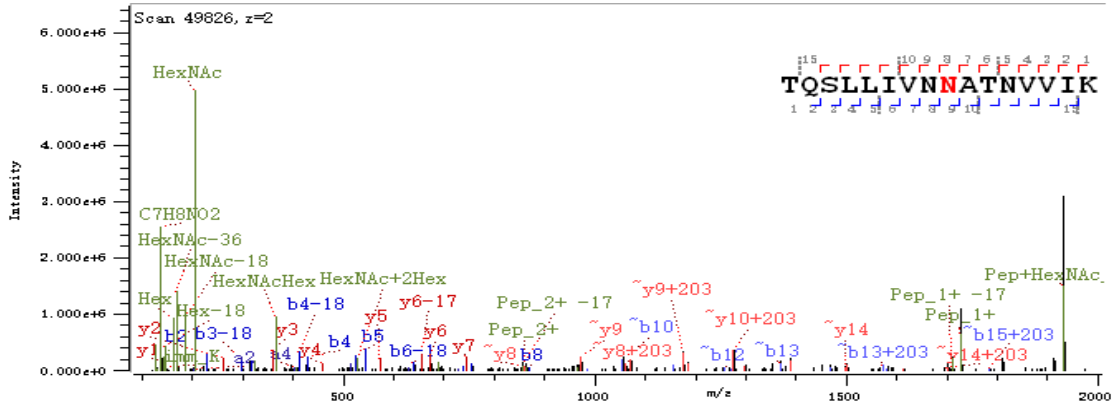

**N149**

Sample = SARS-COV-2 Virus S\_ chymotrypsin\_ full\_309N 2021-4-11

Sequence = HKNNKSWMESEF; Mods = NGLycan/1971.7189/HexNAc(5)Hex(5)Fuc(1)

z=4

Error (ppm) = -0.59

Retention Time (min) = 20.14

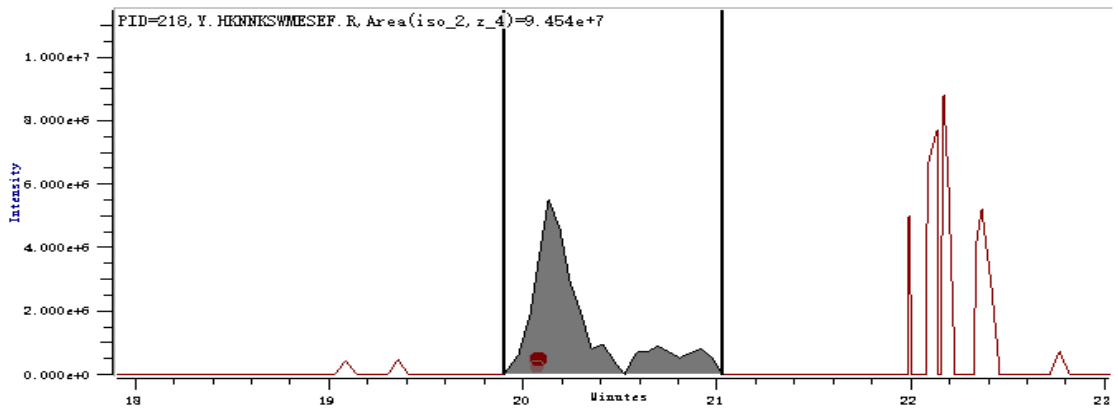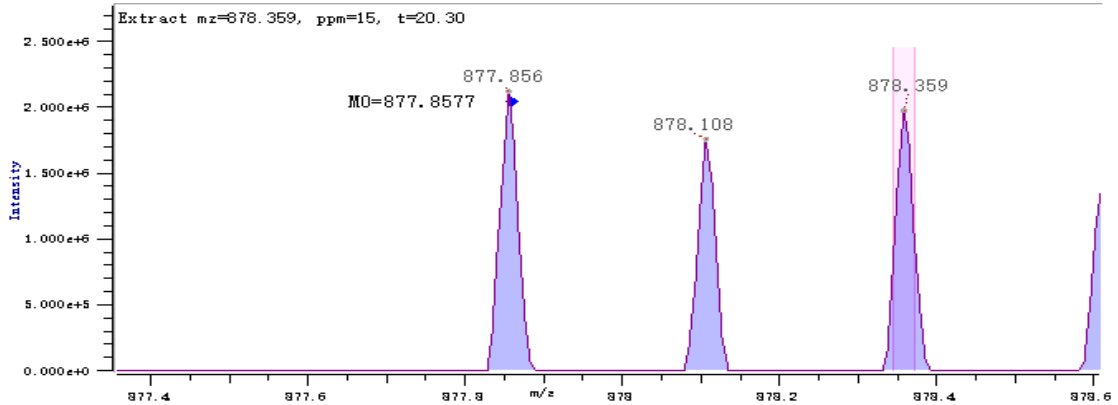

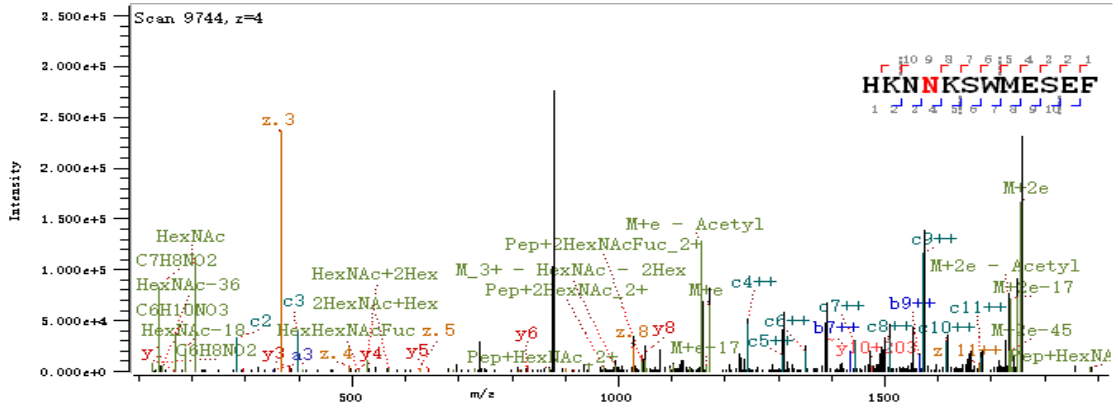

**N165**

Sample = SARS-COV-2 Virus S\_ chymotrypsin\_ full\_309N 2021-4-11

Sequence = SSANNCTF; Mods = NGlycan/1971.7189/HexNAc(5)Hex(5)Fuc(1)

z=3

Error (ppm) = -0.70

Retention Time (min) = 18.48

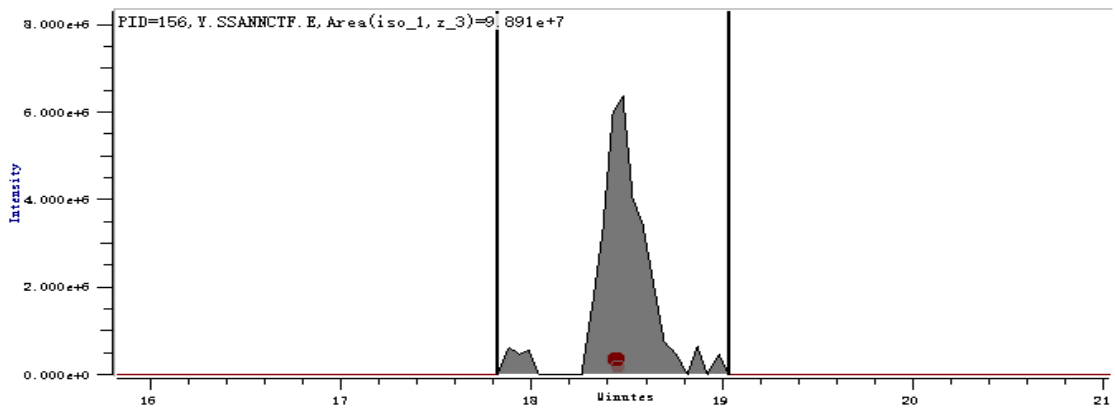

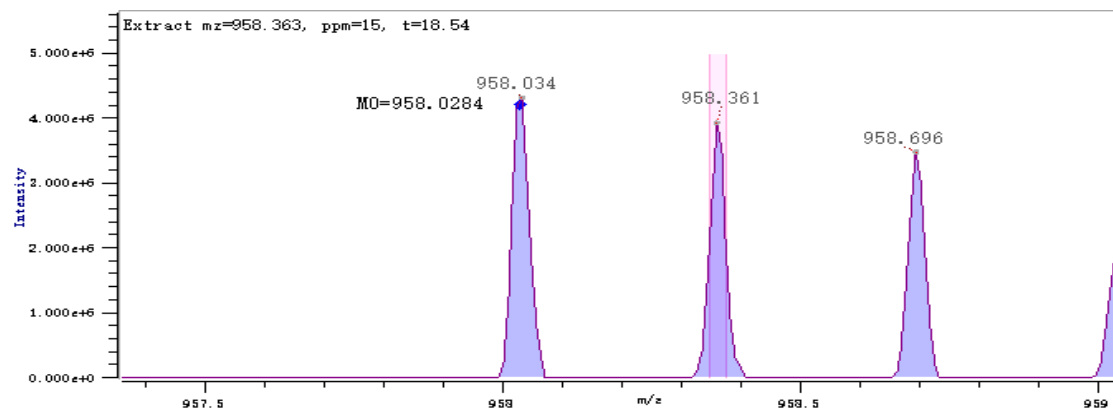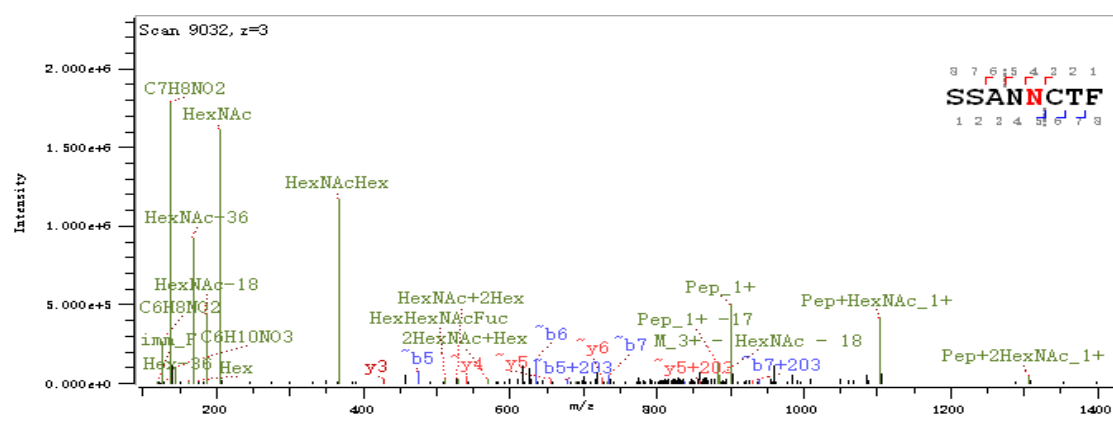

**N234**

Sample = SARS-COV-2 Virus S\_ chymotrypsin\_ full\_309N 2021-4-11

Sequence = SALEPLVDLPIGINITRF; Mods = N Glycan/1864.6342/HexNAc(2)Hex(9)

z=3

Error (ppm) = 0.11

Retention Time (min) = 142.03



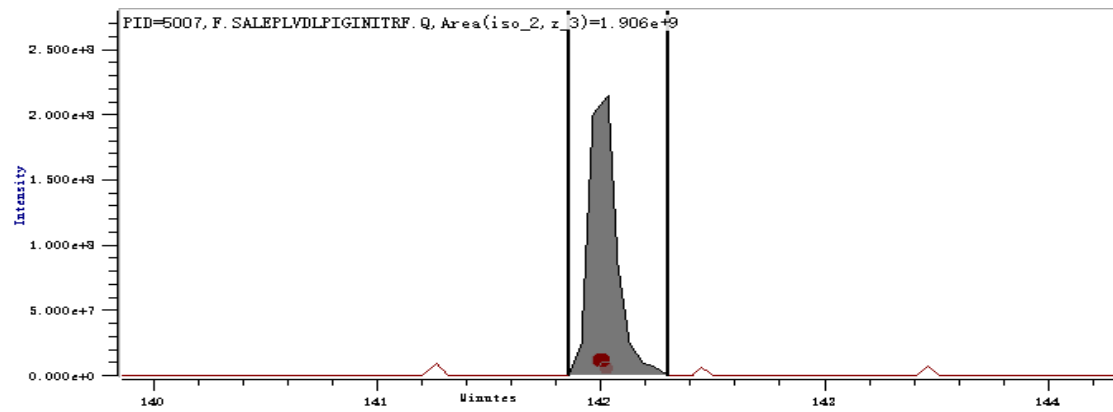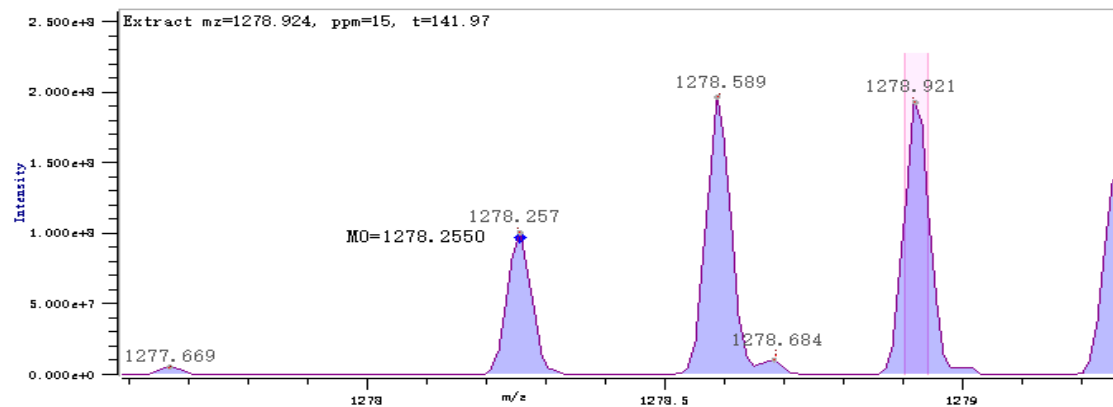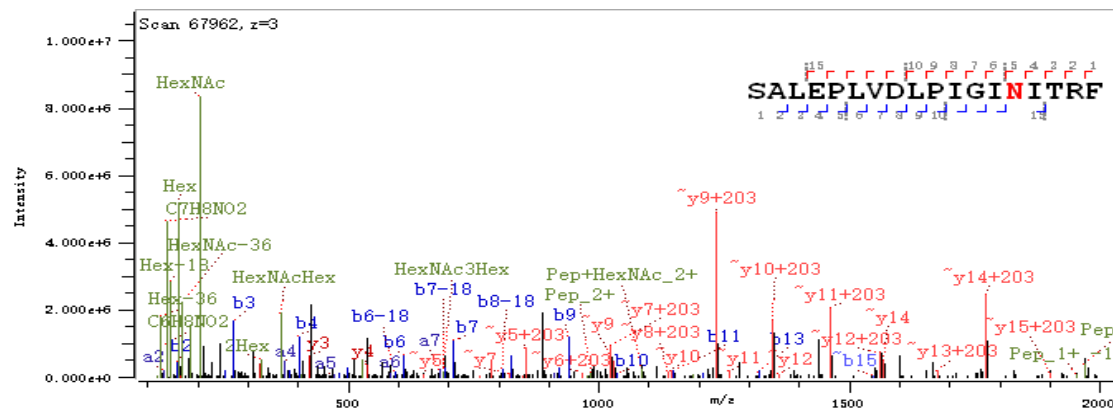

**N282**

Sample = SARS-COV-2 Virus S\_trypsin\_full\_309N 2021-4-11

Sequence = YNENGITDAVDCALDPLSETK; Mods = NGlycan/1622.5816/HexNAc(4)Hex(5)

z=3

Error (ppm) = -0.01

Retention Time (min) = 126.59

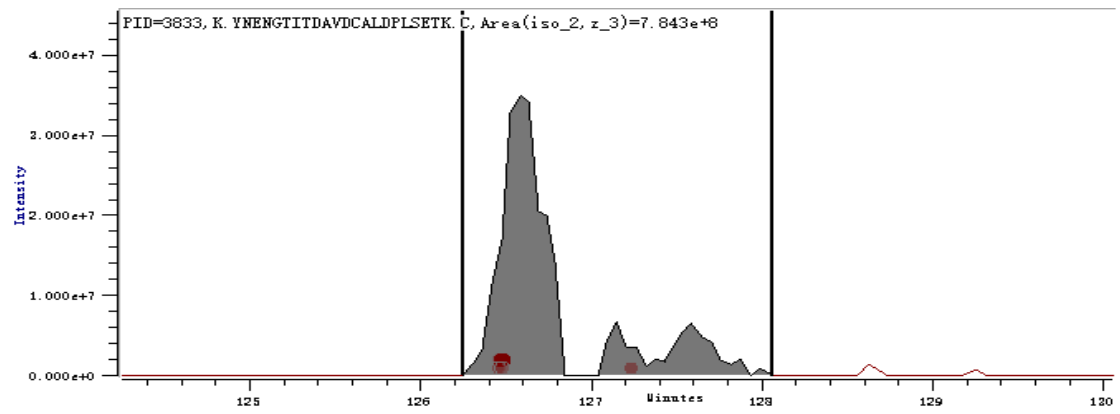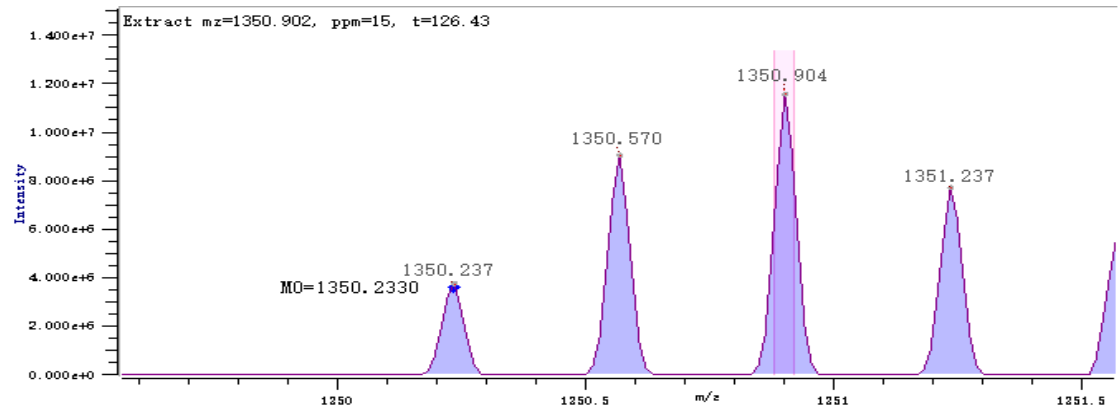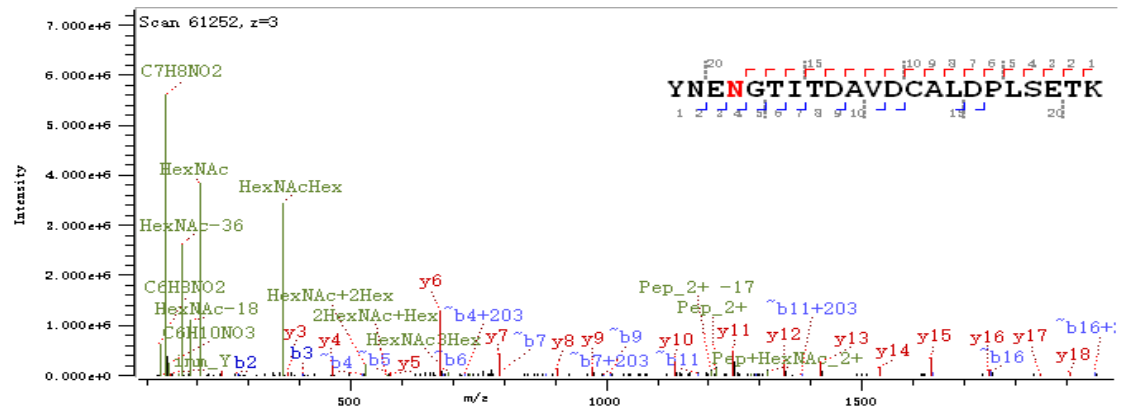

**N331**

Sample = SARS-COV-2 Virus S \_ chymotrypsin\_ full\_309N 2021-4-11

Sequence = RVQPTESIVRFPNITNLCPF; Mods = NGlycan/1825.6610/HexNAc(5)Hex(5)

z=4

Error (ppm) = 1.10

Retention Time (min) = 128.48

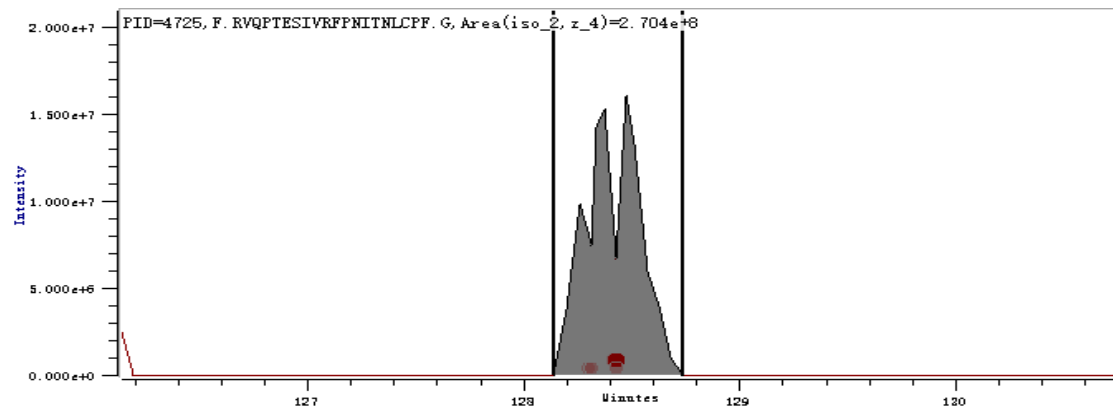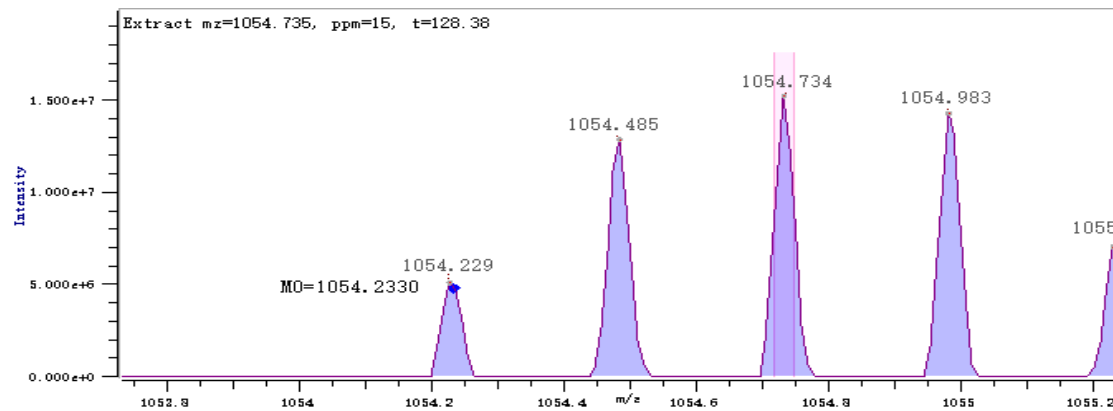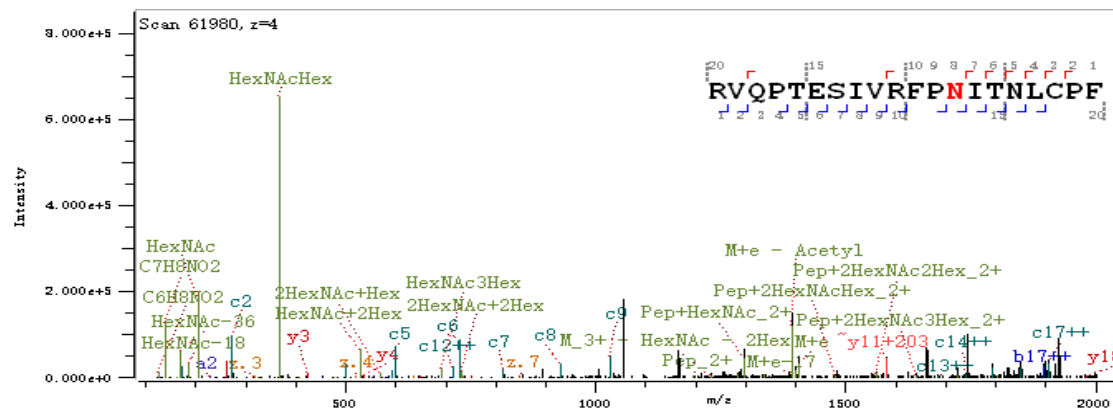

**N343**

Sample = SARS-COV-2 Virus S \_ Lytic\_ full\_309N 2021-4-11

Sequence = NLCPFGEVFNAT; Mods = N Glycan/1216.4229/HexNAc(2)Hex(5)

z=2

Error (ppm) = 0.61

Retention Time (min) = 129.08

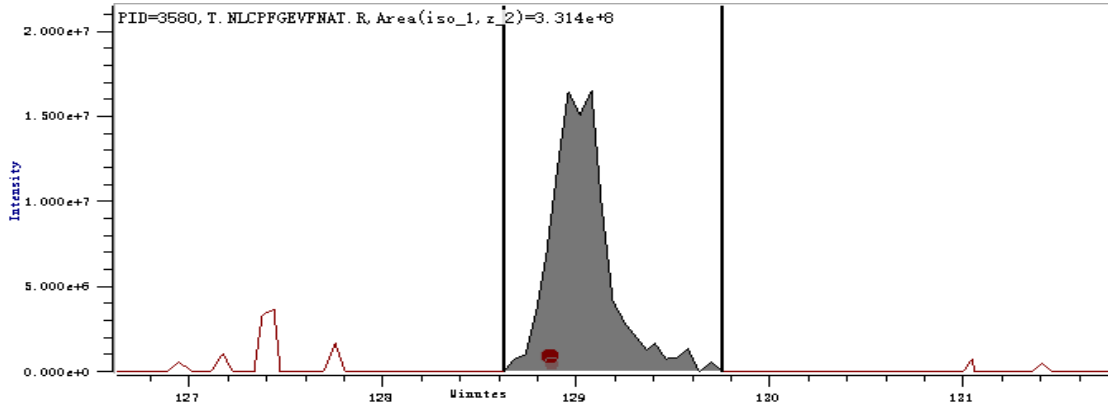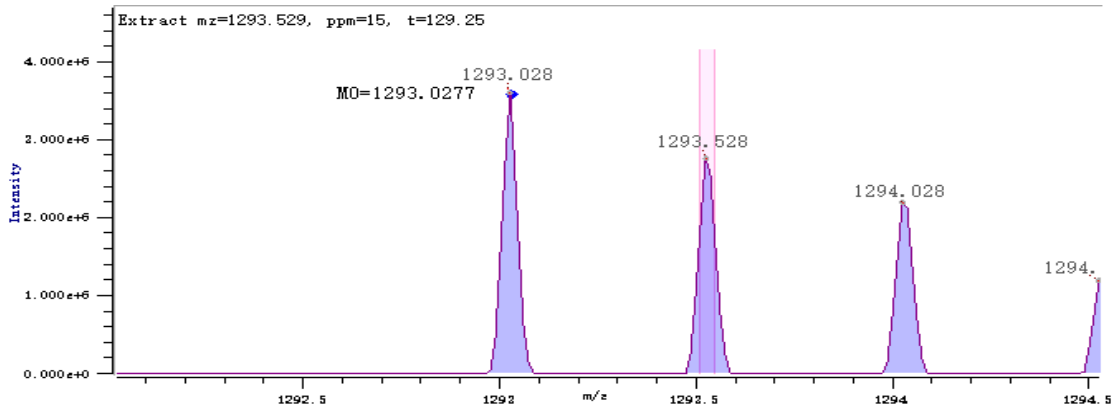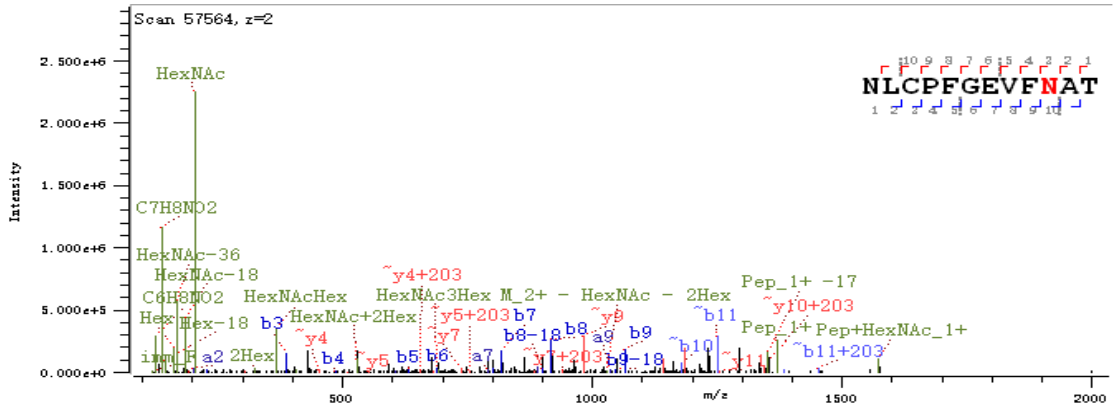

**N603**

Sample = SARS-COV-2 Virus S \_ chymotrypsin \_ full\_309N 2021-4-11

Sequence = GGVSVITPGTNTSNQVAVLY; Mods = NGLycan/1581.5551/HexNAc(3)Hex(6)

z=3

Error (ppm) = -0.18

Retention Time (min) = 120.69

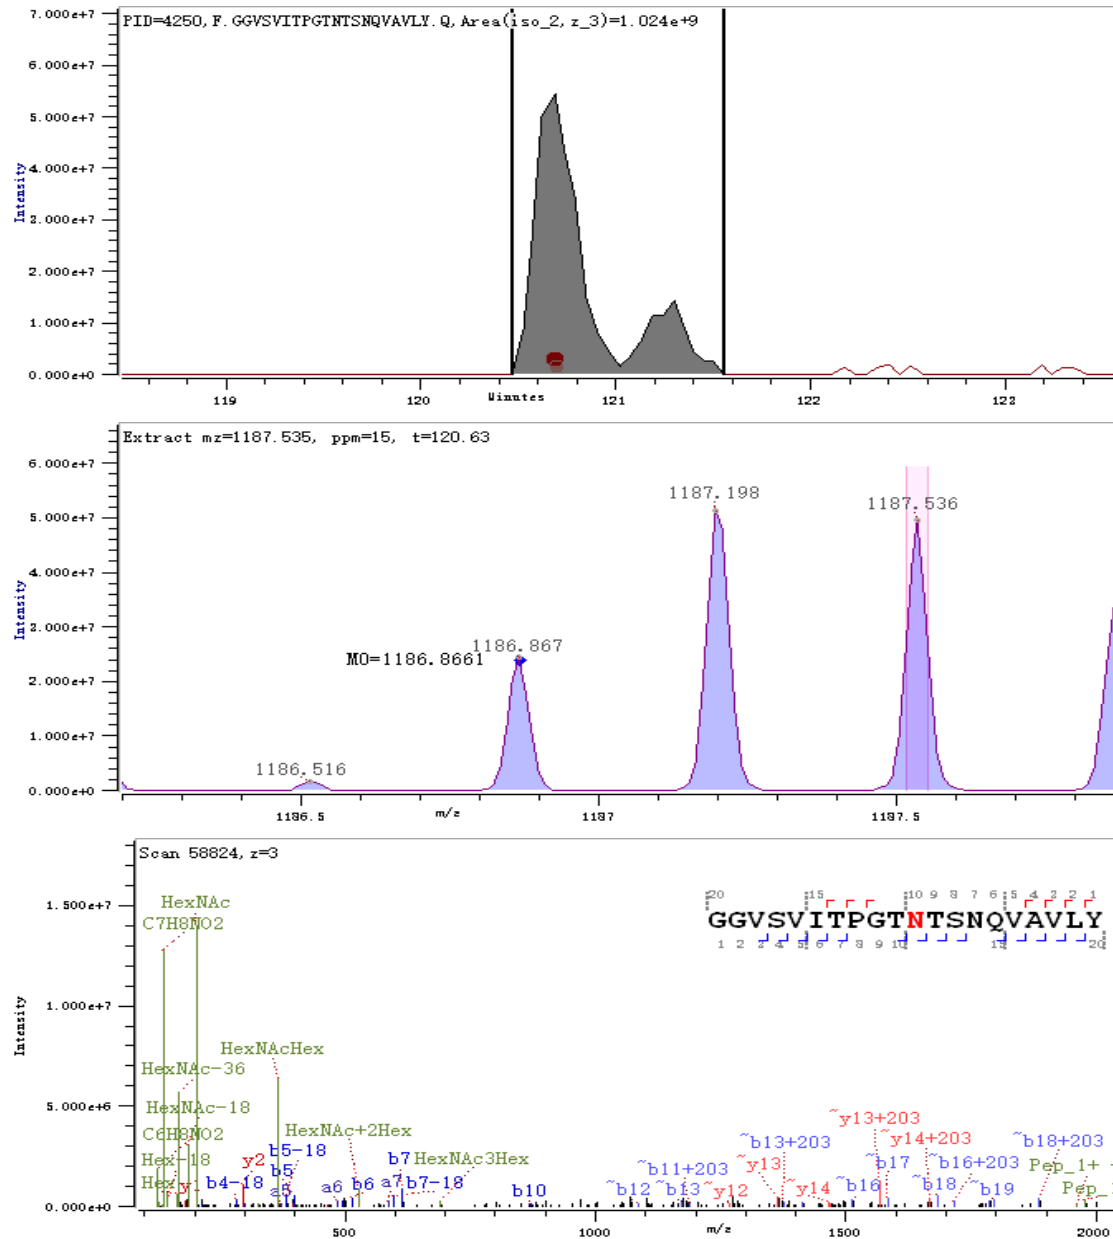

**N616**

Sample = SARS-COV-2 Virus S\_ Lytic\_ full\_309N 2021-4-11

Sequence = LYQDVNCT; Mods = N Glycan/1419.5022/HexNAc(3)Hex(5)

z=2

Error (ppm) = -0.46

Retention Time (min) = 28.97

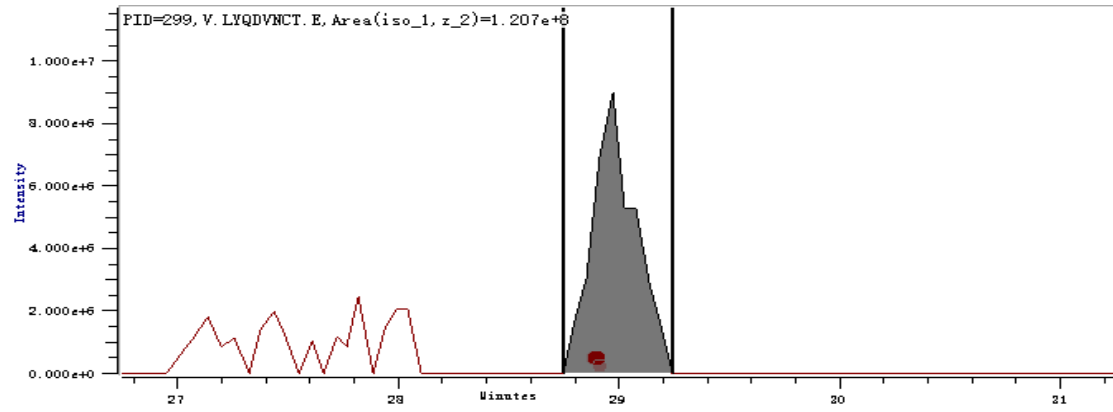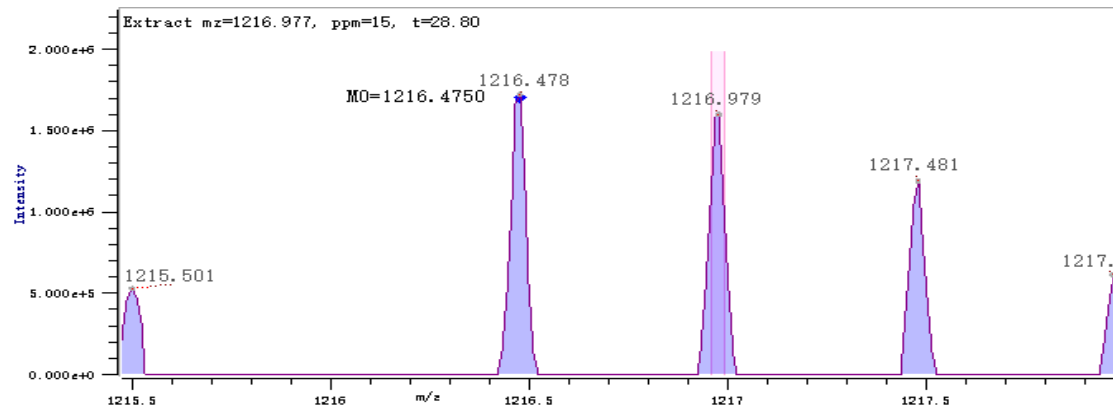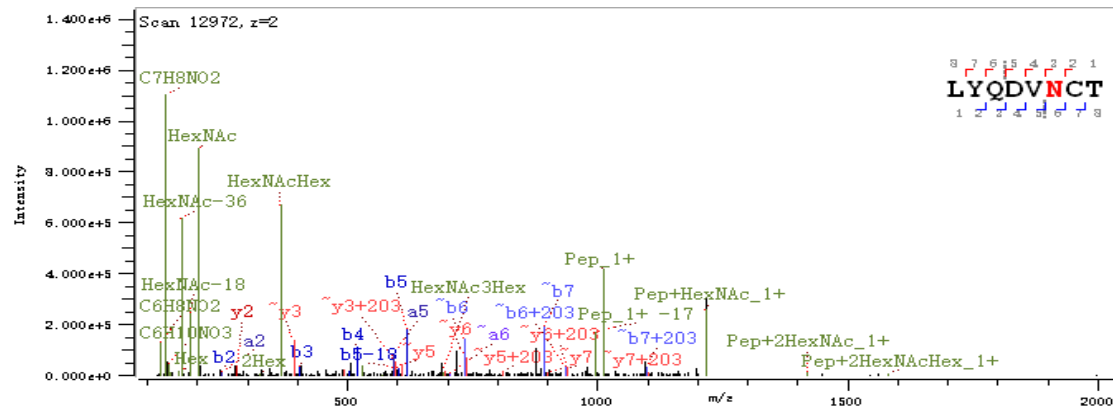

N657

Sample = SARS-COV-2 Virus S\_ chymotrypsin\_ full\_309N 2021-4-11

Sequence = QTRAGCLIGA<sup>EHV</sup>NNSYEC<sup>DI</sup>PIGAGICASY;

Mods = NGlycan/2174.7983/HexNAc(6)Hex(5)Fuc(1)

z=4

Error (ppm) = -1.19

Retention Time (min) = 110.62

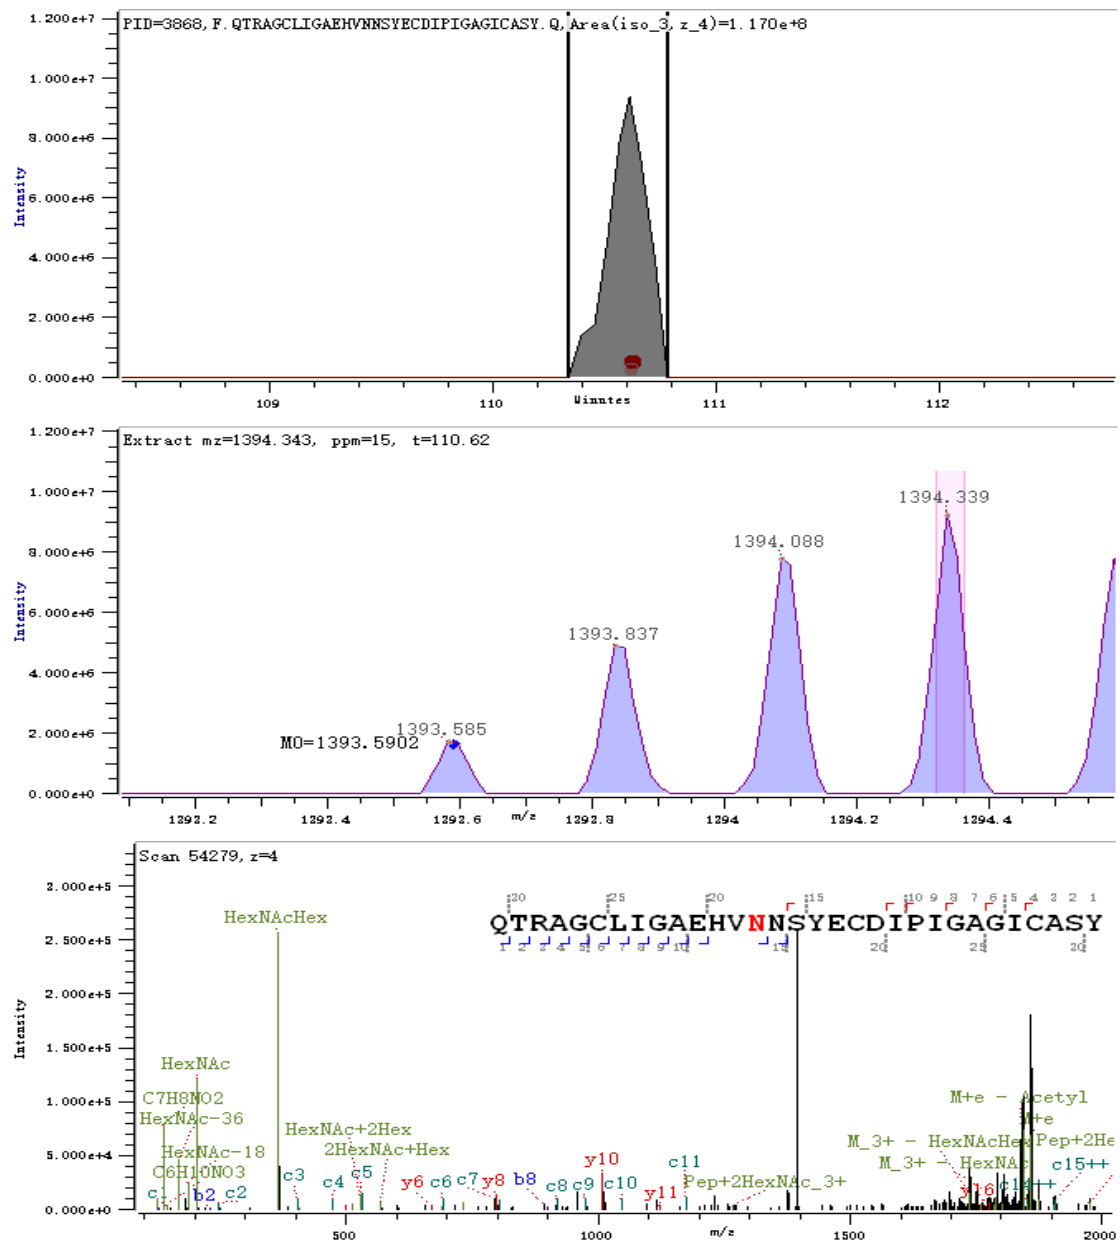





**N717**

Sample = SARS-COV-2 Virus S \_ Lytic\_ full\_309N 2021-4-11

Sequence = NFTISV; Mods = N Glycan/1540.5285/HexNAc(2)Hex(7)

z=2

Error (ppm) = 0.62

Retention Time (min) = 77.54

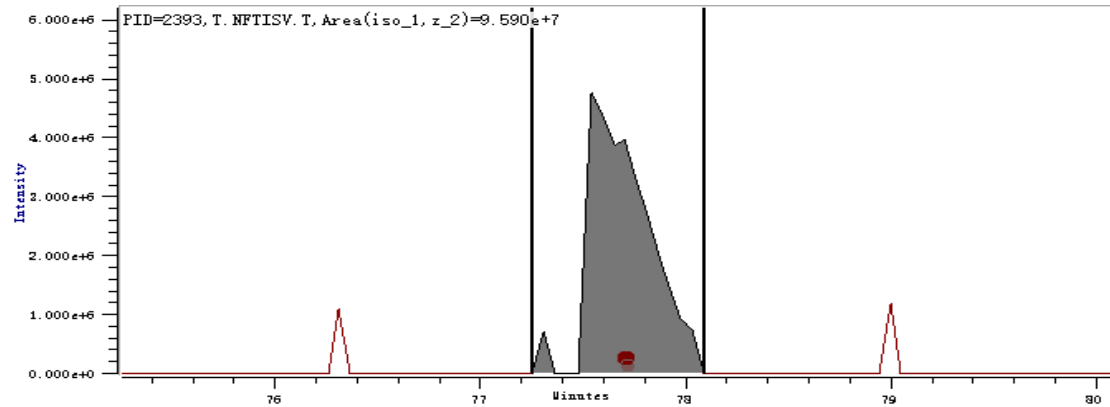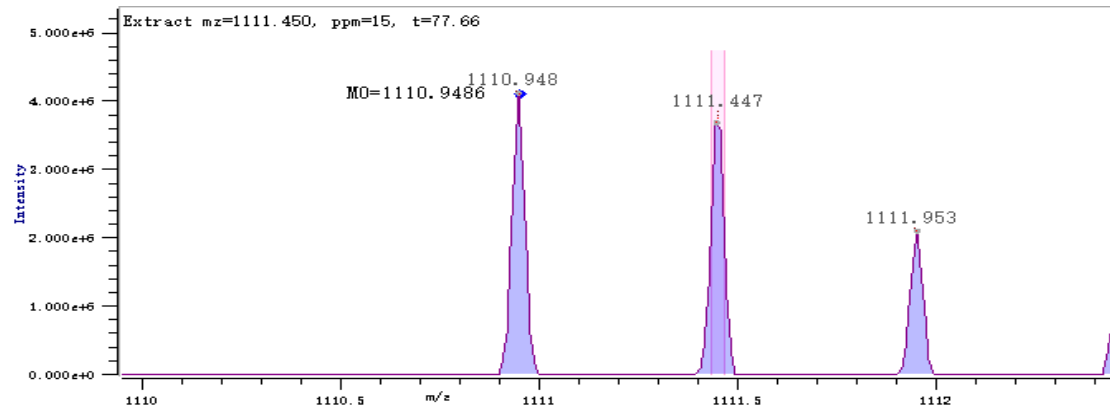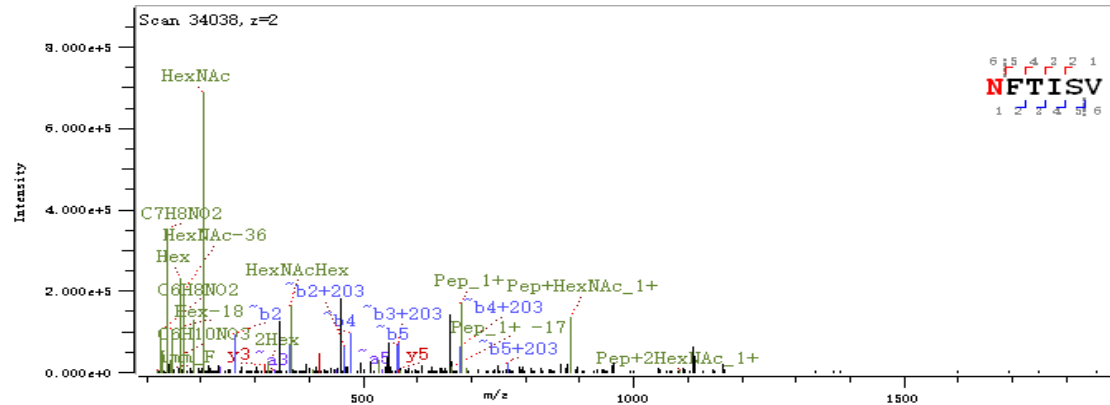



N1074

Sample = SARS-COV-2 Virus S\_trypsin\_full\_309N 2021-4-11

Sequence = NFFTAPAICHDGK; Mods = NGLycan/1540.5285/HexNAc(2)Hex(7)

z=3

Error (ppm) = 0.71

Retention Time (min) = 20.33

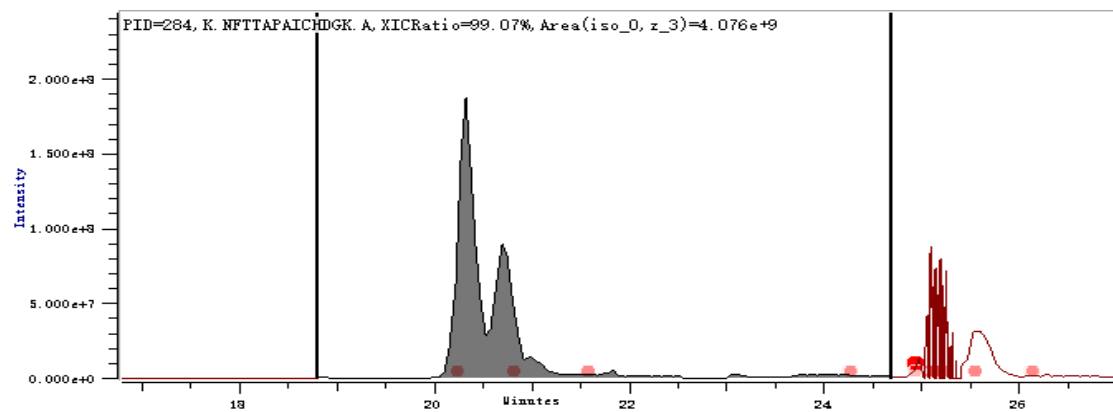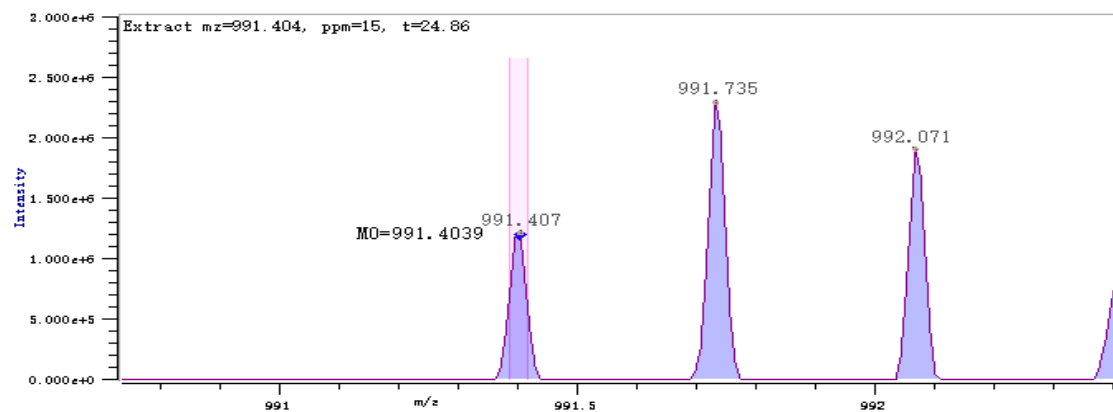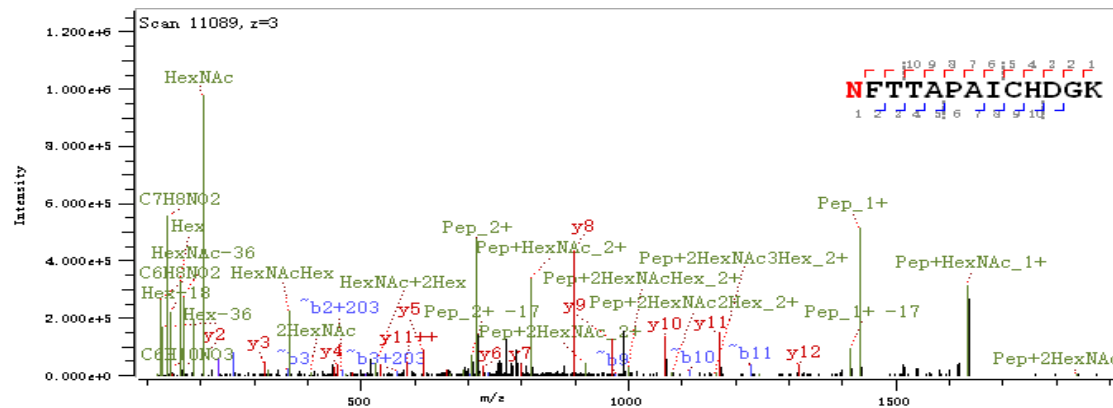

N1098

Sample = SARS-COV-2 Virus S\_trypsin\_full\_309N 2021-4-11

Sequence = EGVFVSN<sup>15</sup>NGTHWFVTQR; Mods = NGlycan/2190.7932/HexNAc(6)Hex(6)

z=3

Error (ppm) = 2.49

Retention Time (min) = 82.28

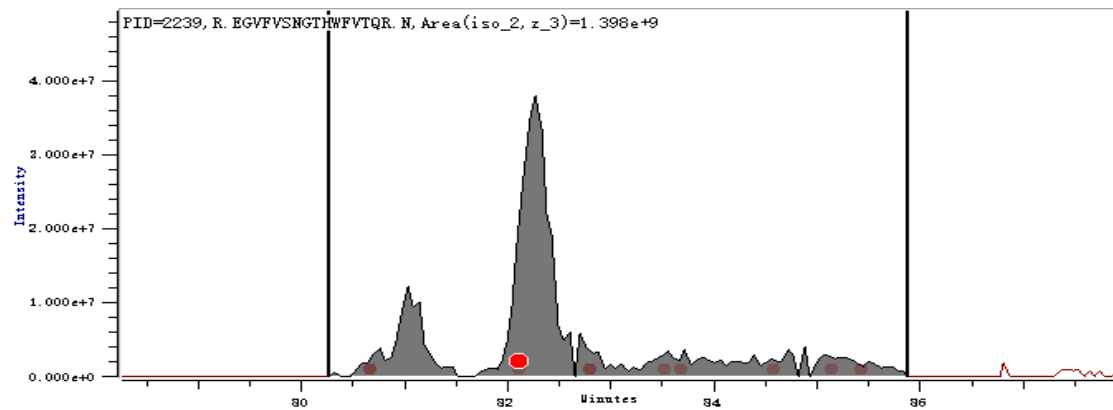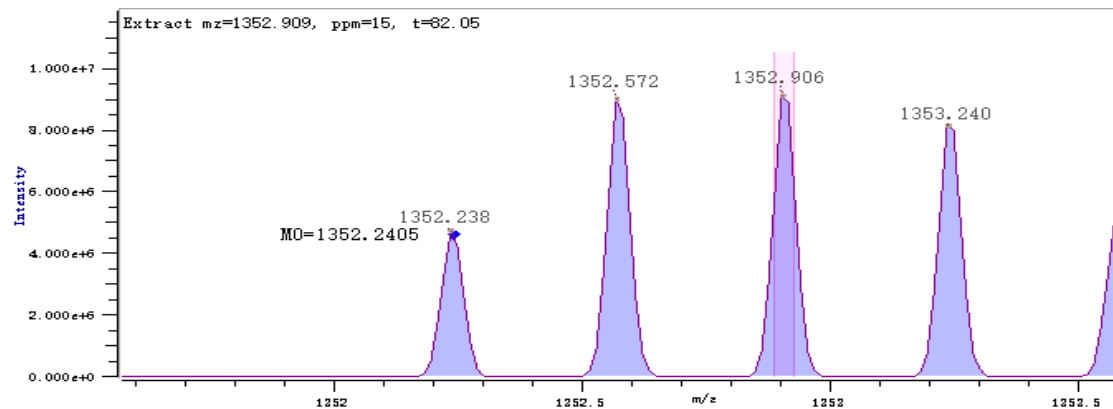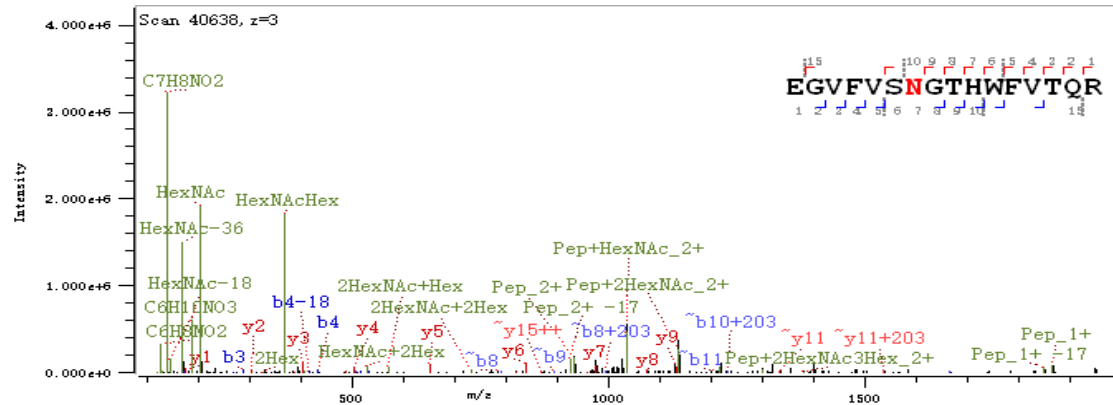

**N1134**

Sample = SARS-COV-2 Virus S \_ Lytic\_ full\_309N 2021-4-11

Sequence = IGIVNNT; Mods = NGLycan/2424.8671/HexNAc(5)Hex(6)Fuc(1)NeuAc(1)

z=3

Error (ppm) = -0.37

Retention Time (min) = 69.27

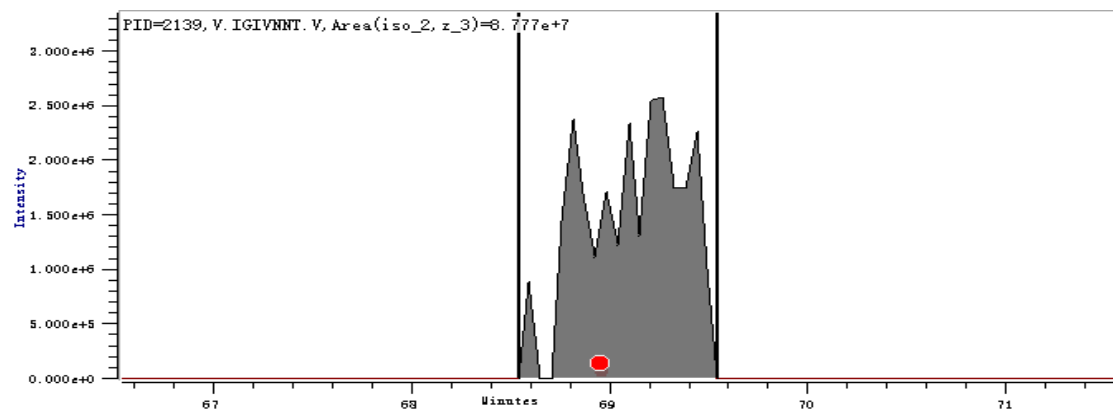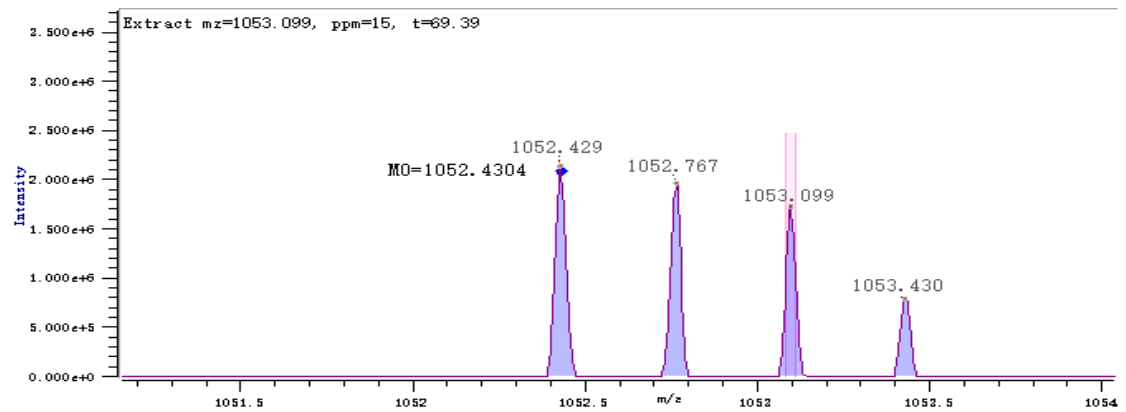

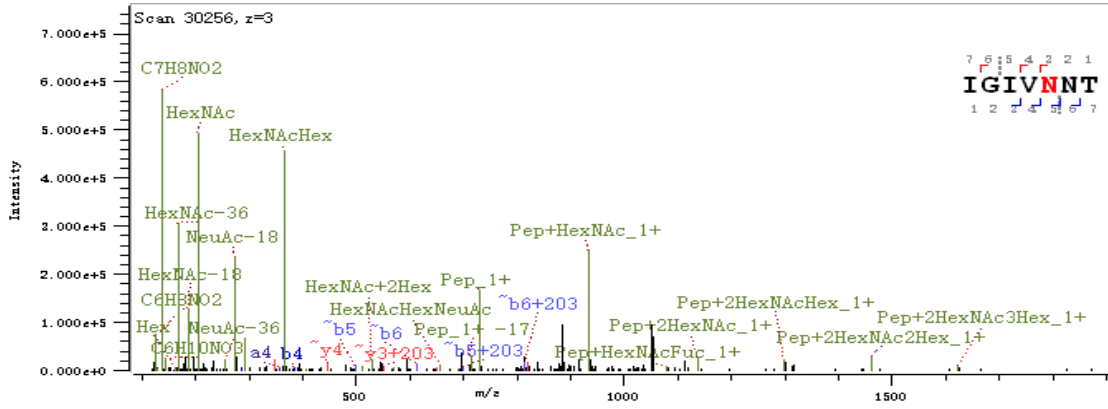

**N1158**

Sample = SARS-COV-2 Virus S\_deglycan\_O18\_chymotrypsin\_semi\_780 2021-4-11

Sequence = FKNHTSPDVLGD; Mods = Deamidated/2.9883/

z=2

Error (ppm) = -0.80

Retention Time (min) = 39.86

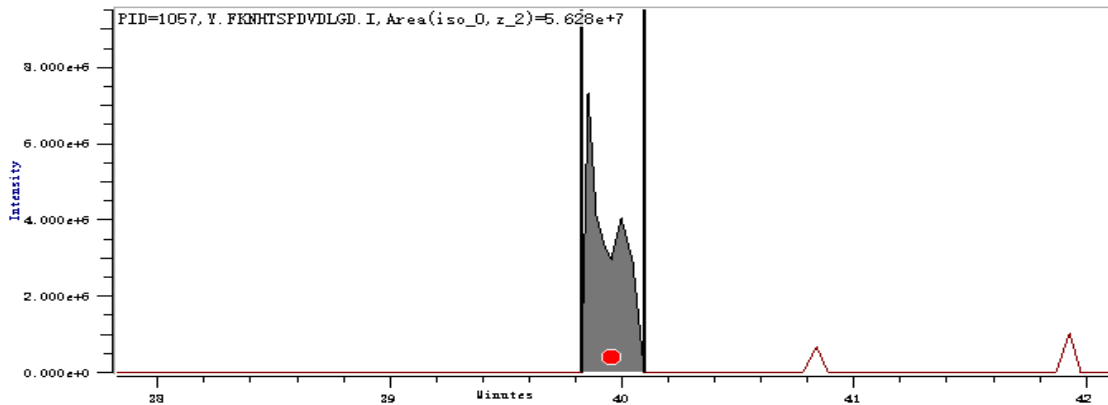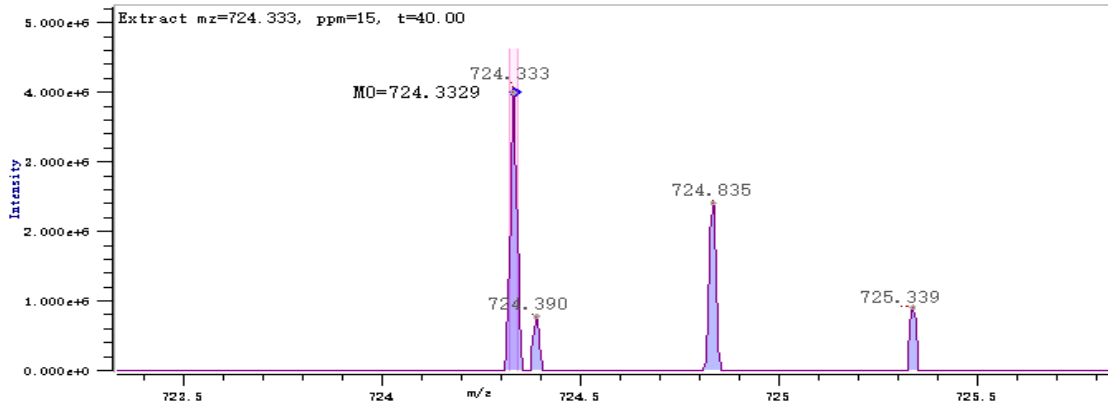

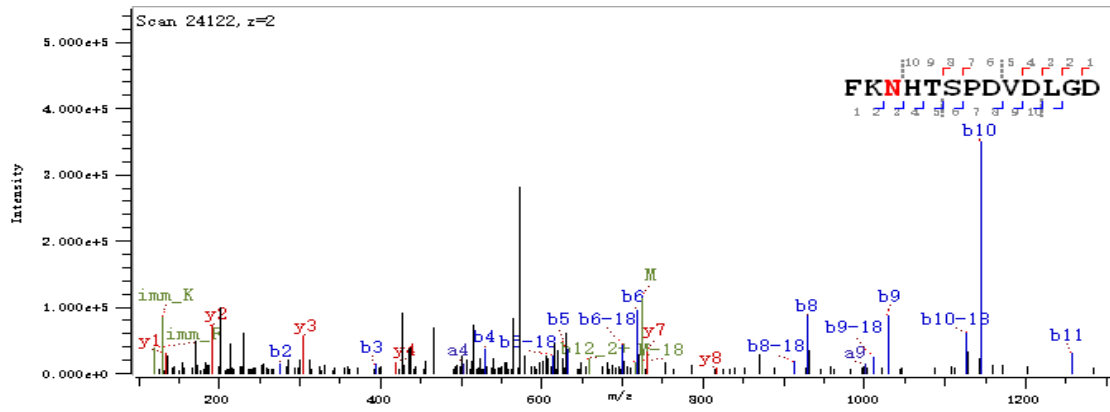

### N1173

Sample = SARS-COV-2 Virus S\_deglycan\_O18\_Lytic\_semi\_780 2021-4-11

Sequence = DISGINAS; Mods = Deamidated/2.9883/

z=1

Error (ppm) = -0.91

Retention Time (min) = 63.40

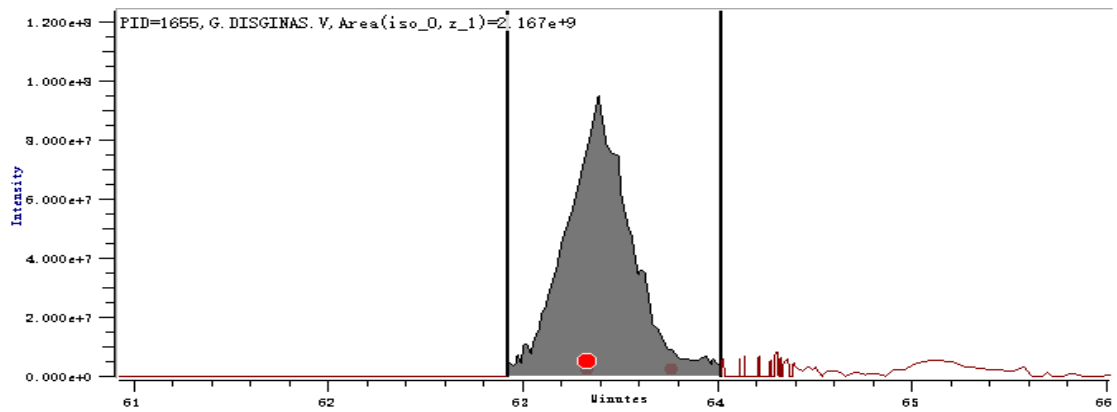

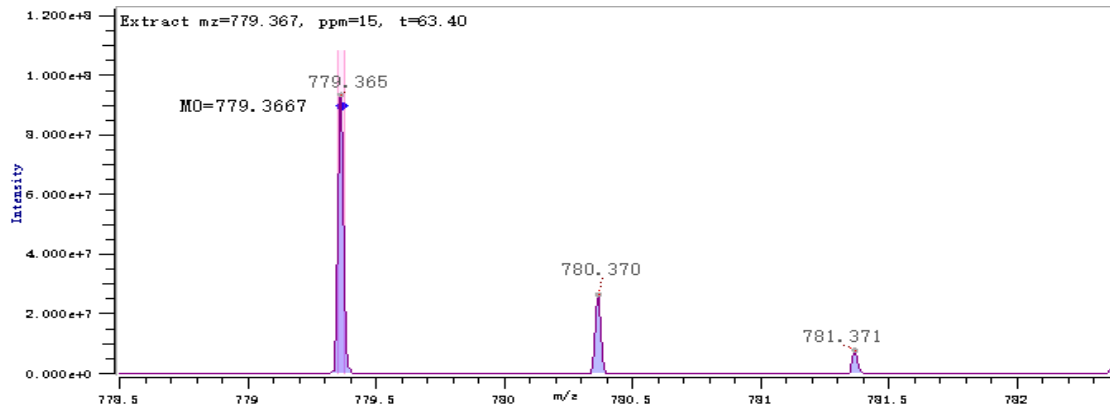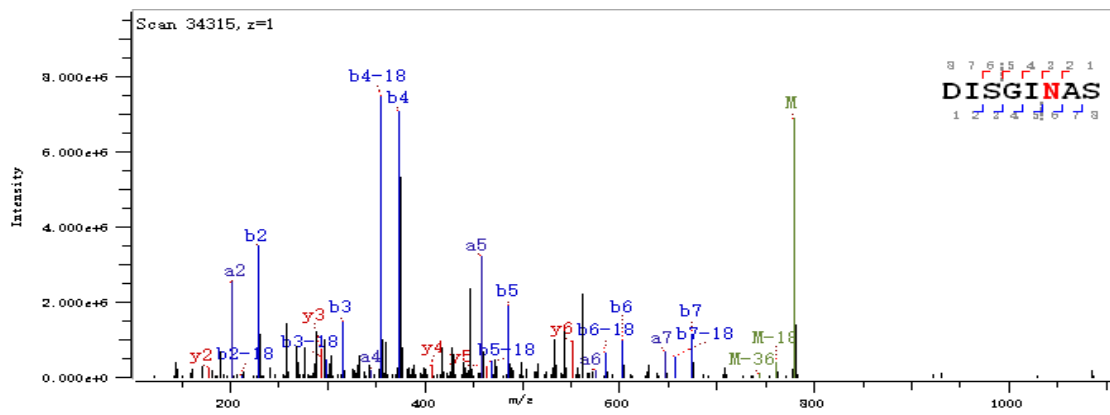

**N1194**

Sample = SARS-COV-2 Virus S\_trypsin\_full\_309N 2021-4-11

Sequence = NLNESLIDLQELGK; Mods = NGlycan/1768.6395/HexNAc(4)Hex(5)Fuc(1)

z=3

Error (ppm) = 1.10

Retention Time (min) = 113.16



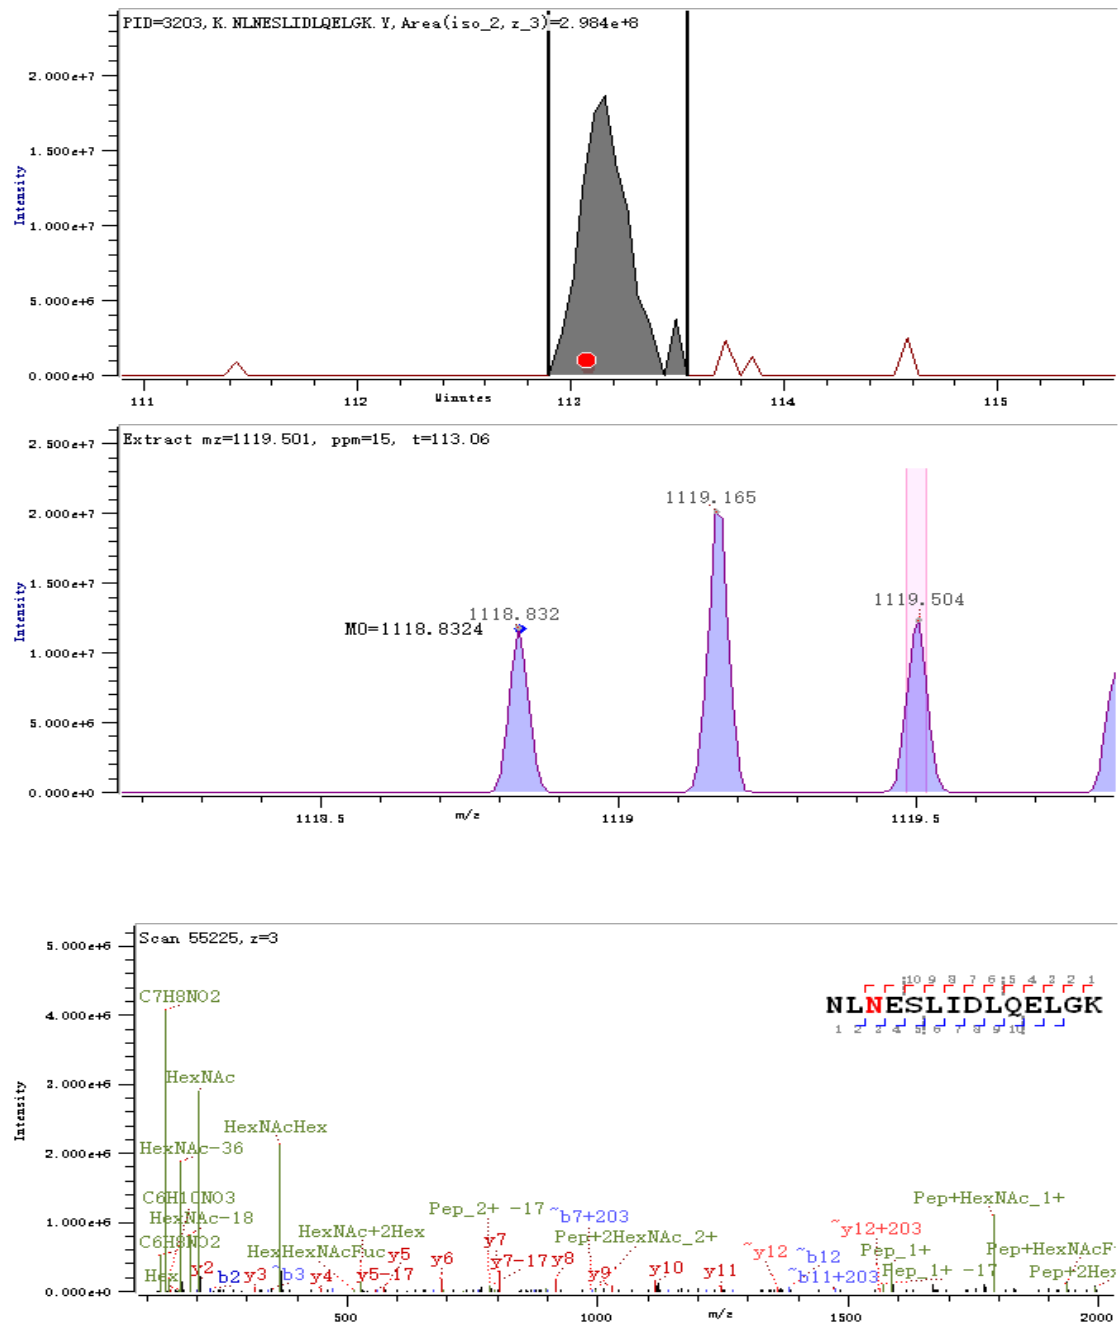

**Fig. S2. The identification of 22 *N*-glycosites of the S protein extracted from the SARS-CoV-2 virions**

For each peptide/glycopeptide detected the corresponding extracted ion chromatogram (XIC) (upper panel), precursor isotope distribution (middle panel), MS/MS spectrum (lower panel) are shown.

The monoisotopic peak is marked as “MO=” with a blue dot (middle panel). The fragment b- and

y-ions are in blue and red color, respectively; the c- and z-ions are marked in cyan and orange, respectively. The oxonium ions are in green color.

## T22

Sample = 4th virus chymotrypsin HCD20 N+O using 6 most O 2021-6-29

Sequence = RTQLPPAYTNSFTRGVY; Mods = OGlycan/203.0794/HexNAc(1)

z=3

Error (ppm) = 1.51

Retention Time (min) = 61.99

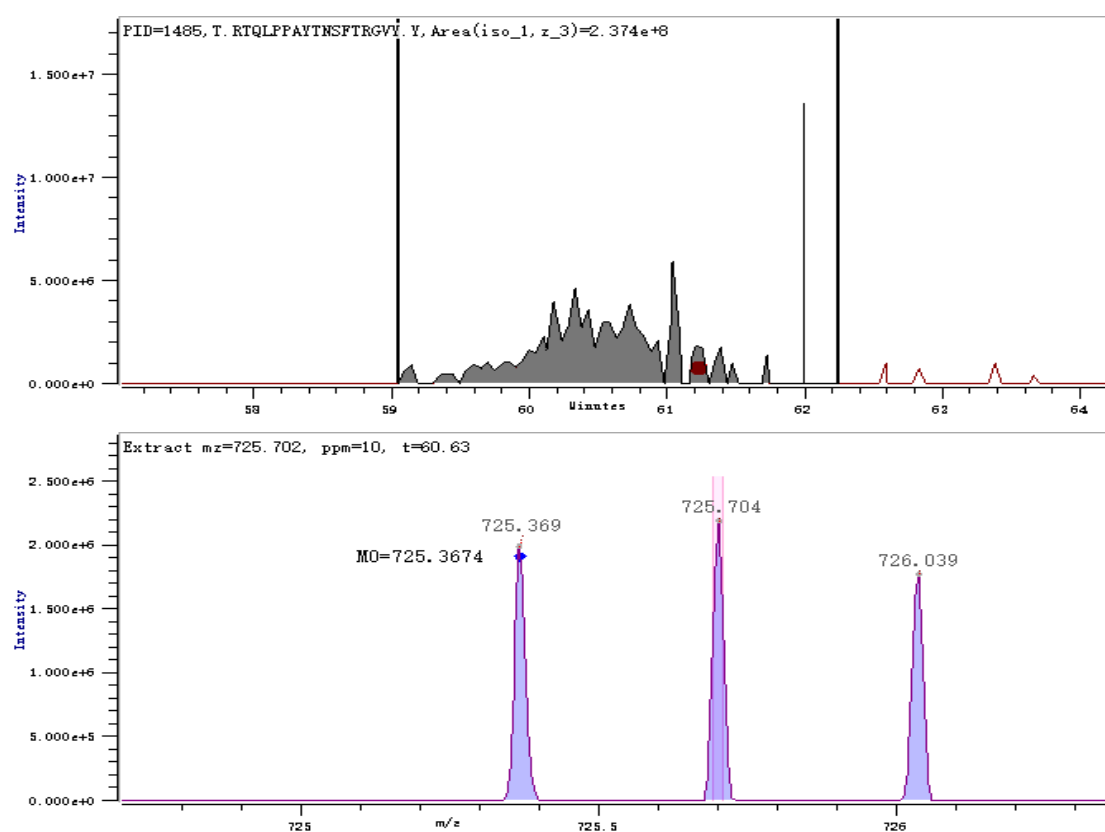

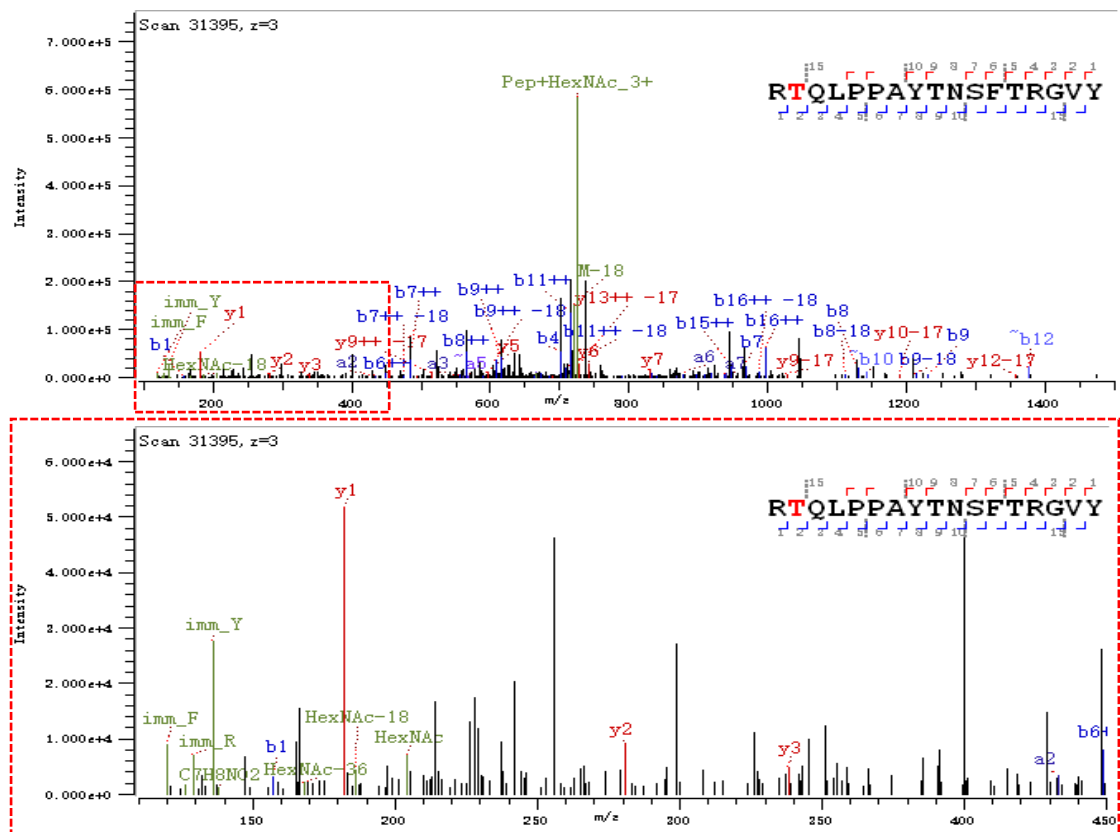

| Diagnostic ions | observed m/z | B ions    | observed m/z | Y ions        | observed m/z |
|-----------------|--------------|-----------|--------------|---------------|--------------|
| b1              | 157.097      | C6H8NO2   | 126.056      | M-36          | 713.363      |
| a2              | 433.215      | C7H8NO2   | 138.053      | M-18          | 719.368      |
|                 |              | HexNac-36 | 168.066      | Pep+HexNac_3+ | 725.386      |
|                 |              | HexNac-18 | 186.077      |               |              |
|                 |              | HexNac    | 204.087      |               |              |

**S60**

Sample = 4th virus chymotrypsin HCD30 N+O using 6 most O 2021-6-29

Sequence = FSNVT;

Mods = NGLycan/1378.4757; OGLycan/365.1322/HexNac(2)Hex(6),HexNac(1)Hex(1)

z=2

Error (ppm) = 5.69

Retention Time (min) = 85.20

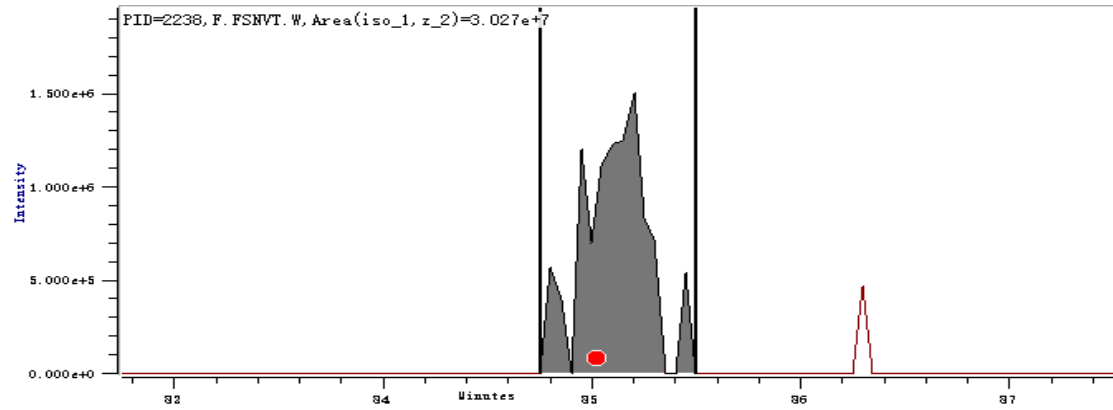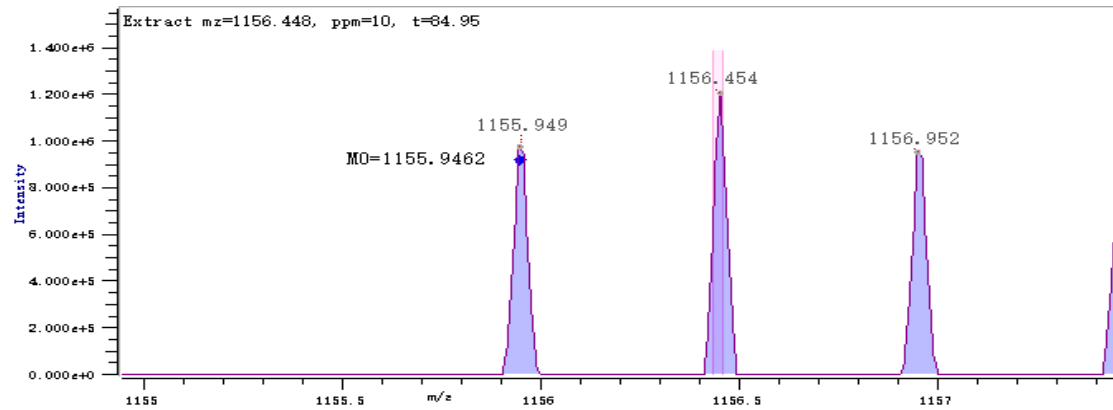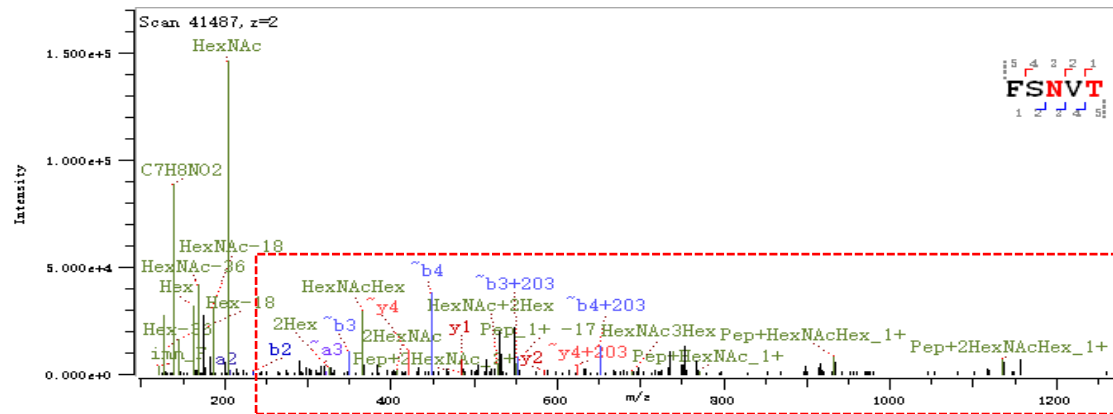

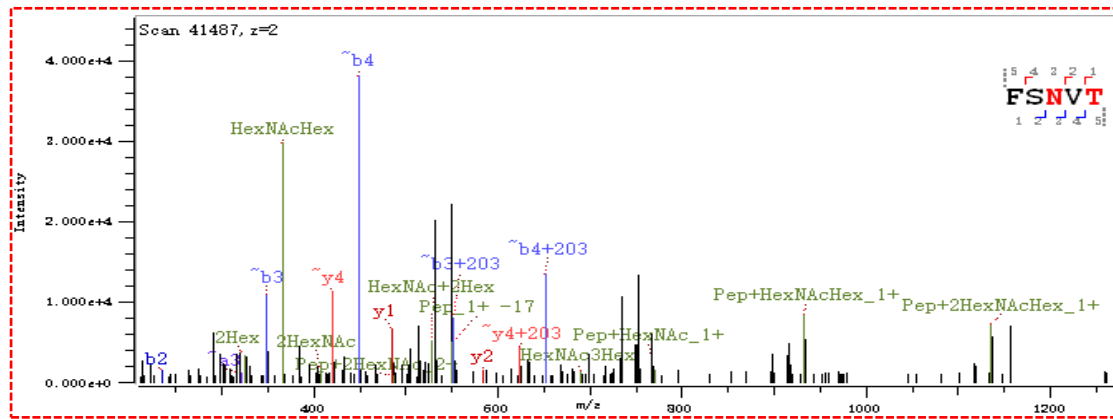

| Diagnostic ions | observed m/z | B ions    | observed m/z | Y ions            | observed m/z |
|-----------------|--------------|-----------|--------------|-------------------|--------------|
| ~b3             | 349.152      | C6H8NO2   | 126.055      | Pep_1+ -17        | 550.270      |
| ~b3+203         | 552.23       | C7H8NO2   | 138.055      | Pep+HexNAc_1+     | 700.367      |
| ~b4             | 448.220      | C6H10NO3  | 144.066      | Pep+2HexNAc_2+    | 487.220      |
| ~b4+203         | 651.300      | Hex-36    | 127.039      | Pep+HexNAcHex_1+  | 932.415      |
| y1              | 485.204      | HexNAc-36 | 168.066      | Pep+2HexNAcHex_1+ | 1135.494     |
| y2              | 584.271      | HexNAc-18 | 186.076      |                   |              |
|                 |              | HexNAc    | 204.087      |                   |              |
|                 |              | HexNAcHex | 366.139      |                   |              |

**T124**

Sample = 4th virus chymotrypsin HCD15 N+O using 6 most O 2021-6-29

Sequence = IVNNATNVVIVKVEF;

Mods = NGlycan/1736.6497; OGlycan/203.0794/HexNAc(4)Hex(3)Fuc(3),HexNAc(1)

z=3

Error (ppm) = 8.96

Retention Time (min) = 96.70

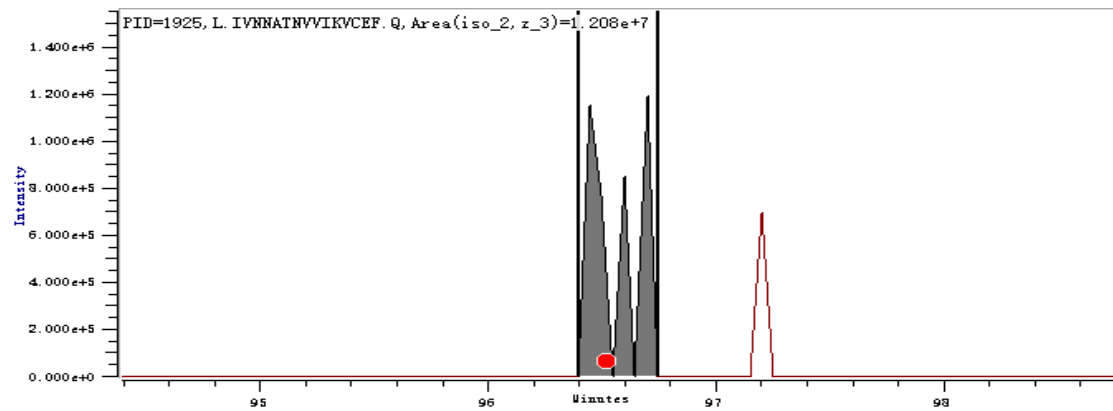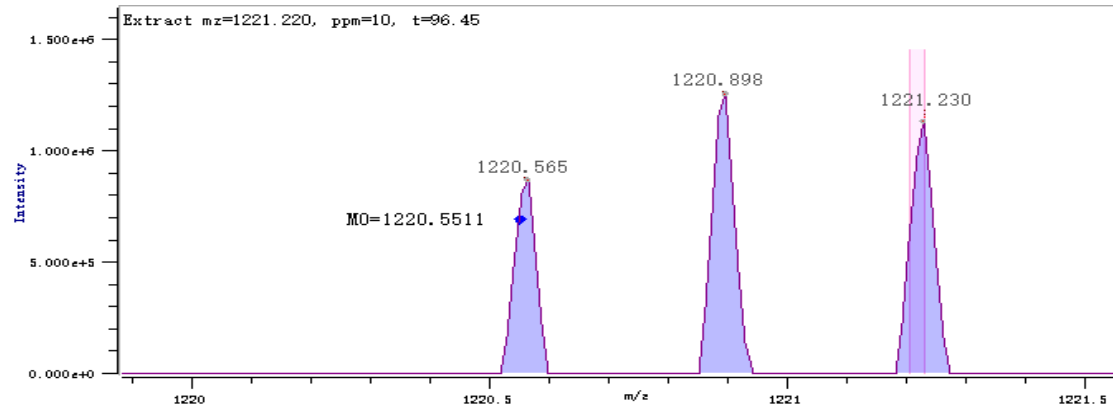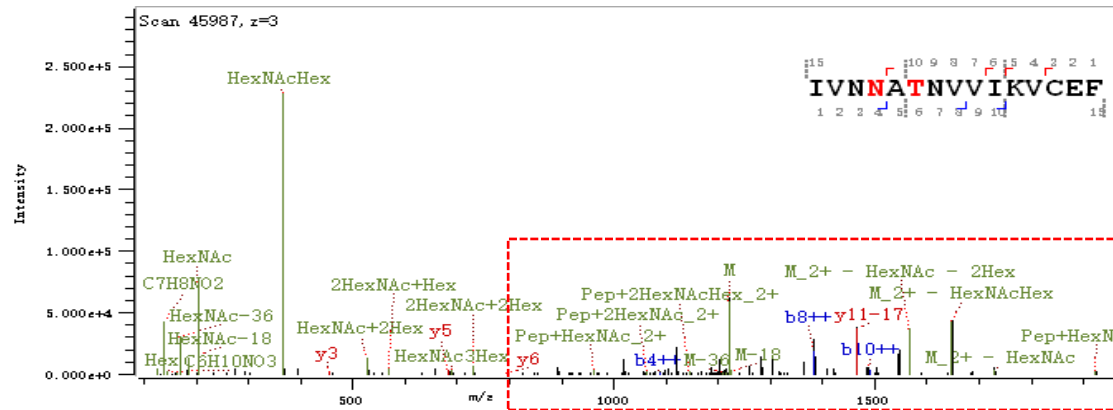

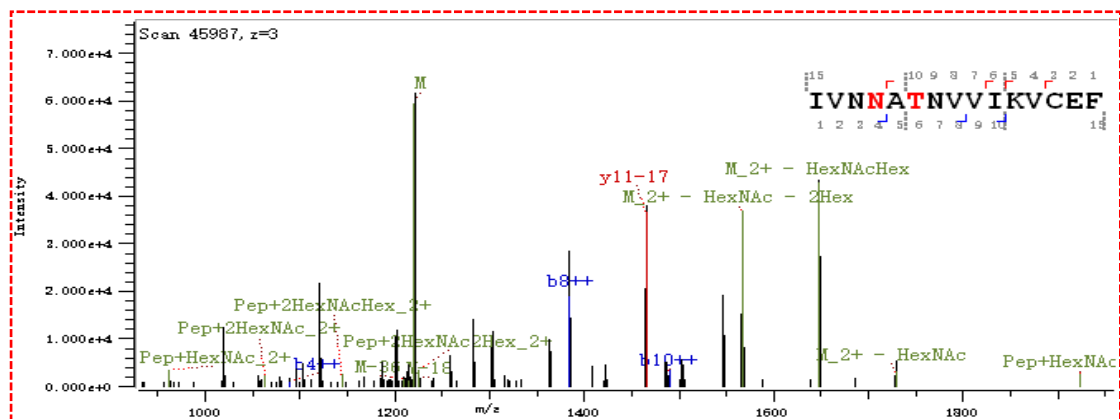

| Diagnostic ions | observed m/z | B ions      | observed m/z | Y ions                                    | observed m/z |
|-----------------|--------------|-------------|--------------|-------------------------------------------|--------------|
| b4++            | 1089.523     | C6H8NO2     | 126.055      | M-36                                      | 1208.587     |
| y11-17          | 1465.701     | C7H8NO2     | 138.055      | M-18                                      | 1214.562     |
|                 |              | C6H10NO3    | 144.066      | M                                         | 1220.594     |
|                 |              | Hex         | 163.060      | M <sub>2</sub> <sup>+</sup> - HexNac2Hex  | 1566.740     |
|                 |              | HexNac-36   | 168.066      | M <sub>2</sub> <sup>+</sup> - HexNacHex   | 1647.766     |
|                 |              | HexNac-18   | 186.076      | M <sub>2</sub> <sup>+</sup> - HexNac      | 1728.789     |
|                 |              | HexNac      | 204.087      | Pep+HexNac <sub>1</sub> <sup>+</sup>      | 1922.987     |
|                 |              | HexNacHex   | 366.140      | Pep+HexNac <sub>2</sub> <sup>+</sup>      | 961.996      |
|                 |              | HexNac2Hex  | 528.194      | Pep+2HexNac <sub>2</sub> <sup>+</sup>     | 1063.538     |
|                 |              | HexNac3Hex  | 690.246      | Pep+2HexNacHex <sub>2</sub> <sup>+</sup>  | 1144.560     |
|                 |              | 2HexNacHex  | 569.220      | Pep+2HexNac2Hex <sub>2</sub> <sup>+</sup> | 1225.583     |
|                 |              | 2HexNac2Hex | 731.272      |                                           |              |

Sample = 2nd virus chymotrypsin N+O search

Sequence = YHKNNKSW;

Mods = NGlycan/2272.8463; OGlycan/365.1322/HexNAc(8)Hex(4), HexNAc(1)Hex(1)

z=4

Error (ppm) = -7.56

Retention Time (min) = 13.98

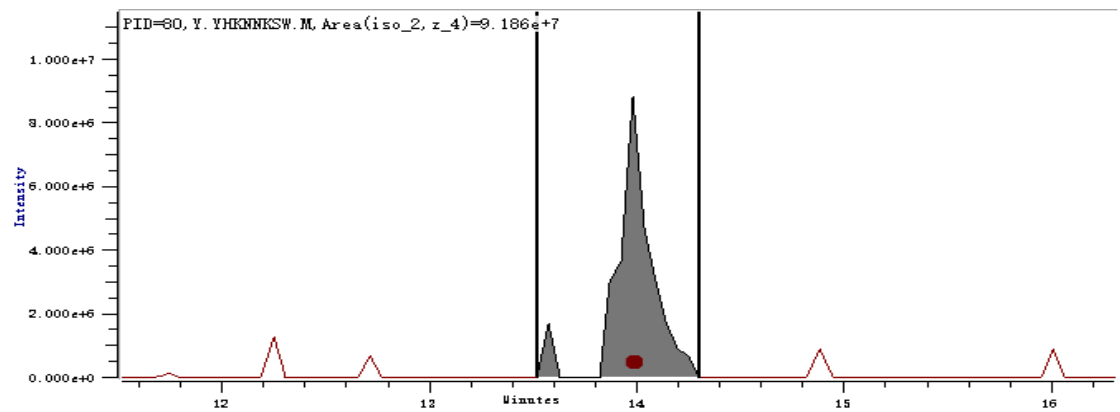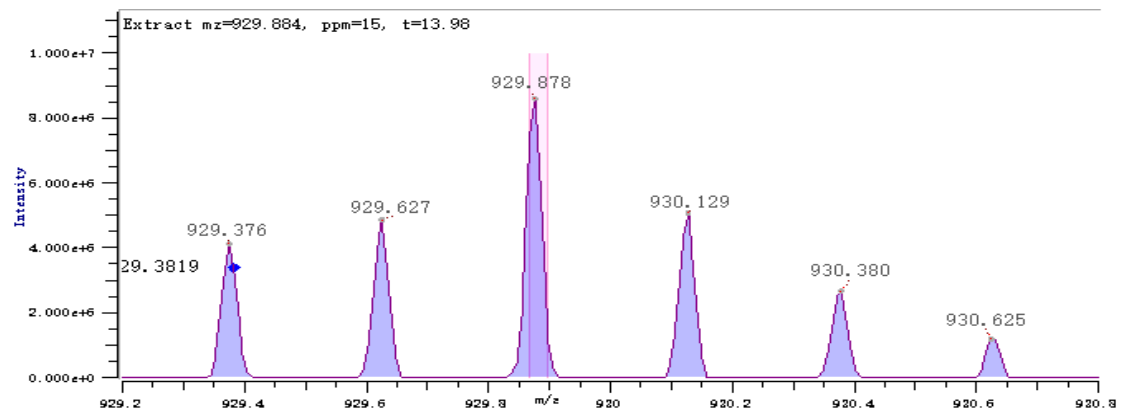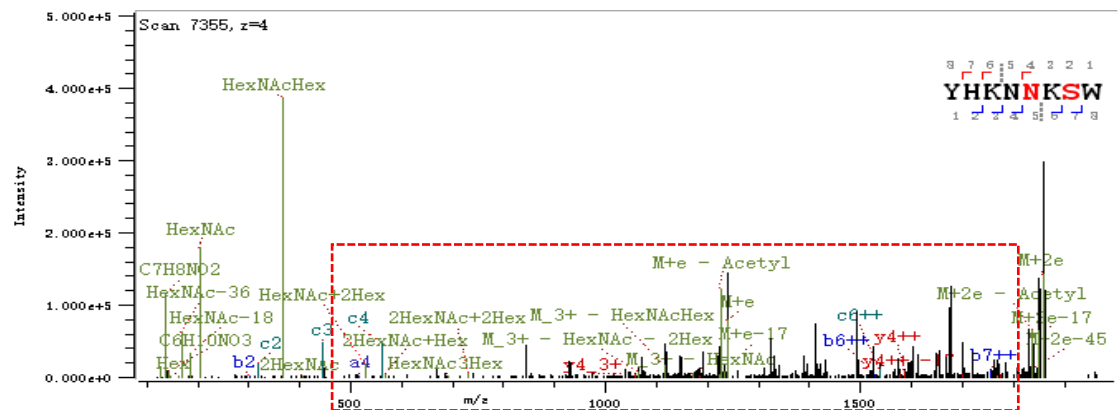



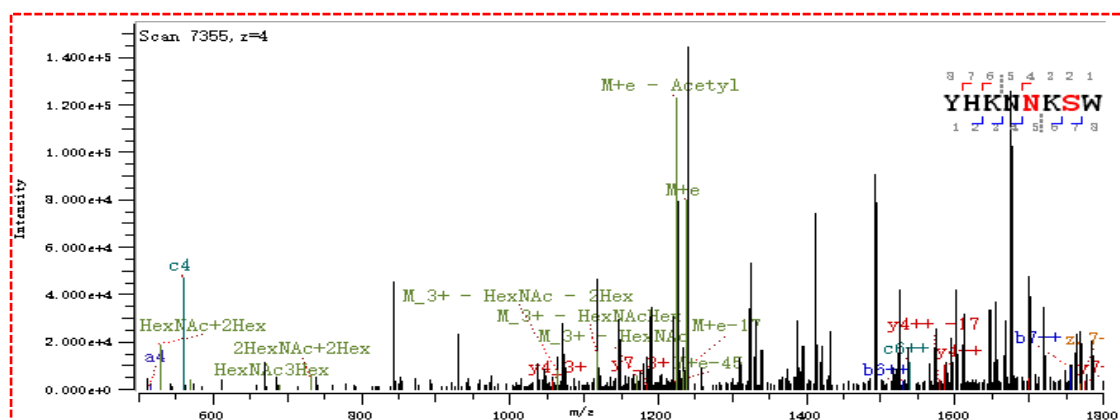

| Diagnostic ions | observed m/z | B ions     | observed m/z | Y ions                        | observed m/z |
|-----------------|--------------|------------|--------------|-------------------------------|--------------|
| b6++            | 1529.627     | C6H8NO2    | 126.055      | M                             | 924.414      |
| b7++            | 1755.707     | C7H8NO2    | 138.055      | M <sub>3+</sub> - HexNac2Hex  | 1063.102     |
| c6++            | 1538.134     | C6H10NO3   | 144.066      | M <sub>3+</sub> - HexNacHex   | 1117.121     |
| c7++            | 1764.216     | Hex-36     | 127.039      | M <sub>3+</sub> - HexNac      | 1171.146     |
|                 |              | Hex-18     | 145.050      | Pep+HexNac <sub>3+</sub>      | 427.184      |
|                 |              | Hex        | 163.060      | Pep+2HexNacHex <sub>1+</sub>  | 1644.668     |
|                 |              | HexNac-36  | 168.066      | Pep+2HexNac2Hex <sub>1+</sub> | 1806.739     |
|                 |              | HexNac-18  | 186.076      |                               |              |
|                 |              | HexNac     | 204.087      |                               |              |
|                 |              | 2HexNac    | 407.168      |                               |              |
|                 |              | HexNacHex  | 366.140      |                               |              |
|                 |              | HexNac2Hex | 528.193      |                               |              |
|                 |              | HexNac3Hex | 690.249      |                               |              |

|  |  |             |         |  |  |
|--|--|-------------|---------|--|--|
|  |  | 2HexNAcHex  | 569.220 |  |  |
|  |  | 2HexNAc2Hex | 731.273 |  |  |

**T236**

Sample = 2nd virus chymotrypsin N+O using 6 most O search

Sequence = EPLVDLPIGINITRF;

Mods = NGLycan/1054.3700; OGLycan/947.3230/HexNAc(2)Hex(4),HexNAc(1)Hex(1)NeuAc(2)

z=2

Error (ppm) = 9.95

Retention Time (min) = 142.08

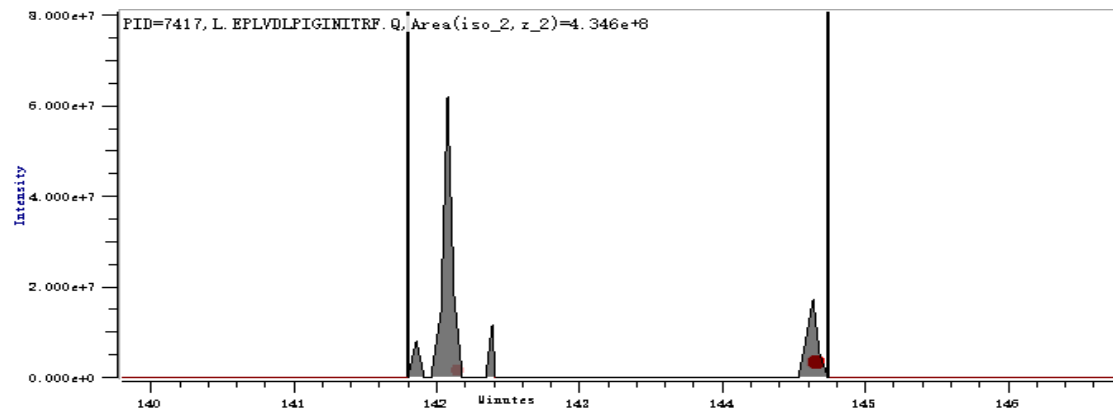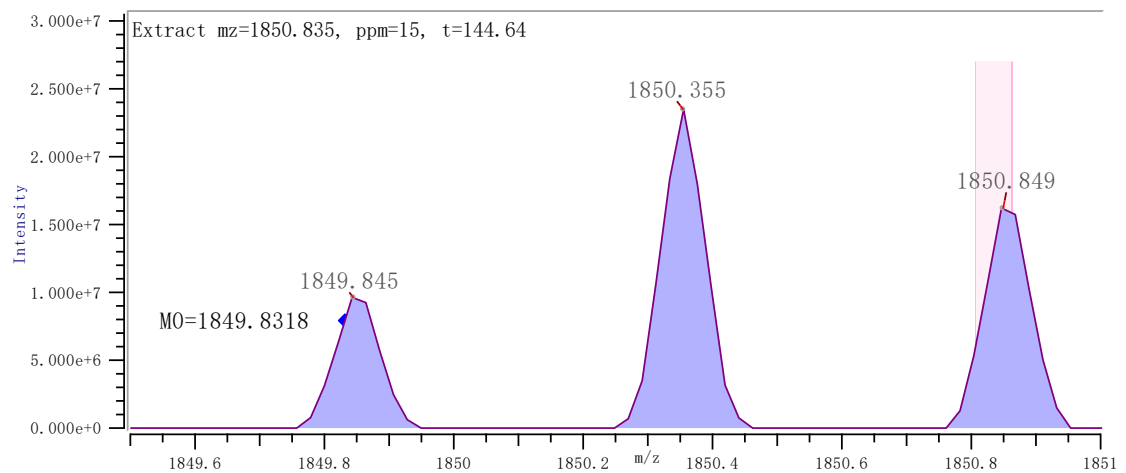

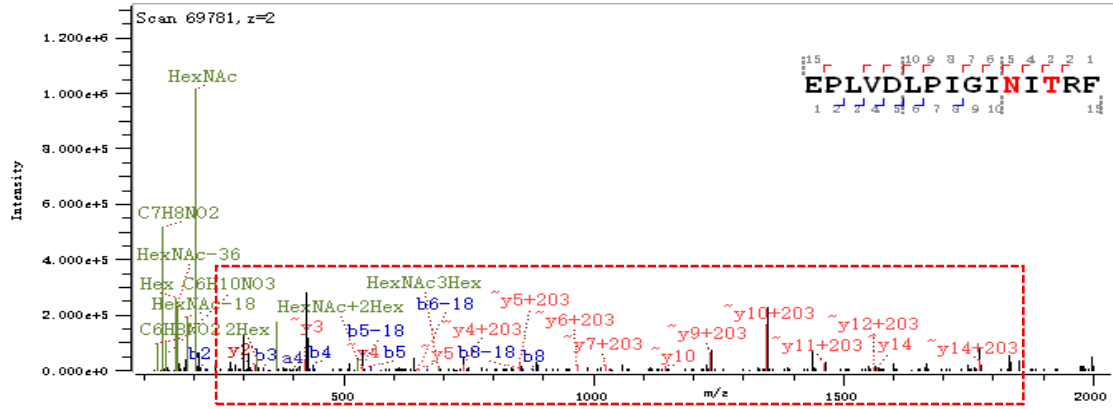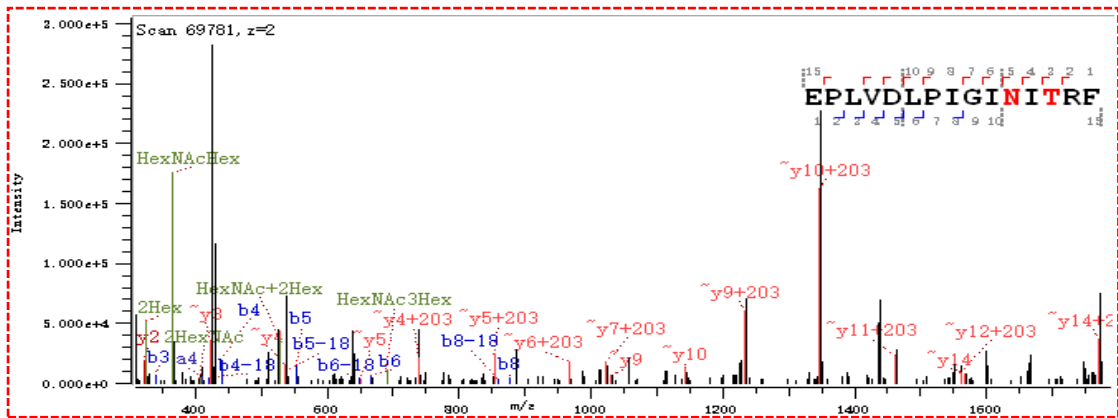

| Diagnostic ions | observed m/z | B ions    | observed m/z | Y ions | observed m/z |
|-----------------|--------------|-----------|--------------|--------|--------------|
| ~ y4+203        | 739.406      | C6H8NO2   | 126.055      |        |              |
|                 |              | C7H8NO2   | 138.055      |        |              |
|                 |              | C6H10NO3  | 144.065      |        |              |
|                 |              | Hex-36    | 127.039      |        |              |
|                 |              | Hex-18    | 145.049      |        |              |
|                 |              | Hex       | 163.060      |        |              |
|                 |              | 2Hex      | 325.113      |        |              |
|                 |              | HexNAc-18 | 186.076      |        |              |

|  |  |            |         |  |  |
|--|--|------------|---------|--|--|
|  |  | HexNAc-36  | 168.066 |  |  |
|  |  | HexNAc     | 204.087 |  |  |
|  |  | 2HexNAc    | 407.166 |  |  |
|  |  | HexNAcHex  | 366.140 |  |  |
|  |  | HexNAc2Hex | 528.193 |  |  |
|  |  | HexNAc3Hex | 690.246 |  |  |

**S305 & T307**

Sample = SARS-COV-2 Virus S\_deglycan\_O18\_Lytic\_semi\_780 2021-4-11

Sequence = KCTLKSFT;

Mods = OGLycan/1238.4184; OGLycan/365.1322/HexNAc(1)Hex(1),HexNAc(1)Hex(1)NeuAc(3)

z=3

Error (ppm) = 1.15

Retention Time (min) = 20.43

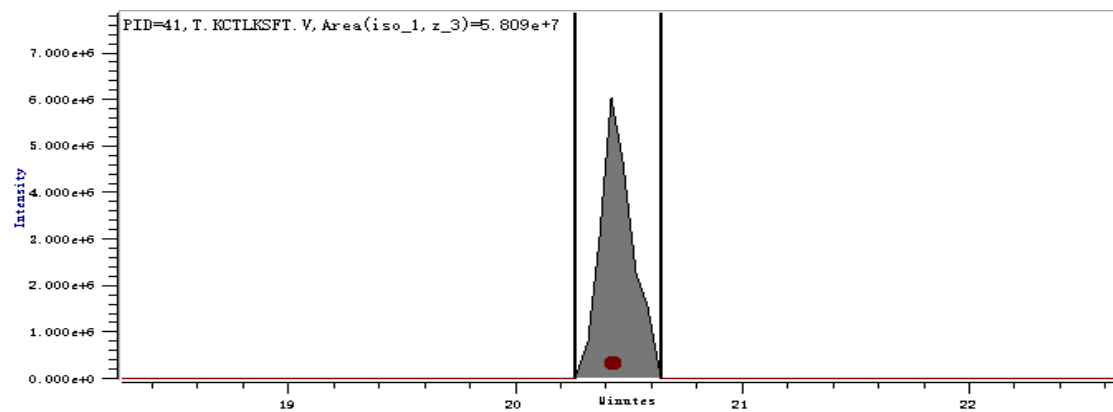

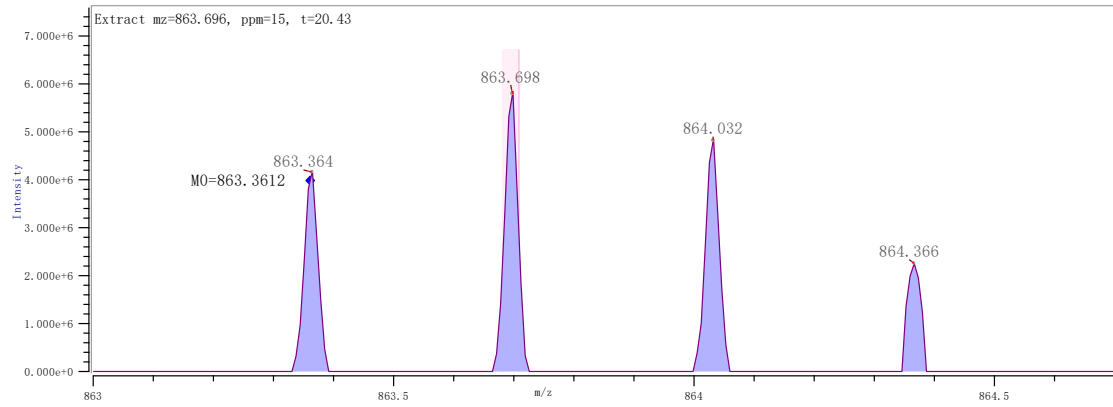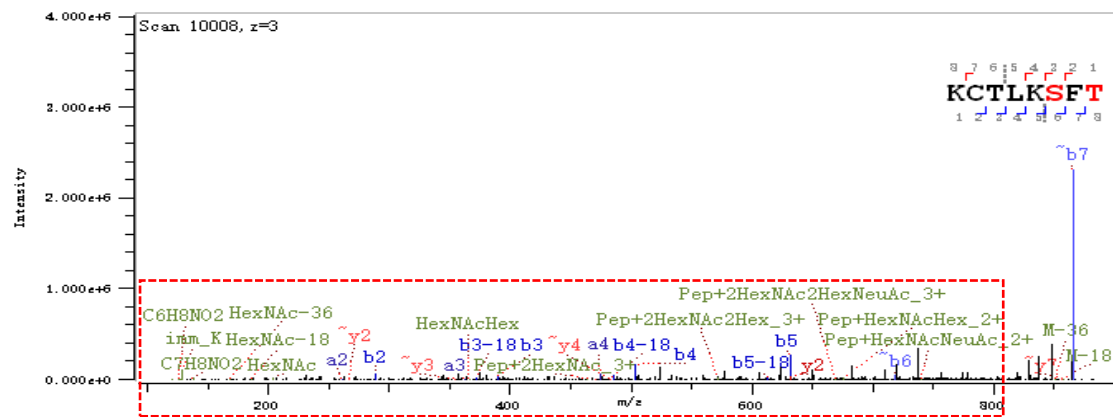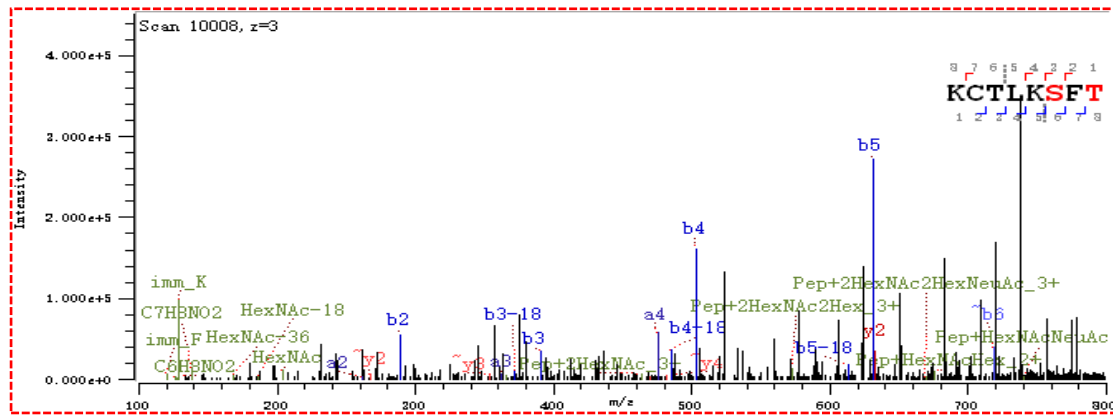

| Diagnostic ions | observed m/z | B ions  | observed m/z | Y ions | observed m/z |
|-----------------|--------------|---------|--------------|--------|--------------|
|                 | ~y2+203      | C6H8NO2 | 126.055      | M-36   | 851.403      |
|                 |              | C7H8NO2 | 138.055      | M-18   | 857.380      |

|  |  |           |         |                         |         |
|--|--|-----------|---------|-------------------------|---------|
|  |  | HexNAc-36 | 168.066 | Pep+2HexNAc_3+          | 464.251 |
|  |  | HexNAc-18 | 186.076 | Pep+HexNAcHex_2+        | 675.328 |
|  |  | HexNAc    | 204.087 | Pep+2HexNAc2Hex_3+      | 572.287 |
|  |  | HexNAcHex | 366.141 | Pep+HexNAcNeuAc_2+      | 739.923 |
|  |  |           |         | Pep+2HexNAc2HexNeuAc_3+ | 669.340 |

### T323

Sample = 4th virus trypsin HCD20 N+O using 6 most O 2021-6-29

Sequence = VQPTESIVR; Mods = Oglycan/203.0794/HexNAc(1)

z=2

Error (ppm) = 2.70

Retention Time (min) = 12.50

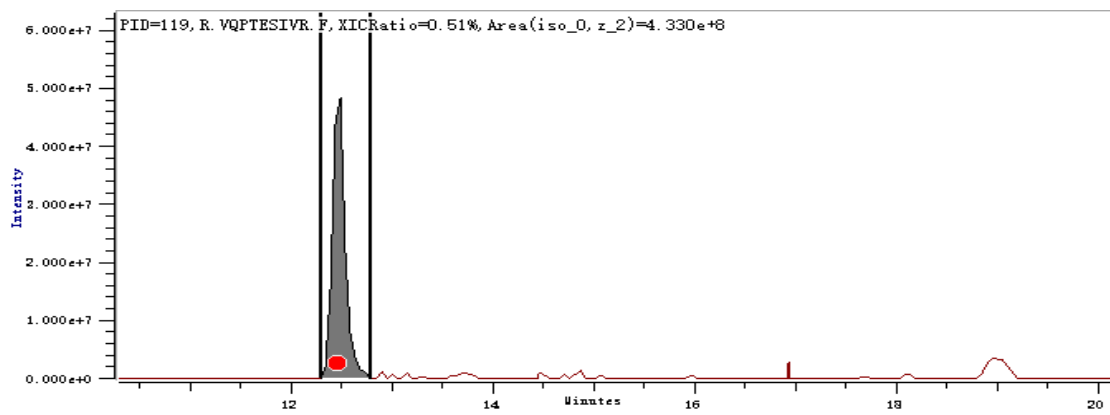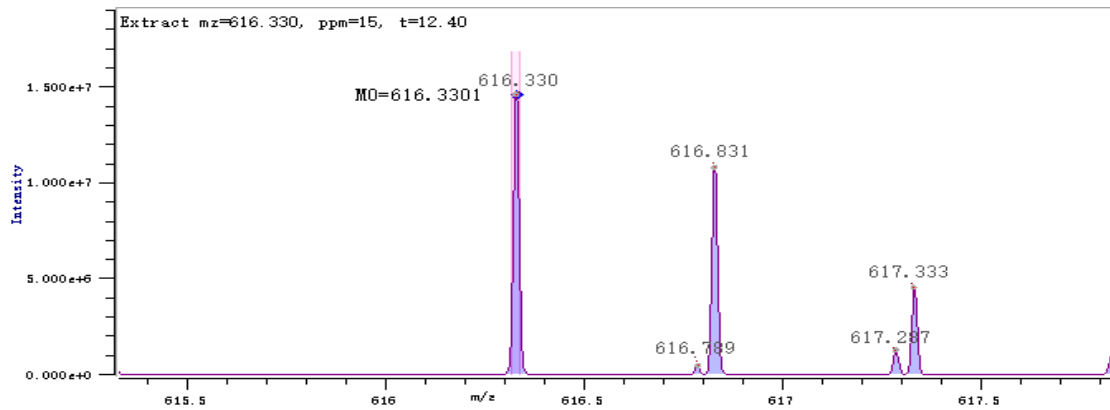

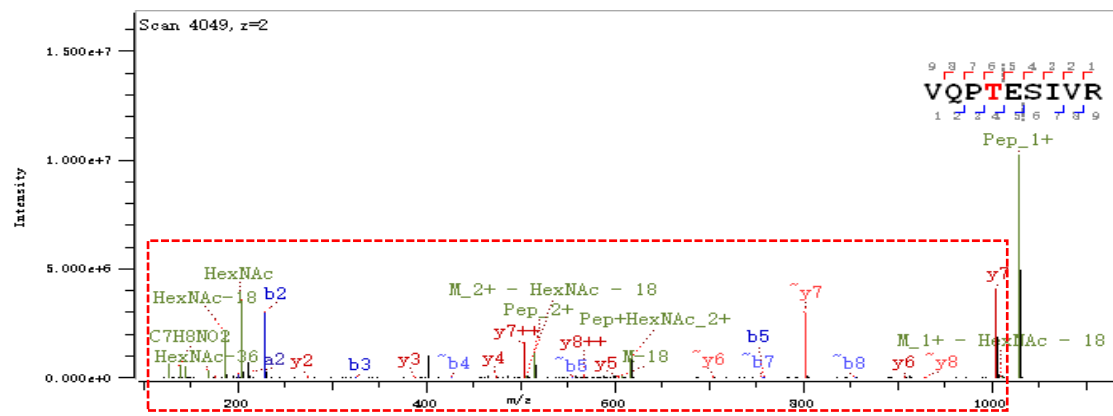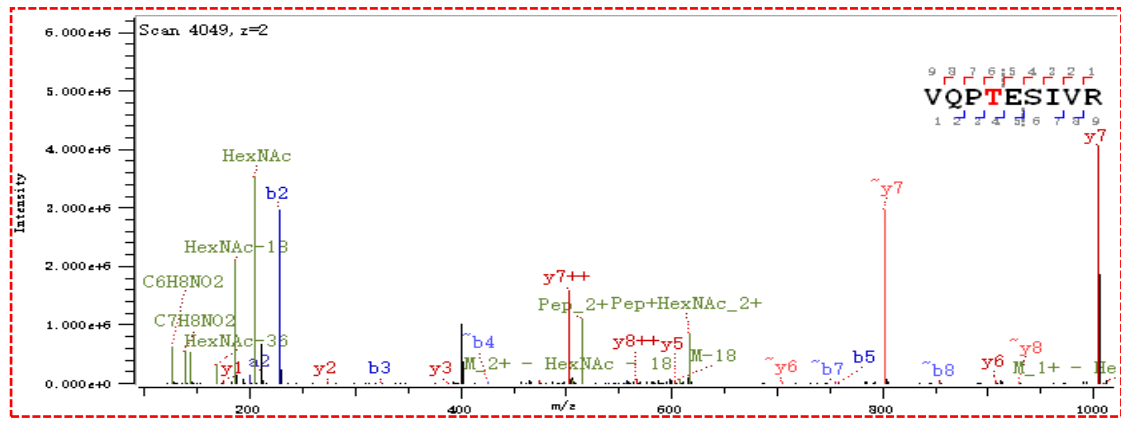

| Diagnostic ions | observed m/z | B ions    | observed m/z | Y ions           | observed m/z |
|-----------------|--------------|-----------|--------------|------------------|--------------|
| b3              | 325.188      | C6H8NO2   | 126.055      | M-18             | 607.331      |
| b5              | 758.354      | C7H8NO2   | 138.055      | M_1+ - HexNAc-18 | 505.788      |
| y5              | 603.349      | C6H10NO3  | 144.065      | M_2+ - HexNAc-18 | 1010.564     |
| y7              | 1004.530     | HexNAc-36 | 168.066      | Pep_1+           | 1028.578     |
| y7++            | 502.769      | HexNAc-18 | 186.076      | Pep_2+           | 514.793      |
|                 |              | HexNAc    | 204.087      | Pep+HexNAc_2+    | 616.332      |

Sample = 4th virus chymotrypsin HCD15 N+O using 6 most O 2021-6-29

Sequence = GGVSVITPGTNTSNQVAVLY;

Mods = NGlycan/1378.4757; OGlycan/365.1322/HexNAc(2)Hex(6),HexNAc(1)Hex(1)

z=3

Error (ppm) = 6.99

Retention Time (min) = 100.76

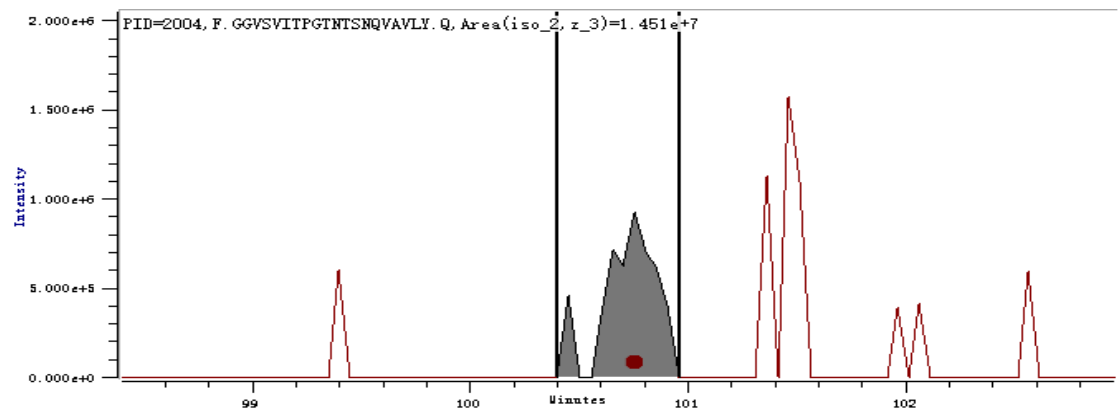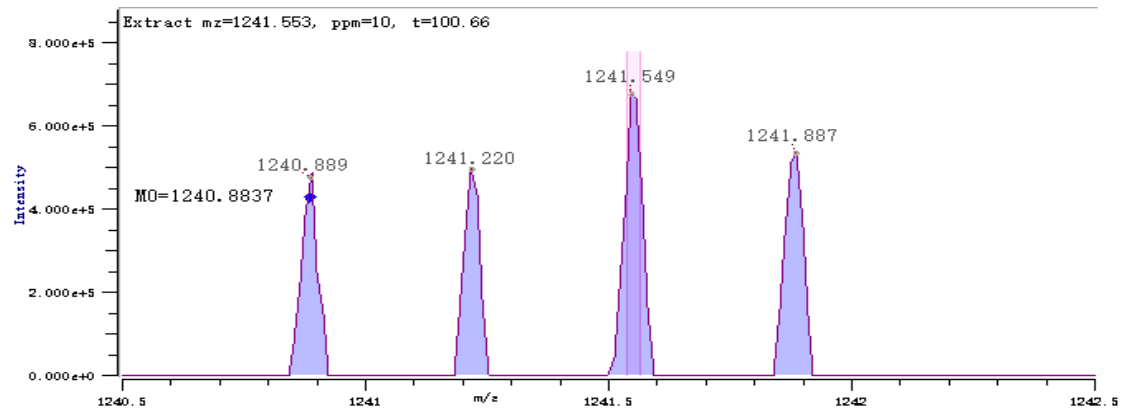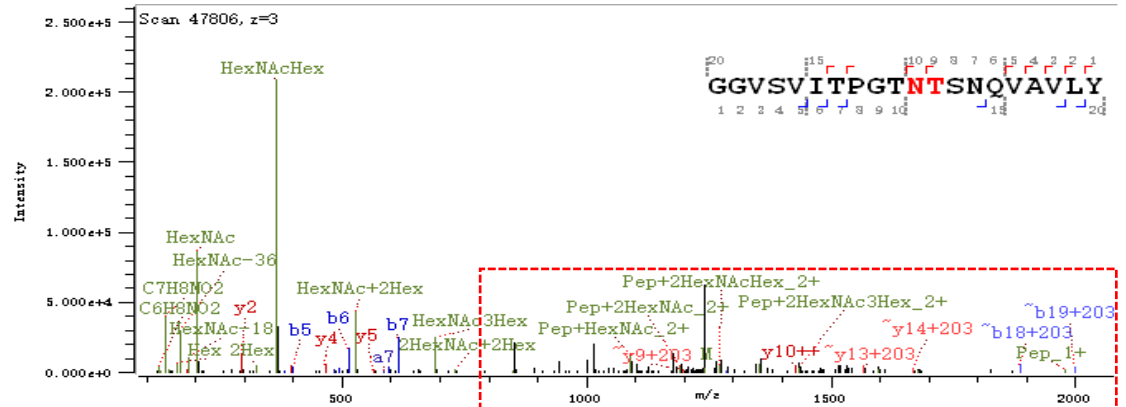



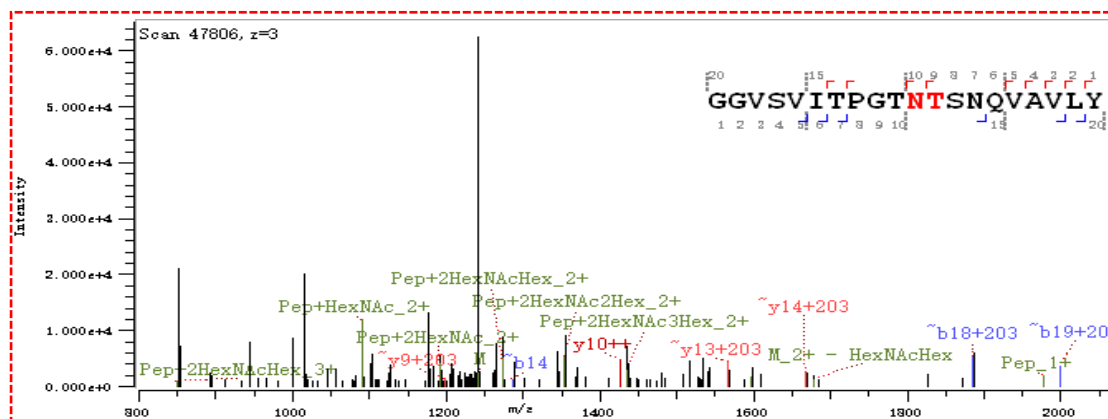

| Diagnostic ions   | observed m/z | B ions                                         | observed m/z | Y ions                                    | observed m/z |
|-------------------|--------------|------------------------------------------------|--------------|-------------------------------------------|--------------|
| ~y9+203           | 1197.545     | C <sub>6</sub> H <sub>8</sub> NO <sub>2</sub>  | 126.055      | M                                         | 1240.946     |
| y10 <sup>++</sup> | 1426.664     | C <sub>7</sub> H <sub>8</sub> NO <sub>2</sub>  | 138.055      | M <sub>2</sub> <sup>+</sup> - HexNAcHex   | 1678.252     |
|                   |              | C <sub>6</sub> H <sub>10</sub> NO <sub>3</sub> | 144.066      | Pep <sub>1</sub> <sup>+</sup>             | 1977.023     |
|                   |              | HexNAc-18                                      | 186.077      | Pep+HexNAc <sub>2</sub> <sup>+</sup>      | 1090.557     |
|                   |              | Hex-36                                         | 127.038      | Pep+2HexNAcHex <sub>2</sub> <sup>+</sup>  | 1273.122     |
|                   |              | Hex-18                                         | 145.050      | Pep+2HexNAcHex <sub>3</sub> <sup>+</sup>  | 849.089      |
|                   |              | Hex                                            | 163.061      | Pep+2HexNAc2Hex <sub>2</sub> <sup>+</sup> | 1354.148     |
|                   |              | 2Hex                                           | 325.114      | Pep+2HexNAc3Hex <sub>2</sub> <sup>+</sup> | 1435.177     |
|                   |              | HexNAc-36                                      | 168.066      | Pep+2HexNAc5Hex <sub>2</sub> <sup>+</sup> | 1597.214     |
|                   |              | HexNAc                                         | 204.087      |                                           |              |
|                   |              | HexNAcHex                                      | 366.140      |                                           |              |
|                   |              | HexNAc2Hex                                     | 528.194      |                                           |              |
|                   |              | HexNAc3Hex                                     | 690.247      |                                           |              |
|                   |              | 2HexNAc2Hex                                    | 731.273      |                                           |              |

**T618**

Sample = SARS-COV-2 Virus S\_deglycan\_O18\_Lytic\_semi\_780 2021-4-11

Sequence = LYQDVNCTEVPV;

Mods = Deamidated/2.9883; OGlycan/203.0794/HexNAc(1)

z=2

Error (ppm) = 0.47

Retention Time (min) = 101.36

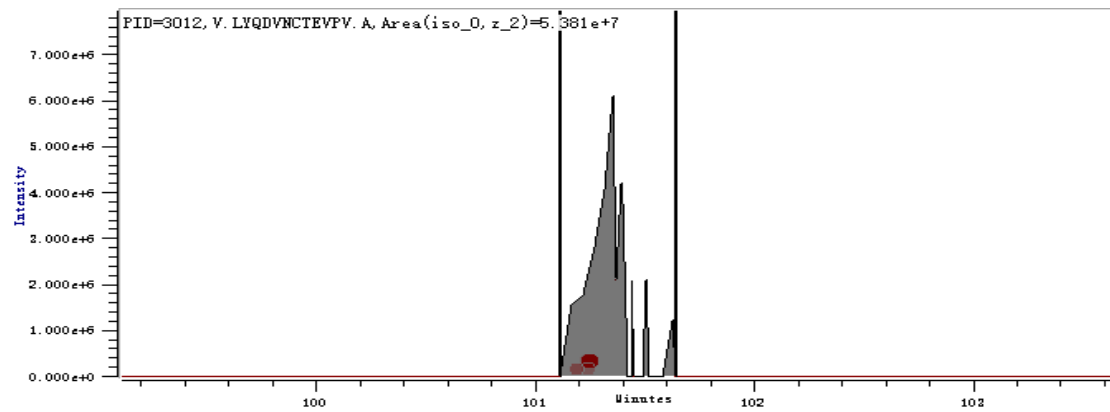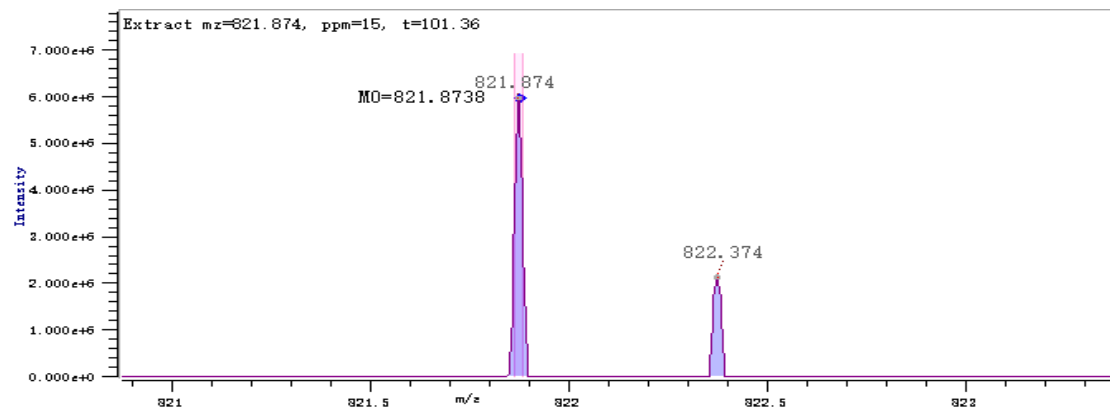

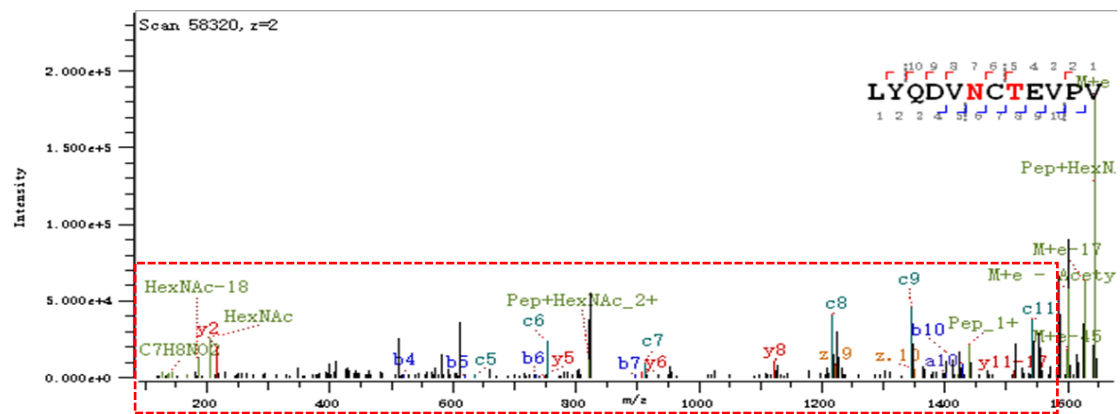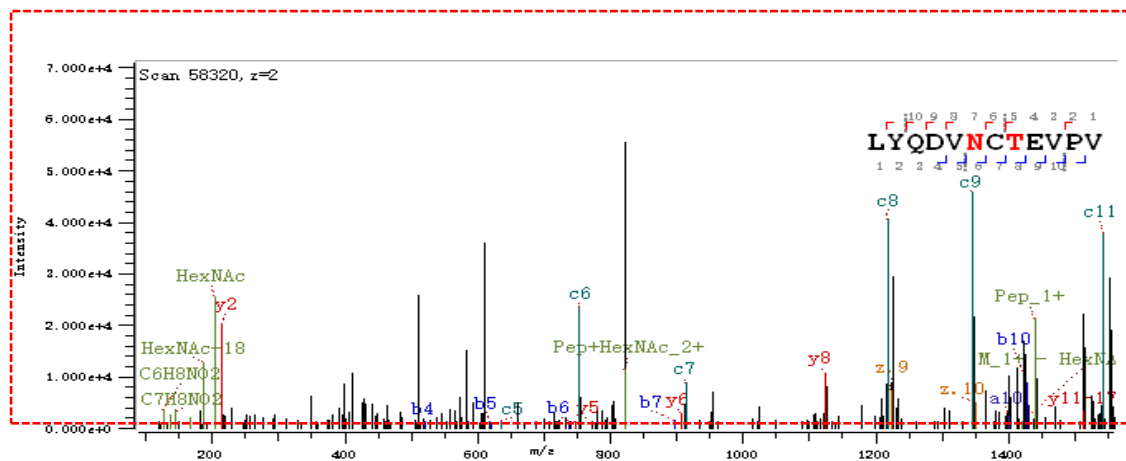

| Diagnostic ions | observed m/z | B ions    | observed m/z | Y ions           | observed m/z |
|-----------------|--------------|-----------|--------------|------------------|--------------|
| b6              | 736.343      | C6H8NO2   | 126.055      | M_1+ - HexNAC-18 | 1421.651     |
| b7              | 896.369      | C7H8NO2   | 138.055      | Pep_1+           | 1439.661     |
| y5              | 747.381      | C6H10NO3  | 144.066      | Pep+HexNAC_1+    | 1642.751     |
| y6              | 907.403      | HexNAC-36 | 168.065      |                  |              |
| c5              | 636.332      | HexNAC-18 | 186.075      |                  |              |
| c6              | 753.366      | HexNAC    | 204.086      |                  |              |
| c7              | 913.396      |           |              |                  |              |
| c8              | 1217.522     |           |              |                  |              |

S659

Sample = SARS-COV-2 Virus S\_deglycan\_O18\_trypsin\_semi\_780 2021-4-11

Sequence = AGCLIGAEHVNNSYECDIPIGAGICASYQTQTNSPR;

Mods = Deamidated/2.9883; OGlycan/656.2276/HexNAc(1)Hex(1)NeuAc(1)

z=4

Error (ppm) = -0.81

Retention Time (min) = 130.90

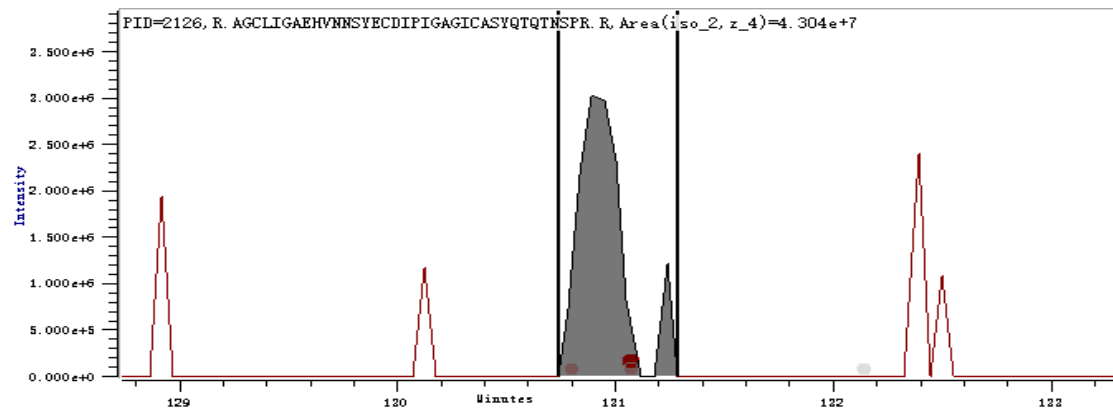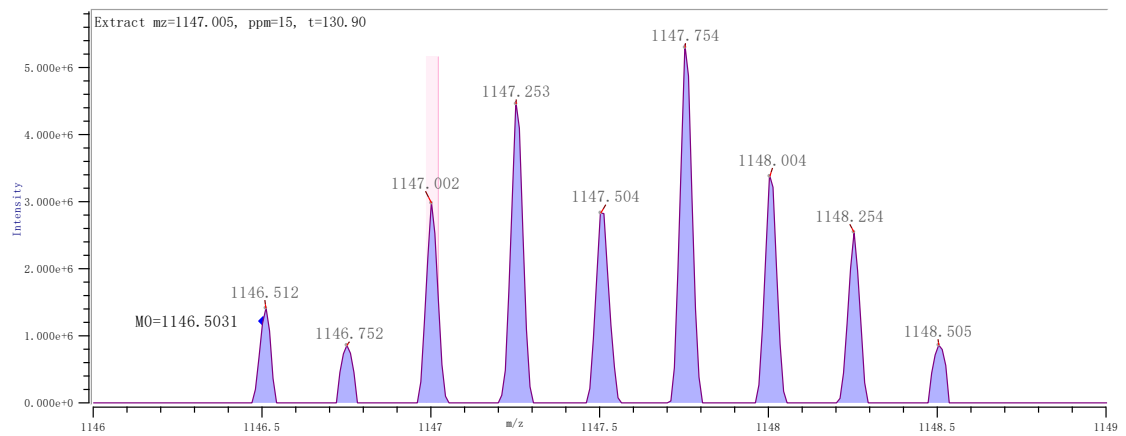

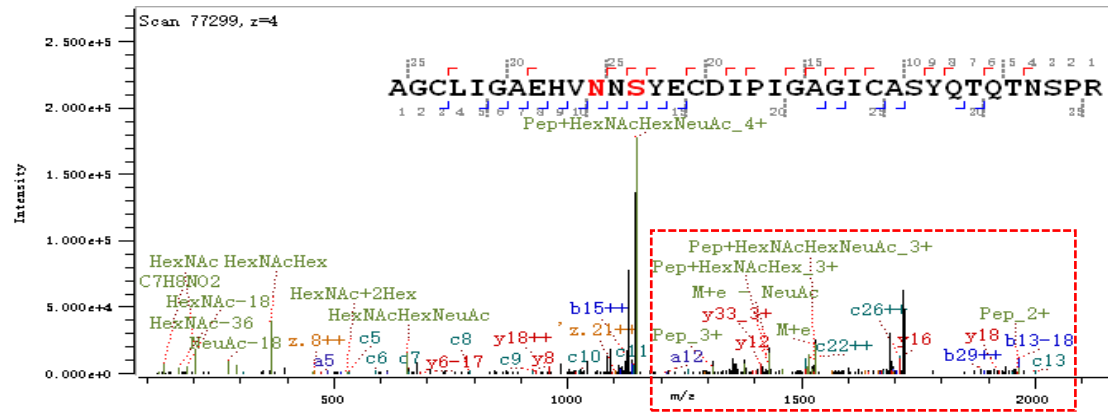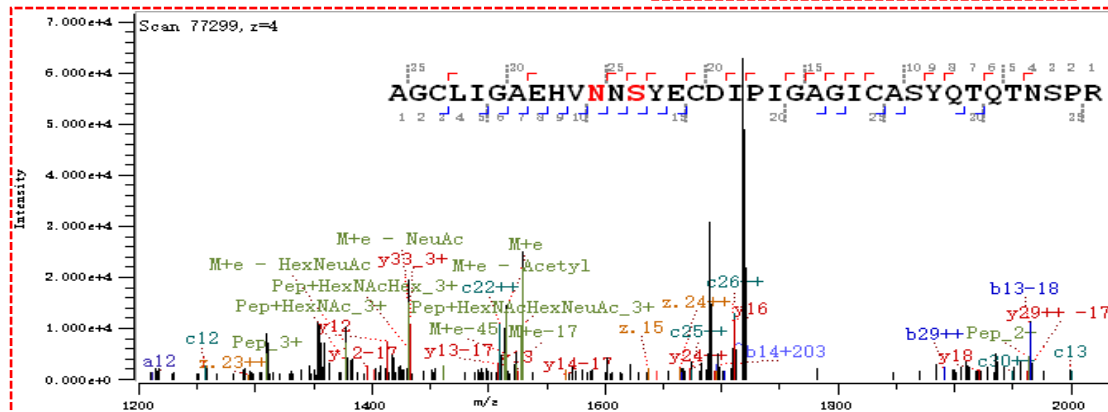

| Diagnostic ions | observed m/z | B ions       | observed m/z | Y ions                     | observed m/z |
|-----------------|--------------|--------------|--------------|----------------------------|--------------|
| c10             | 1025.518     | C6H8NO2      | 126.055      | Pep_2+                     | 1963.879     |
| c11             | 1142.545     | C7H8NO2      | 138.055      | Pep_3+                     | 1309.595     |
| c12             | 1256.602     | HexNAc-36    | 168.065      | Pep+HexNAc_3+              | 1377.291     |
| c13             | 1999.874     | HexNAc-18    | 186.075      | Pep+HexNAcHex_3+           | 1431.305     |
| y24++           | 1672.756     | HexNAc       | 204.086      | Pep+ HexNAcHexNeuAc<br>_3+ | 1528.355     |
| z23++           | 1293.069     | HexNAcHex    | 366.139      | Pep+ HexNAcHexNeuAc<br>_4+ | 1146.531     |
| z24++           | 1664.761     | HexNAcHexNeu | 657.236      |                            |              |

|  |  |          |         |  |  |
|--|--|----------|---------|--|--|
|  |  | Ac       |         |  |  |
|  |  | HexNeuAc | 454.157 |  |  |
|  |  | NeuAc-18 | 274.092 |  |  |
|  |  | NeuAc    | 292.103 |  |  |

**T696**

Sample = SARS-COV-2 Virus S\_deglycan\_O18\_chymotrypsin\_semi\_780 2021-4-11

Sequence = TMSLGAENSVAY; Mods = OGlycan/203.0794/HexNAc(1)

z=2

Error (ppm) = 0.73

Retention Time (min) = 82.16

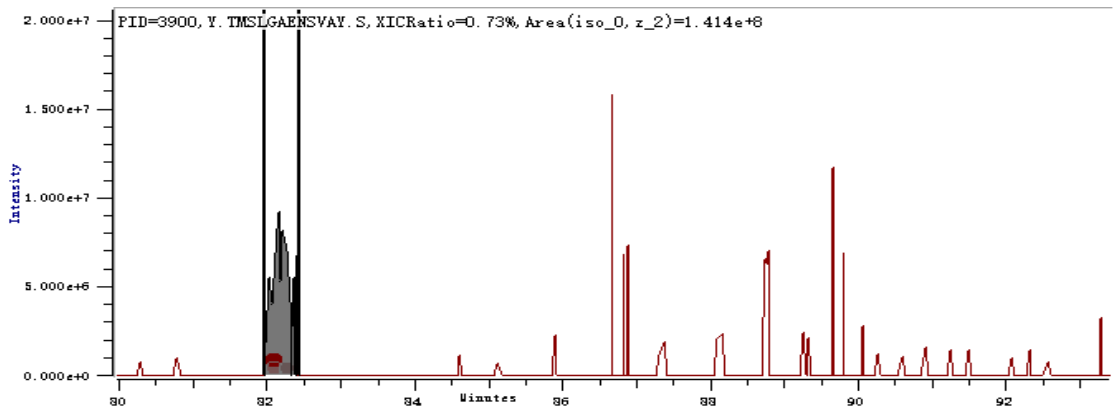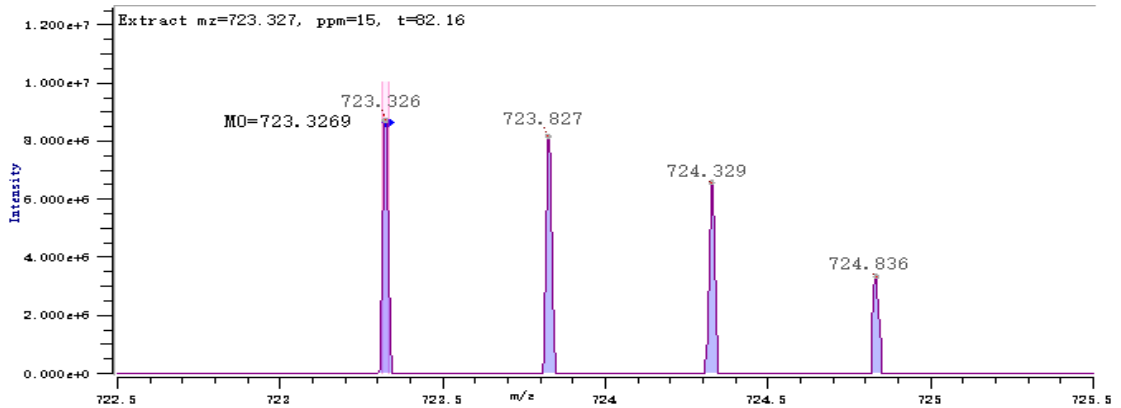

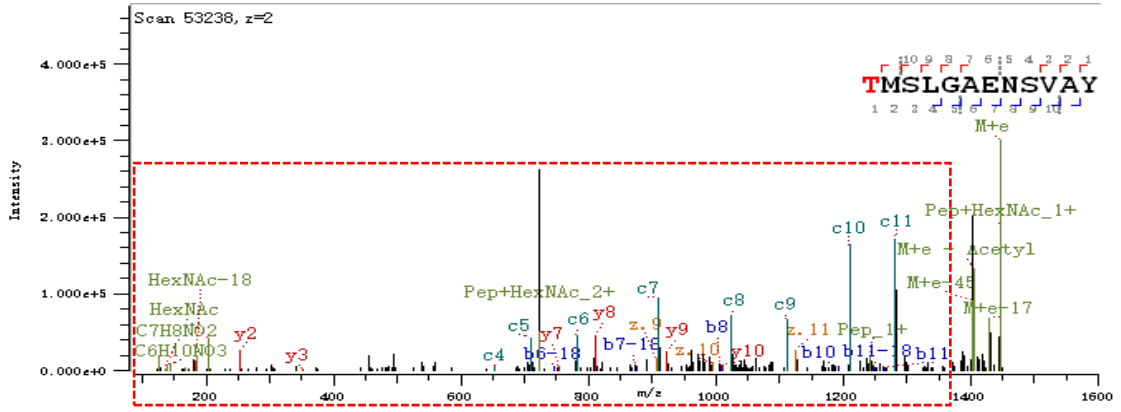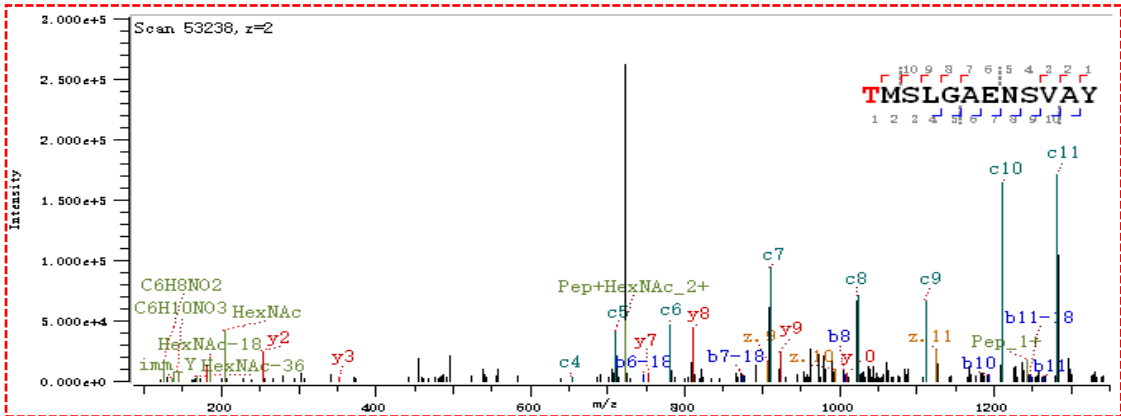

| Diagnostic ions | observed m/z | B ions    | observed m/z | Y ions        | observed m/z |
|-----------------|--------------|-----------|--------------|---------------|--------------|
| y10             | 1010.473     | C6H8NO2   | 126.055      | Pep_1+        | 1242.564     |
| z10             | 994.459      | C7H8NO2   | 138.055      | Pep+HexNAc_1+ | 1445.666     |
| z11             | 1125.501     | C6H10NO3  | 144.065      | Pep+HexNAc_2+ | 723.388      |
|                 |              | HexNAc-36 | 168.065      |               |              |
|                 |              | HexNAc-18 | 186.075      |               |              |
|                 |              | HexNAc    | 204.086      |               |              |

Sample = 4th virus Lytic HCD20 N+O using 6 most O 2021-7-3

Sequence = TEILPV; Mods = OGlycan/203.0794/HexNac(1)

z=1

Error (ppm) = 2.11

Retention Time (min) = 62.68

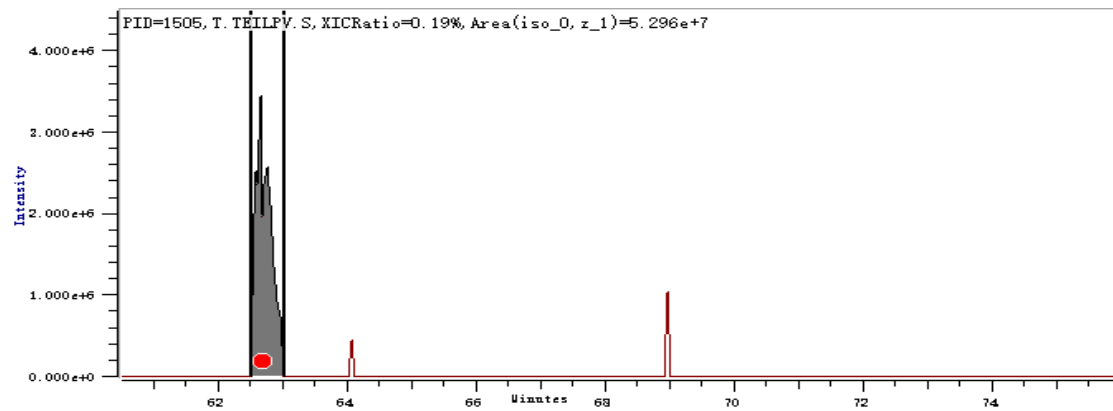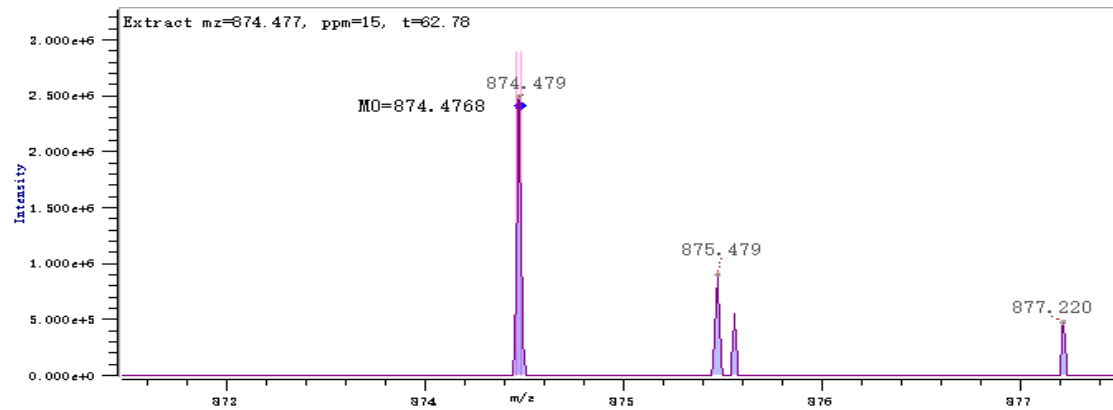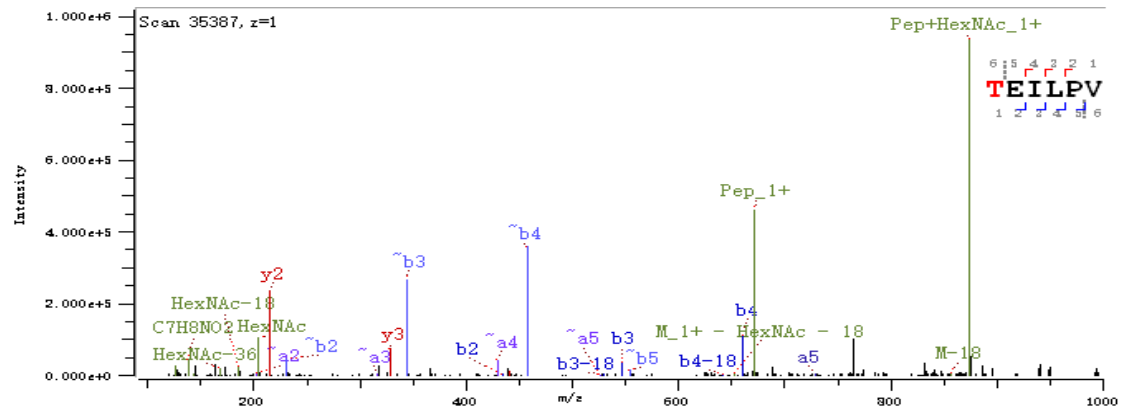

| Diagnostic | observed | B ions | observed m/z | Y ions | observed m/z |
|------------|----------|--------|--------------|--------|--------------|
|------------|----------|--------|--------------|--------|--------------|



| ions | m/z     |           |         |                  |         |
|------|---------|-----------|---------|------------------|---------|
| ~b2  | 231.098 | C6H8NO2   | 126.055 | M_1+ - HexNAc-18 | 653.380 |
| ~a2  | 203.103 | C7H8NO2   | 138.055 | Pep+HexNAc_1+    | 874.480 |
| a2   | 406.171 | C6H10NO3  | 144.065 | Pep_1+           | 671.397 |
|      |         | HexNAc-36 | 168.065 |                  |         |
|      |         | HexNAc-18 | 186.075 |                  |         |
|      |         | HexNAc    | 204.086 |                  |         |

### T1076

Sample = 4th virus trypsin stepHCD20 N+O using 6 most O 2021-6-29

Sequence = NFFTAPAICHDGK;

Mods=NGlycan/1200.4279; Oglycan/656.2276/HexNAc(2)Hex(4)Fuc(1),HexNAc(1)Hex(1)NeuAc(1)

z=3

Error (ppm) = 2.58

Retention Time (min) = 20.21

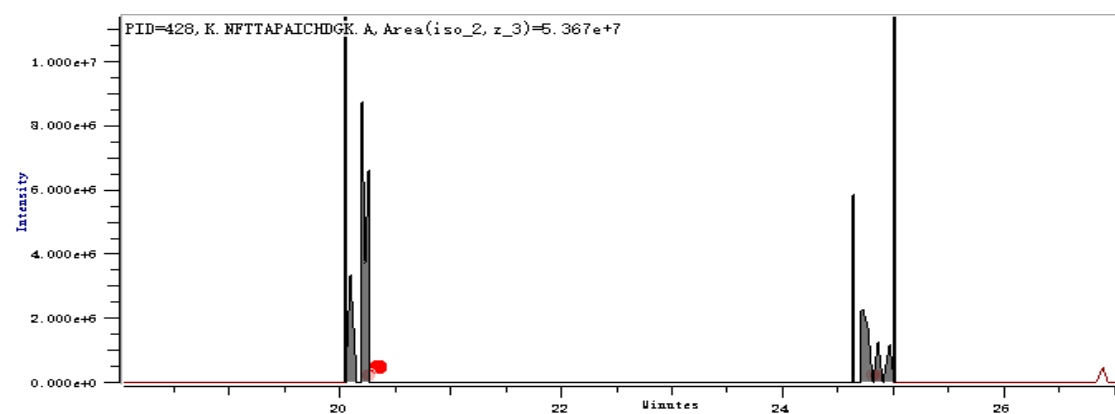

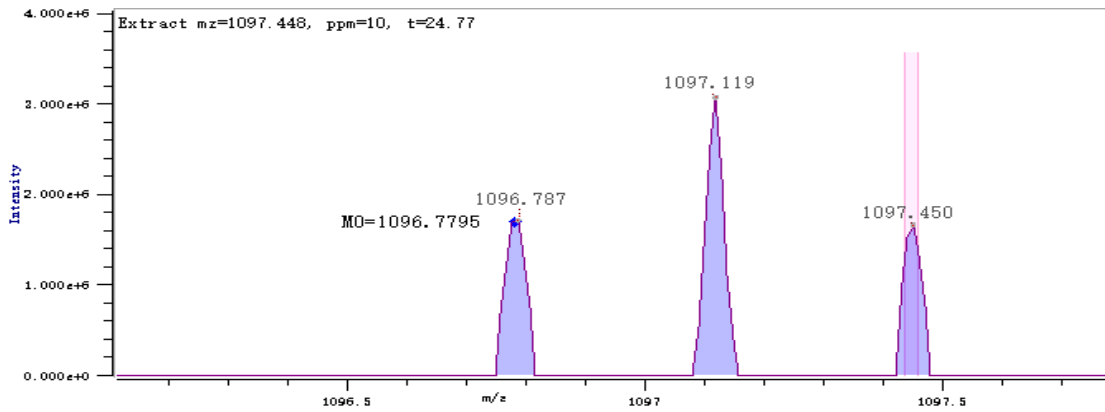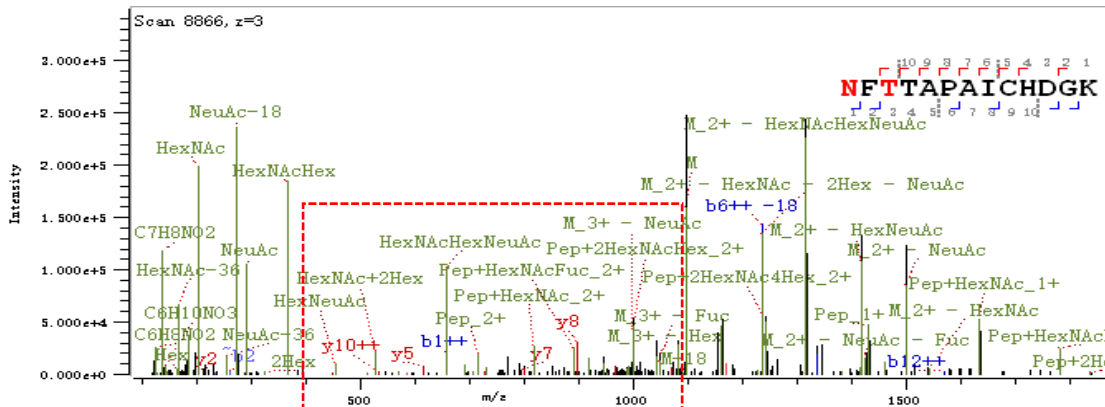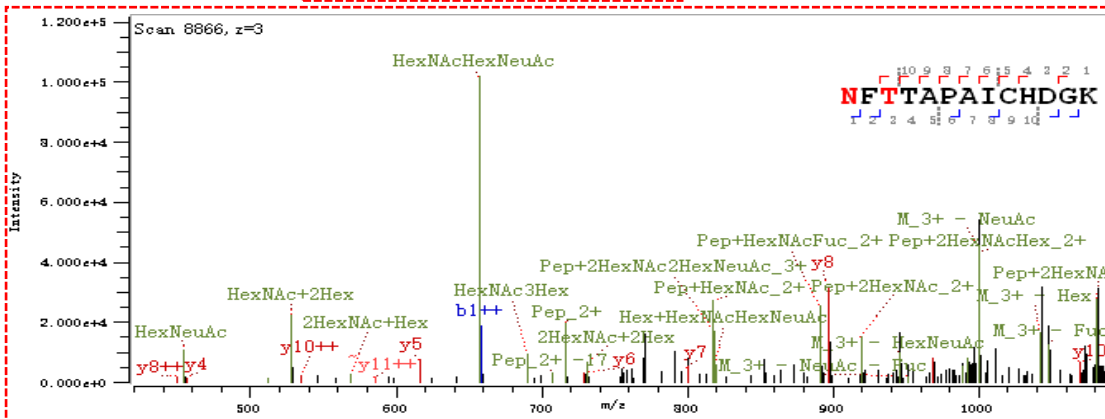

| Diagnostic ions | observed m/z | B ions   | observed m/z | Y ions                      | observed m/z |
|-----------------|--------------|----------|--------------|-----------------------------|--------------|
| b1++            | 658.241      | C6H8NO2  | 126.055      | M - 18                      | 1090.767     |
| b2              | 1462.618     | C7H8NO2  | 138.055      | M                           | 1096.783     |
| y10++           | 535.256      | C6H10NO3 | 144.065      | M <sub>2+</sub> - HexNAcHex | 1462.105     |

|     |          |                   |         |                         |          |
|-----|----------|-------------------|---------|-------------------------|----------|
| y10 | 1069.511 | Hex-36            | 127.038 | M_2+ - HexNAcHexNeuAc   | 1316.555 |
|     |          | Hex-18            | 145.050 | M_2+ - HexNAc2Hex NeuAc | 1235.529 |
|     |          | Hex               | 163.061 | M_2+ - HexNeuAc         | 1418.096 |
|     |          | 2Hex              | 325.114 | M_3+ - HexNeuAc         | 945.733  |
|     |          | HexNAc-36         | 168.065 | M_2+ - NeuAcFuc         | 1426.093 |
|     |          | HexNAc-18         | 186.075 | M_3+ - NeuAcFuc         | 951.064  |
|     |          | HexNAc            | 204.086 | M_2+ - NeuAc            | 1499.123 |
|     |          | HexNAcHex         | 366.140 | M_3+ - NeuAc            | 999.751  |
|     |          | HexNAc2Hex        | 528.194 | M_3+ - 2Hex             | 988.745  |
|     |          | HexNAc3Hex        | 690.248 | M_3+ - Hex              | 1042.765 |
|     |          | 2HexNAcHex        | 569.222 | M_3+ - Fuc              | 1048.096 |
|     |          | 2HexNAc2Hex       | 731.275 | Pep_2+ - 17             | 707.831  |
|     |          | HexNeuAc          | 454.158 | Pep_2+                  | 716.340  |
|     |          | HexNAcHexNeuAc    | 657.237 | Pep_1+ - 17             | 1414.648 |
|     |          | HexHexNAcFuc      | 512.199 | Pep_1+                  | 1431.671 |
|     |          | HexHexNAcHexNeuAc | 819.290 | Pep+HexNAc_1+           | 1634.752 |
|     |          | NeuAc-36          | 256.082 | Pep+HexNAc_2+           | 817.880  |
|     |          | NeuAc-18          | 274.093 | Pep+2HexNAc_1+          | 1837.821 |
|     |          | NeuAc             | 292.104 | Pep+2HexNAc_2+          | 919.419  |
|     |          |                   |         | Pep+2HexNAcHex_2+       | 1000.424 |
|     |          |                   |         | Pep+2HexNAc2Hex_2+      | 1081.472 |
|     |          |                   |         | Pep+2HexNAc3Hex_2+      | 1162.499 |

|  |  |  |  |                         |          |
|--|--|--|--|-------------------------|----------|
|  |  |  |  | Pep+2HexNAc4Hex_2+      | 1243.527 |
|  |  |  |  | Pep+HexNAcFuc_2+        | 890.909  |
|  |  |  |  | Pep+HexNAcFuc_1+        | 1780.812 |
|  |  |  |  | Pep+2HexNAcFuc_2+       | 992.446  |
|  |  |  |  | Pep+2HexNAc2HexNeuAc_2+ | 1227.025 |
|  |  |  |  | Pep+2HexNAc2HexNeuAc_3+ | 818.381  |

**T1077**

Sample = 2nd virus trypsin N+O search

Sequence = NFFTAPAICHDGK;

Mods=NGlycan/1200.4279; OGlycan/656.2276/HexNAc(2)Hex(4)Fuc(1),HexNAc(1)Hex(1)NeuAc(1)

z=3

Error (ppm) = 0.02

Retention Time (min) = 41.31

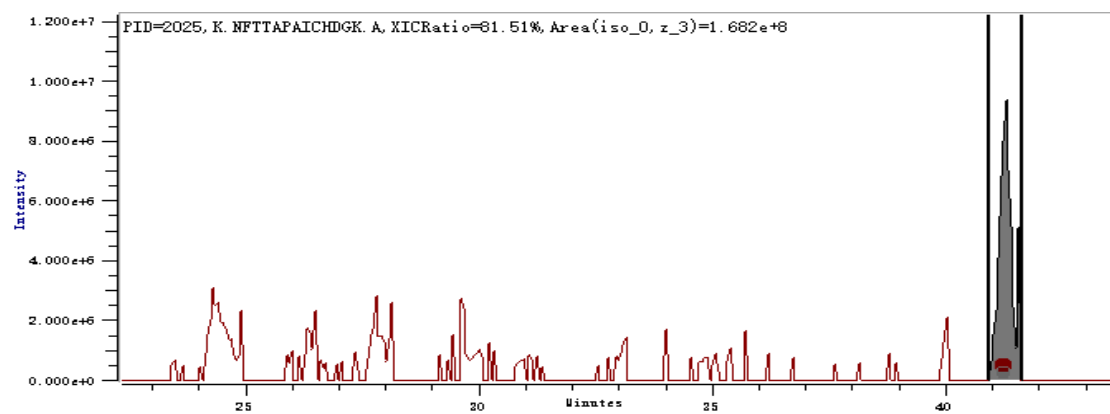

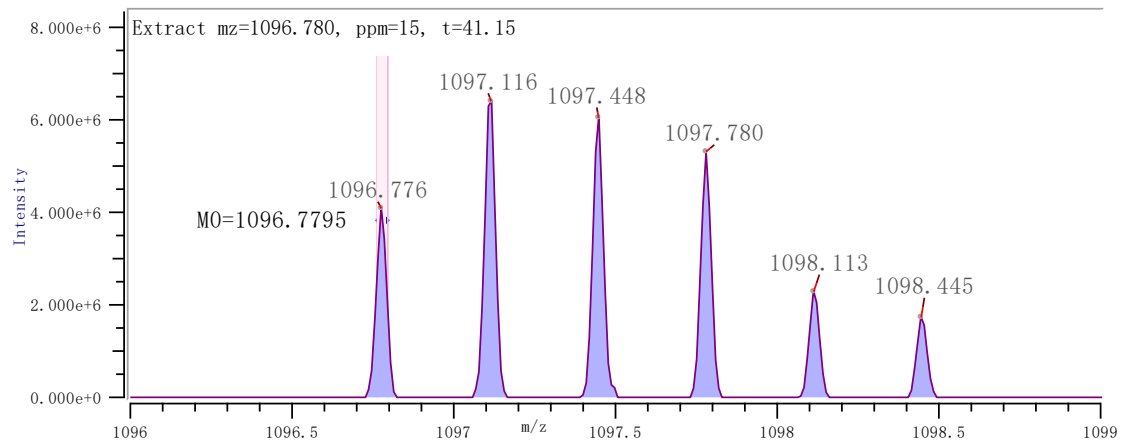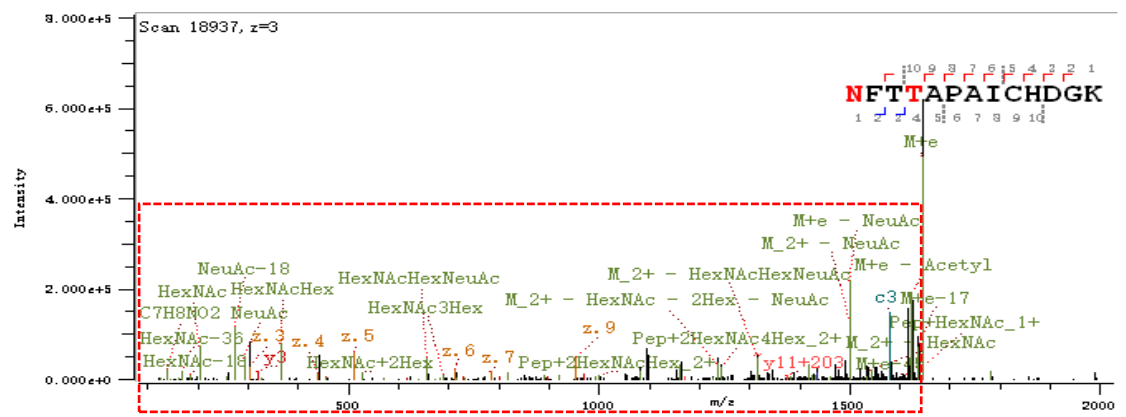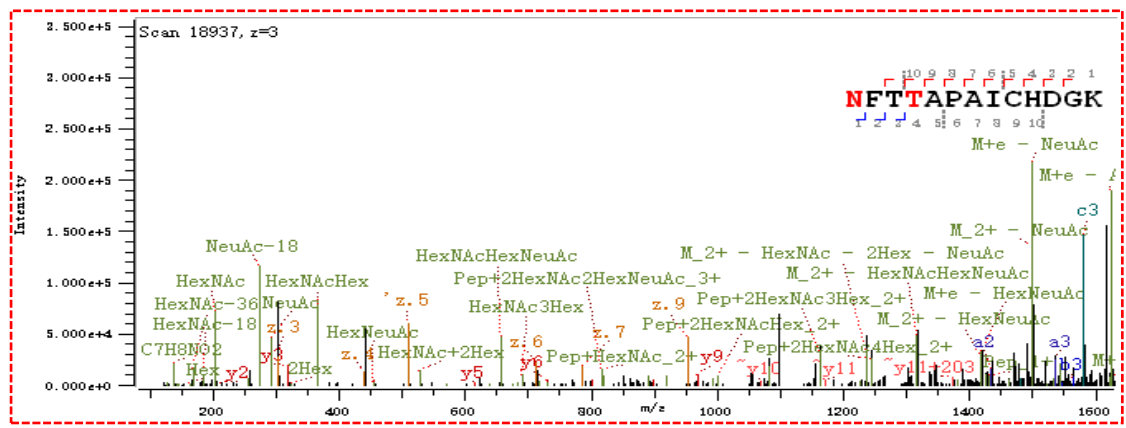

| Diagnostic ions | observed | B ions  | observed | Y ions                            | observed |
|-----------------|----------|---------|----------|-----------------------------------|----------|
|                 | m/z      |         | m/z      |                                   | m/z      |
| c3              | 1580.626 | C6H8NO2 | 126.055  | M <sub>2+</sub> - HexNAc2HexNeuAc | 1235.524 |

|          |          |                       |         |                         |          |
|----------|----------|-----------------------|---------|-------------------------|----------|
| a3       | 1535.616 | C7H8NO2               | 138.055 | M_2+ - HexNAcHexNeuAc   | 1316.549 |
| ~y11+203 | 1373.632 | C6H10NO3              | 144.065 | M_2+ - HexNAc           | 1543.117 |
|          |          | Hex-18                | 145.049 | M_2+ - HexNAc -18       | 1534.117 |
|          |          | Hex                   | 163.061 | M_2+ - HexNeuAc         | 1418.090 |
|          |          | 2Hex                  | 325.112 | M_2+ - NeuAcFuc         | 1426.087 |
|          |          | HexNAc-36             | 168.065 | M_2+ - NeuAc            | 1499.116 |
|          |          | HexNAc-18             | 186.076 | Pep_1+                  | 1431.663 |
|          |          | HexNAc                | 204.086 | Pep_2+                  | 716.336  |
|          |          | HexNAcHex             | 366.139 | Pep+HexNAc_1+           | 1634.747 |
|          |          | HexNAc2Hex            | 528.192 | Pep+HexNAc_2+           | 817.876  |
|          |          | HexNAc3Hex            | 690.244 | Pep+2HexNAcHex_2+       | 1000.442 |
|          |          | 2HexNAcHex            | 569.216 | Pep+2HexNAc2Hex_2+      | 1081.468 |
|          |          | 2HexNAc2Hex           | 731.270 | Pep+2HexNAc3Hex_2+      | 1162.495 |
|          |          | HexNAcHexNeuAc-<br>18 | 639.224 | Pep+2HexNAc4Hex_2+      | 1243.522 |
|          |          | HexNAcHexNeuAc        | 657.234 | Pep+HexNAcFuc_1+        | 1780.802 |
|          |          | HexHexNAcHex<br>NeuAc | 819.287 | Pep+HexNAcFuc_2+        | 890.904  |
|          |          | HexNeuAc              | 454.155 | Pep+2HexNAcFuc_2+       | 992.444  |
|          |          | HexNAc2HexFuc         | 674.246 | Pep+2HexNAc2HexNeuAc_2+ | 1227.021 |
|          |          | NeuAc-36              | 256.081 |                         |          |
|          |          | NeuAc-18              | 274.092 |                         |          |

|  |  |       |         |  |  |
|--|--|-------|---------|--|--|
|  |  | NeuAc | 292.102 |  |  |
|--|--|-------|---------|--|--|

**S1097**

Sample = 4th virus chymotrypsin stepHCD25 N+O using 6 most O 2021-6-29

Sequence=VSNQTHWF;

Mods=OGlycan/365.1322;NGlycan/1378.4757/HexNAc(2)Hex(6),HexNAc(1)Hex(1)

z=2

Error (ppm) = 2.88

Retention Time (min) = 18.86

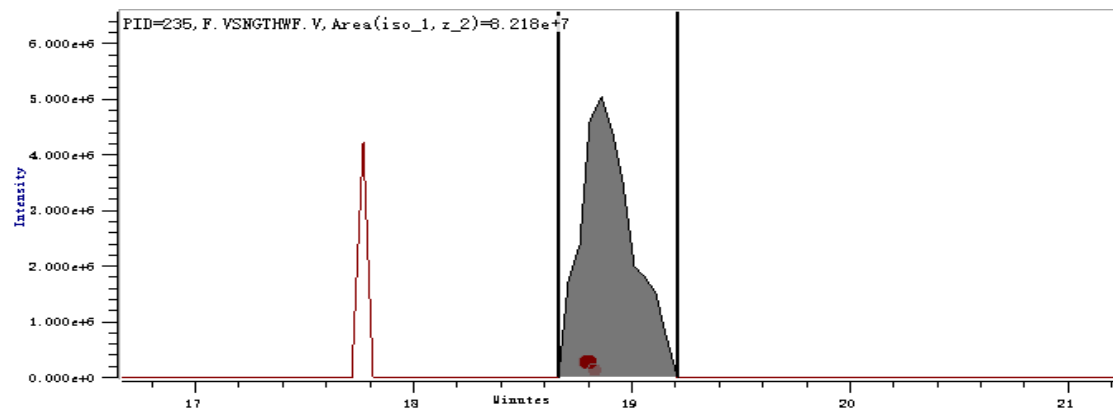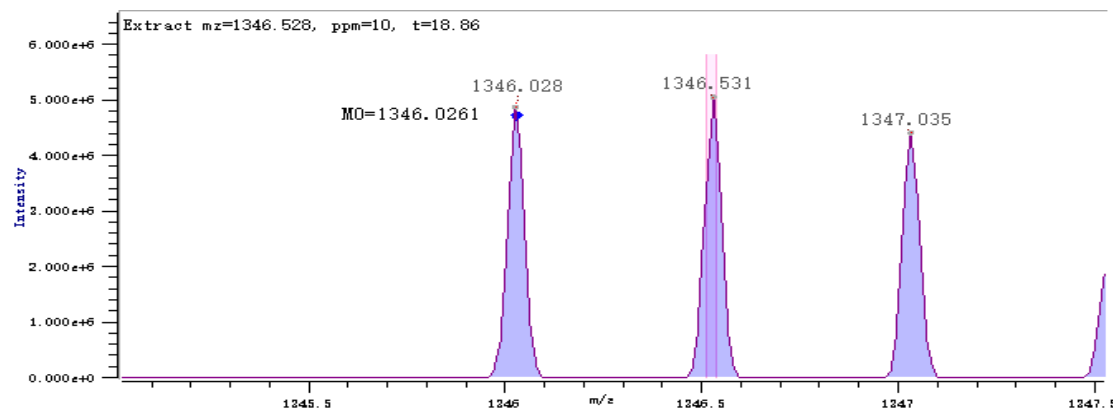

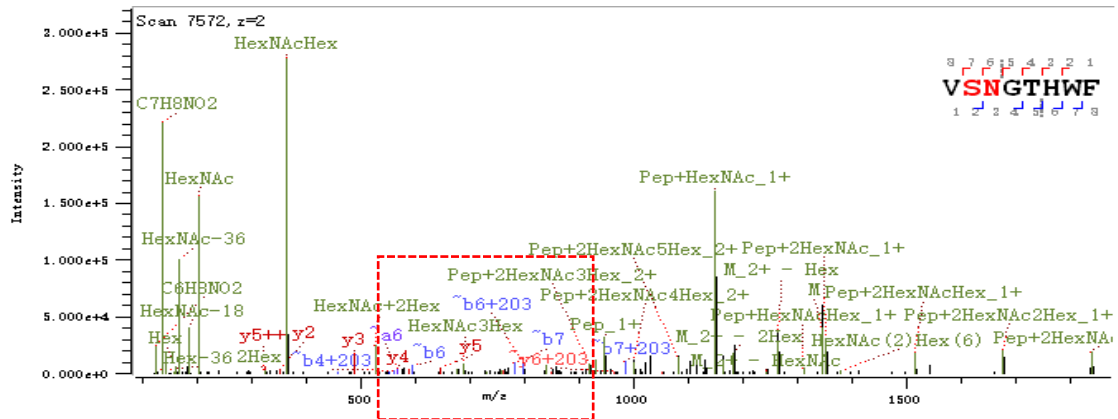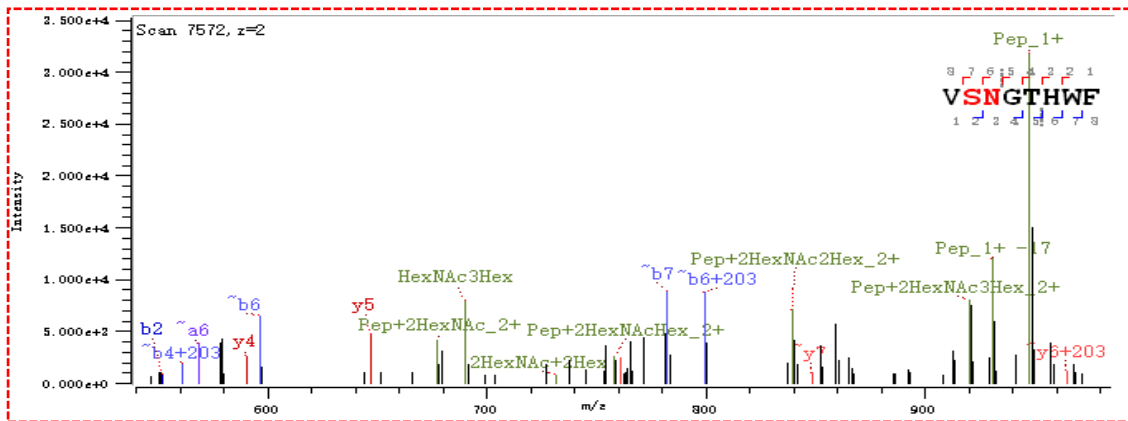

| Diagnostic ions | observed<br>m/z | B ions    | observed<br>m/z | Y ions                      | observed<br>m/z |
|-----------------|-----------------|-----------|-----------------|-----------------------------|-----------------|
| b2              | 552.254         | C6H8NO2   | 126.055         | M                           | 1346.028        |
| y4              | 590.274         | C7H8NO2   | 138.055         | M <sub>2+</sub> - HexNAcHex | 1163.461        |
| y5              | 647.295         | C6H10NO3  | 144.066         | M <sub>2+</sub> - HexNAc    | 1244.477        |
| ~y6+203         | 964.419         | Hex-36    | 127.039         | M <sub>2+</sub> - 2Hex      | 1183.974        |
|                 |                 | Hex-18    | 145.050         | M <sub>2+</sub> - Hex       | 1265.010        |
|                 |                 | Hex       | 163.066         | Pep <sub>1+</sub> - 17      | 930.413         |
|                 |                 | 2Hex      | 325.114         | Pep <sub>1+</sub>           | 947.438         |
|                 |                 | HexNAc-36 | 168.061         | Pep+HexNAc <sub>1+</sub>    | 1150.518        |



|  |  |              |          |                    |          |
|--|--|--------------|----------|--------------------|----------|
|  |  | HexNAc-18    | 186.077  | Pep+HexNAcHex_1+   | 1312.573 |
|  |  | HexNAc       | 204.087  | Pep+2HexNAc_1+     |          |
|  |  | HexNAcHex    | 366.141  | Pep+2HexNAc_2+     |          |
|  |  | HexNAc+2Hex  | 528.194  | Pep+2HexNAcHex_1+  | 1515.649 |
|  |  | HexNAc3Hex   | 690.247  | Pep+2HexNAcHex_2+  | 758.330  |
|  |  | 2HexNAc+2Hex | 731.276  | Pep+2HexNAc2Hex_1+ | 1677.701 |
|  |  | 2HexNAc6Hex  | 1379.485 | Pep+2HexNAc2Hex_2+ | 839.356  |
|  |  |              | 1353.597 | Pep+2HexNAc3Hex_1+ | 1839.755 |
|  |  |              | 677.303  | Pep+2HexNAc3Hex_2+ | 920.382  |
|  |  |              |          | Pep+2HexNAc4Hex_2+ | 1001.409 |
|  |  |              |          | Pep+2HexNAc5Hex_2+ | 1082.435 |

**T1100**

Sample = 4th virus chymotrypsin HCDpdETHcD27 N+O using 6 most O 2021-6-29

Sequence = VSNGTHWF;

Mods = NGlycan/1378.4757; OGlycan/656.2276/HexNAc(2)Hex(6),HexNAc(1)Hex(1)NeuAc(1)

z=3

Error (ppm) = 2.77

Retention Time (min) = 36.85

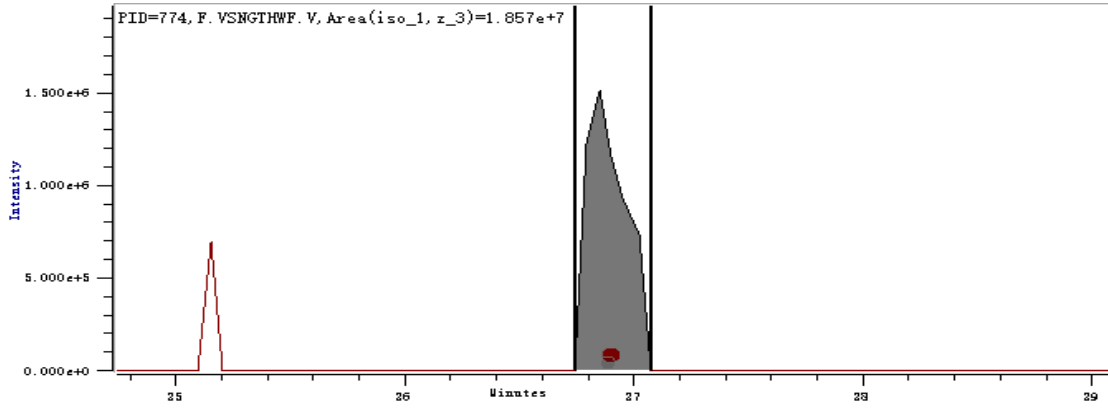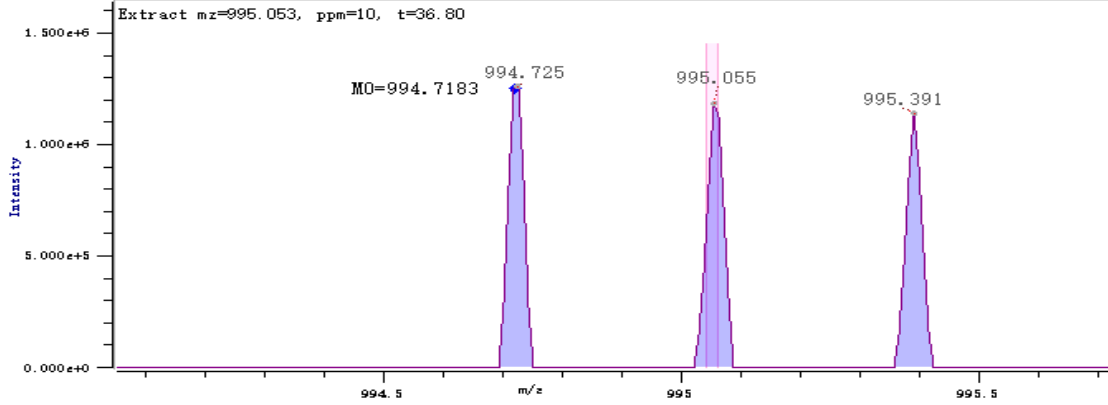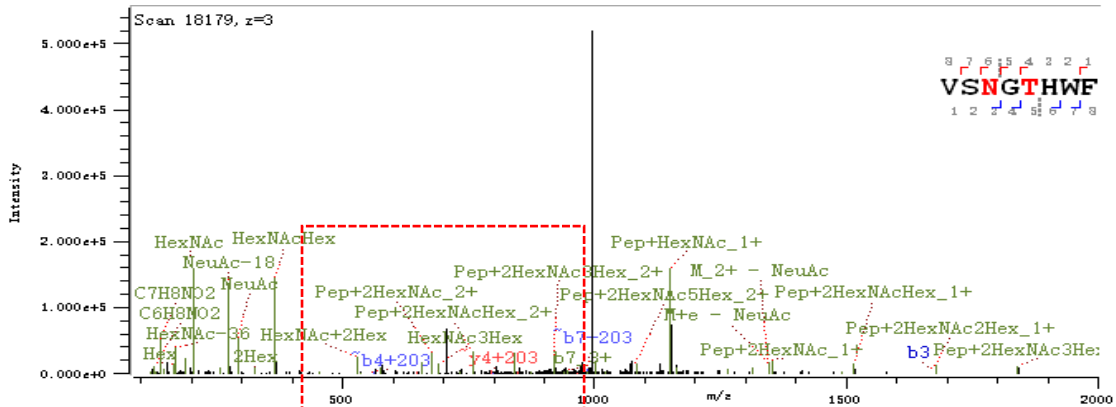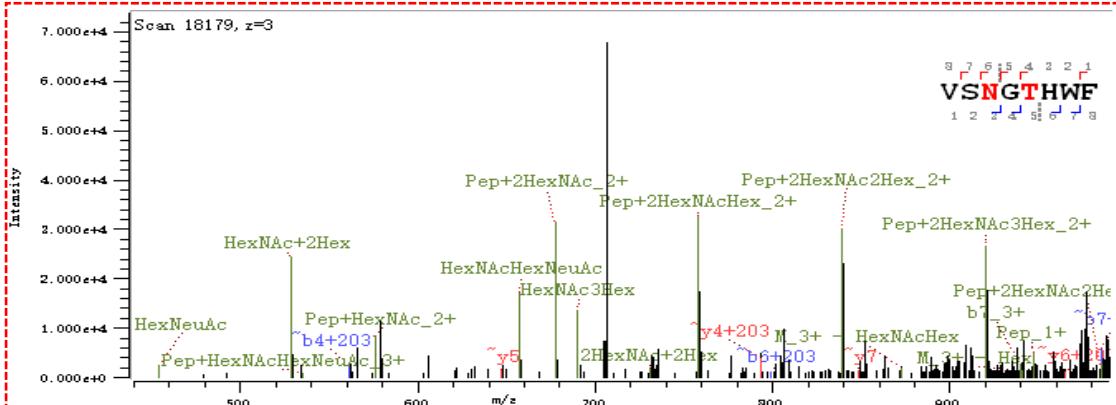

| Diagnostic ions | observed m/z | B ions           | observed m/z | Y ions                | observed m/z |
|-----------------|--------------|------------------|--------------|-----------------------|--------------|
| b3              | 1679.706     | C6H8NO2          | 126.055      | M_3+ - Hex            | 940.789      |
| ~y4+203         | 793.388      | C7H8NO2          | 138.055      | M_3+ - HexNAcHex      | 872.930      |
|                 |              | C6H10NO3         | 144.066      | M_2+ - HexNAcHexNeuAc | 1163.459     |
|                 |              | Hex-36           | 127.038      | M_2+ - HexNeuAc       | 1284.996     |
|                 |              | Hex              | 163.061      | M_2+ - NeuAc          | 1346.023     |
|                 |              | 2Hex             | 325.114      | Pep_1+                | 947.437      |
|                 |              | HexNAc-36        | 168.060      | Pep+HexNAc_1+         | 1150.515     |
|                 |              | HexNAc-18        | 186.076      | Pep+HexNAc_2+         | 575.763      |
|                 |              | HexNAc           | 204.087      | Pep+2HexNAc_1+        | 1353.594     |
|                 |              | HexNeuAc         | 454.157      | Pep+2HexNAc_2+        | 677.362      |
|                 |              | HexNAcHex        | 366.140      | Pep+HexNAcHex_1+      | 1312.566     |
|                 |              | HexNAc2Hex       | 528.193      | Pep+HexNAcHexNeuAc_3+ | 535.225      |
|                 |              | HexNAc3Hex       | 690.246      | Pep+2HexNAcHex_1+     | 1515.645     |
|                 |              | 2HexNAc2Hex      | 731.271      | Pep+2HexNAcHex_2+     | 758.328      |
|                 |              | 2HexNAc2HexNeuAc | 1022.422     | Pep+2HexNAc2Hex_1+    | 1677.698     |
|                 |              | HexNAcHexNeuAc   | 657.236      | Pep+2HexNAc2Hex_2+    | 839.354      |
|                 |              | NeuAc-36         | 256.082      | Pep+2HexNAc3Hex_1+    | 1839.074     |
|                 |              | NeuAc-18         | 274.093      | Pep+2HexNAc3Hex_2+    | 920.381      |

|  |  |       |         |                         |          |
|--|--|-------|---------|-------------------------|----------|
|  |  | NeuAc | 292.103 | Pep+2HexNAc4Hex_2+      | 1001.407 |
|  |  |       |         | Pep+2HexNAc5Hex_2+      | 1082.433 |
|  |  |       |         | Pep+2HexNAc2HexNeuAc_2+ | 984.956  |

**Fig. S3. The identification of 18 *O*- glycosites of the S protein extracted from SARS-CoV-2 virions.**

For each peptide/glycopeptide detected, the corresponding extracted ion chromatogram (XIC) (upper panel), precursor isotope distribution (middle panel), MS/MS spectrum with the enlarged view (lower panels) and Diagnostic ions, B, Y ions together with observed *m/z* (table) are shown.

The monoisotopic peak is marked as “MO=” with a blue dot (middle panel). The fragment b- and y-ions are in blue and red color, respectively; the c- and z-ions are in cyan and orange color, respectively. The oxonium ions are in green color. The spectrum outlined by the red dotted line is the enlarged view of the highlighted region in the MS/MS spectrum above. The *O*-glycosite of T236 determined only by a series of B ions and one diagnostic peak. The *O*-glycosites of S305 and T307 lack of fragment ions of NeuAc. These are weak candidates of OFN.

### **T618**

Sample = S-WT-TM-gluC-deglycan....byspec2\_20200930\_Byonic

Sequence = VNCTEVPVAIHAD; Mods = Deamidated/0.9840; OGlycan/609.2381/HexNAc(3)

*z*=2

Error (ppm) = -4.60

Retention Time (min) = 60.26

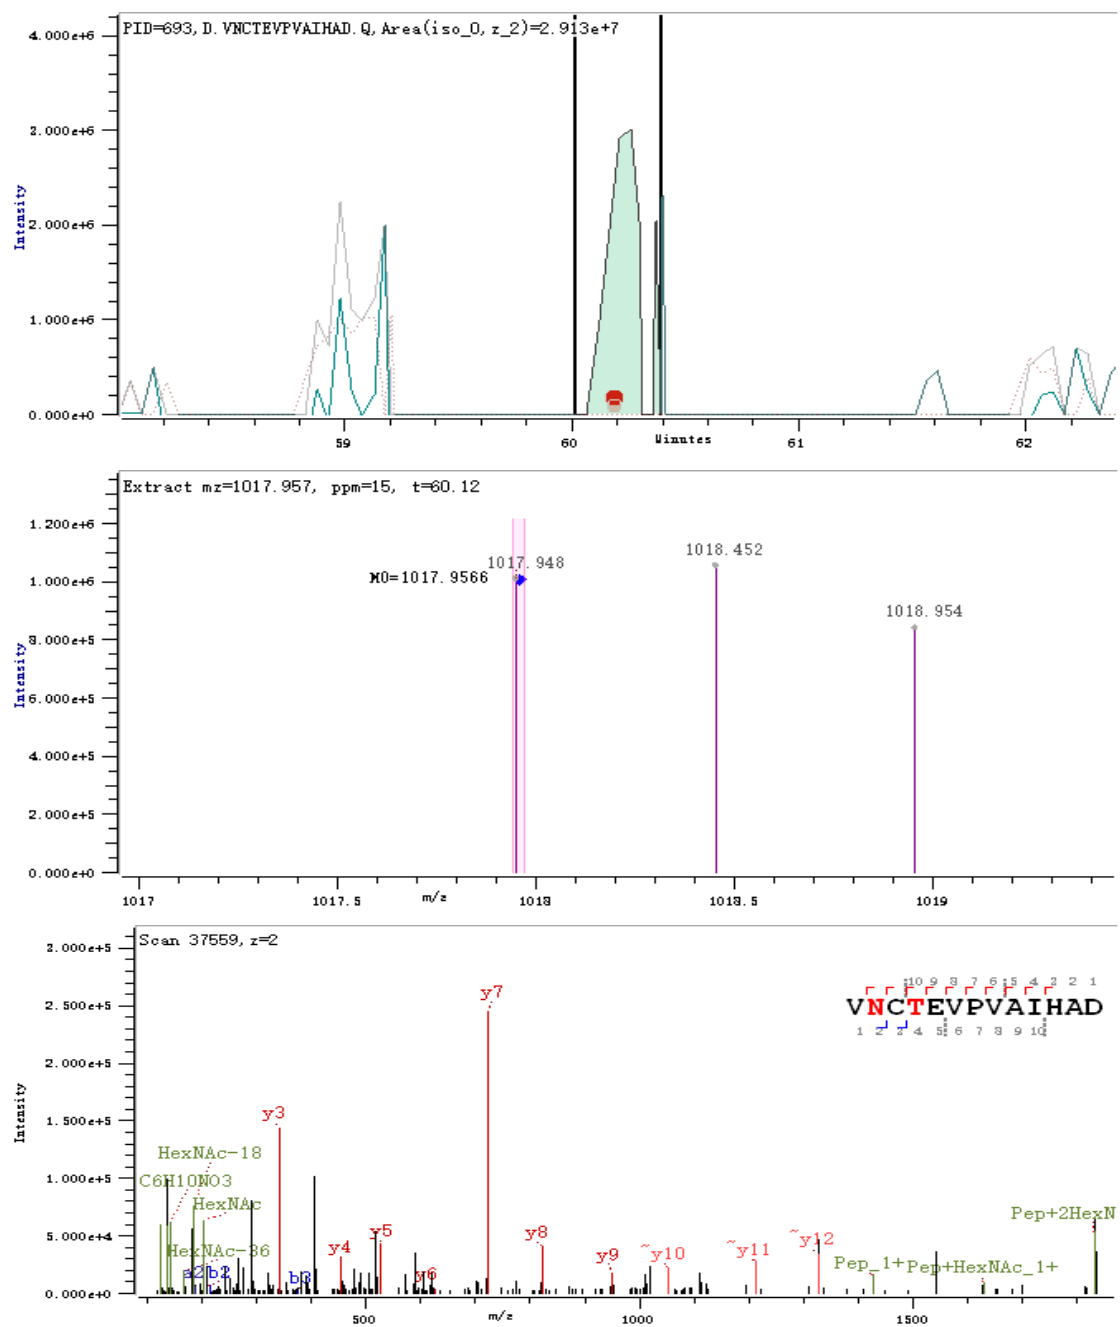

**Fig. S4. The identification of *O*- glycosites at T618 of the WT full length S protein purified from 293T cell.**

The corresponding extracted ion chromatogram (XIC) (upper panel), isotope distribution (middle panel), and MS/MS spectrum with the enlarged view (lower panels) are shown. The monoisotopic peak is marked as a blue dot (middle panel). The fragment b- and y-ions are in blue and red color, respectively; the c- and z-ions are in cyan and orange color, respectively. The oxonium ions are in green color.

Table S1. Overview of the identified *O*-glycosylation of the S protein extracted from SARS-CoV-2 virions.

| Identified <i>O</i> -glycosylation | Near <i>N</i> -sequon position (OFN) | <b>N,O glycosylation search together<sup>1</sup></b> | <b>Asn deamidation (+2.98Da)<sup>1</sup></b> | <b>Glycan or oxonium ion<sup>2</sup></b> | <b>Y ions<sup>2</sup></b> | <b>Precursor isotopic pattern<sup>2</sup></b> | <b>Correct retention time<sup>2</sup></b> | <b>Diagnostic ions for glycosites determination<sup>3</sup></b> | <b>Mutagenesis for OFN validation</b> |
|------------------------------------|--------------------------------------|------------------------------------------------------|----------------------------------------------|------------------------------------------|---------------------------|-----------------------------------------------|-------------------------------------------|-----------------------------------------------------------------|---------------------------------------|
| T22                                |                                      | ✓                                                    |                                              | ✓                                        | ✓                         | ✓                                             | ✓                                         | ✓                                                               |                                       |
| S305                               |                                      | ✓                                                    |                                              | ✓                                        | ✓                         | ✓                                             | ✓                                         |                                                                 |                                       |
| T307                               |                                      | ✓                                                    |                                              | ✓                                        | ✓                         | ✓                                             | ✓                                         |                                                                 |                                       |
| T323                               |                                      | ✓                                                    |                                              | ✓                                        | ✓                         | ✓                                             | ✓                                         | ✓                                                               |                                       |
| T696                               |                                      | ✓                                                    |                                              | ✓                                        | ✓                         | ✓                                             | ✓                                         | ✓                                                               |                                       |
| T724                               |                                      | ✓                                                    |                                              | ✓                                        | ✓                         | ✓                                             | ✓                                         | ✓                                                               |                                       |
| S60                                | ✓                                    | ✓                                                    |                                              | ✓                                        | ✓                         | ✓                                             | ✓                                         | ✓                                                               |                                       |
| T124                               | ✓                                    | ✓                                                    |                                              | ✓                                        | ✓                         | ✓                                             | ✓                                         | ✓                                                               |                                       |

|                   |   |   |   |   |   |   |   |   |   |
|-------------------|---|---|---|---|---|---|---|---|---|
| <b>S151</b>       | ✓ | ✓ |   | ✓ | ✓ | ✓ | ✓ | ✓ |   |
| <b>T236</b>       | ✓ | ✓ |   | ✓ |   | ✓ | ✓ | ✓ |   |
| <b>T604/ S605</b> | ✓ | ✓ |   | ✓ | ✓ | ✓ | ✓ |   |   |
| <b>T618</b>       | ✓ |   | ✓ | ✓ | ✓ | ✓ | ✓ | ✓ | ✓ |
| <b>S659</b>       | ✓ |   | ✓ | ✓ | ✓ | ✓ | ✓ | ✓ |   |
| <b>T1076</b>      | ✓ | ✓ |   | ✓ | ✓ | ✓ | ✓ | ✓ |   |
| <b>T1077</b>      | ✓ | ✓ |   | ✓ | ✓ | ✓ | ✓ | ✓ |   |
| <b>S1097</b>      | ✓ | ✓ |   | ✓ | ✓ | ✓ | ✓ | ✓ |   |
| <b>S1100</b>      | ✓ | ✓ |   | ✓ | ✓ | ✓ | ✓ | ✓ |   |

<sup>1</sup> Methods used for identification of *O*-glycosylation.

<sup>2</sup> Criteria used for characterization of *O*-glycopeptides.

<sup>3</sup> The requisite criterion for determination of *O*-glycosites.

## **Methods**

### **Expression constructs**

The codon-optimized cDNA for the full-length wild type spike (S) protein (Uniprot: P0DTC2-1) was synthesized by the Genewiz Company (China, Beijing). S with a C-terminal Twin-Strep-Tag II (WSHPQFEKGGG SGGGSGGSAWSHPQFEK) was cloned into a mammalian cell expression vector, pCAGGS. All point mutations were introduced using mutagenic primers. The sequences of all the constructs were verified prior to cell transfection and protein purification.

### **Expression and purification of the recombinant proteins**

The HEK 293T cells were cultured in Dulbecco's modified eagle medium (DMEM) with 10% fetal bovine serum (FBS) (Thermo Fisher Scientific) in 150 mm×25 mm dishes at 37°C with 5% CO<sub>2</sub>. When the cells reached approximately 70% confluence, they were transfected with plasmids encoding the S protein. For one dish of HEK293T cells, 60 µg of plasmids were premixed with 60 µg of polyethylenimines (PEIs) in 2 ml of fresh medium for 15 to 30 min. The mixture was then added into the cell culture followed by 4~6 h of incubation. The cells were washed with PBS two times and cultured with fresh DMEM medium. For the purification of the full-length S protein, cells were harvested 4~5 days after transfection and resuspended in a lysis buffer containing 20 mM Tris, pH 8.0, 200 mM NaCl, 10% glycerol, and 1 mM phenylmethylsulfonyl fluoride (PMSF). The suspension was homogenized with an ATS homogenizer. The lysate was centrifuged at 200000 g for 80 min at 4°C. The membrane



fraction was resuspended in a buffer containing 20 mM Tris, pH 8.0, 200 mM NaCl, 10% glycerol, 0.2 mM PMSF, and 1% Triton X-100. After incubation at 4°C for 1 h, the suspension was clarified using an ultracentrifuge for 30 min. The supernatant was collected and loaded onto a Strep-Tactin column. After washing with a buffer containing 20 mM Tris, pH 8.0, 200 mM NaCl, 10% glycerol, and 0.05% Triton X-100, the proteins were eluted with a wash buffer plus 5 mM of D-Desthiobiotin. The eluent was concentrated using a 50-kDa cut-off Centricon and further purified using a Superose-6 Increase column (GE Healthcare) in a buffer containing 20 mM Tris, pH 8.0, 50 mM NaCl, and 0.01% Triton X-100. The fractions were analyzed by SDS-PAGE and verified using western blot. The peak fractions corresponding to the S protein were pooled and concentrated to approximately 0.5 mg/ml.

### **Recombinant purified S protein preparation for mass spectrometry analysis**

50 µg of purified SARS-CoV-2 S protein was denatured for 1h in 50 mM Tris/HCl, pH 8.0 containing 6 M of urea and 5 mM dithiothreitol (DTT). Next, the S protein was reduced and alkylated by adding 20 mM iodoacetamide (IAA) and incubated for 1h in the dark, followed by a 1h incubation with 20 mM DTT to eliminate residual IAA. The alkylated S protein was buffer-exchanged into 50 mM Tris/HCl, pH 8.0 and digested separately overnight using LysC+Trypsin, chymotrypsin, GluC, elastase and a-lytic (Mass spectrum grade, Promega) at a ratio of 1:30 (w/w). Trypsin wasn't added until the pH was adjusted to 8.5 followed digested with LysC for 3 hours at pH 9.5, 37°C. The next day, the peptides were desalted using Monospin C18 column (GL Science,

Tokyo, Japan). The peptides were dried again, re-suspended in 0.1% formic acid water for *N*-linked glycan analysis. For *O*-linked glycan analysis, the five proteases-generated glycopeptides were treated with PNGase F prior to analysis to remove *N*-linked glycans.

### **SARS-CoV-2 virions preparation and Sample preparation for mass spectrometry analysis**

SARS-CoV-2 is isolated from a SARS-CoV-2-infected patient for candidate vaccine preparation was provided by the Chinese Center for Disease Control and Prevention. SARS-CoV-2 virions were propagated in Vero cells (ATCC CCL-81)[1]. Viruses were cultured in a 10 L basket bioreactor at the temperature of  $36 \pm 1^\circ\text{C}$ . The virus solution was harvested 48~72 h after inoculation and then was inactivated with  $\beta$ -propiolactone at a ratio of 1:4000 at  $2\sim 8^\circ\text{C}$  for 20~24 h, followed by chromatography purification.

All experiments involving infectious virus were conducted in approved biosafety level (BSL)-3 laboratory. Purification, concentration, biochemical analysis and sample preparation for electron microscopy of inactivated virions were carried out in a BSL-2 lab. To de-glycosylate S protein of virions, 20  $\mu\text{g}$  purified virions sample was treated with 5 units PNGase F (New England Biolabs) at  $37^\circ\text{C}$  for 1 hour. 20  $\mu\text{g}$  of treated and untreated samples were kept at  $100^\circ\text{C}$  for 15 min. De-glycosylation of S protein was characterized by 4 to 12% NuPAGE Bis-Tris gel (Invitrogen). The protein band was stained by silver stain (Thermo Fisher Scientific).

### **In-Gel Digestion**

Bands of interest were excised, cut into smaller pieces (1 mm x 1 mm), rinsed with water and 2 x 30 min washed in 50 mM ammonium bicarbonate at 37°C. The gel pieces were then shrunk in 100 % acetonitrile (ACN) and shaken for 5 min. Solvent was removed, and gel pieces rehydrated in 10 mM DTT in 50 mM AmBic, followed by 40 min incubation at 60 °C. The gel pieces were again shrunk in 100 % ACN and shaken for 30 min. Solvent was removed, and gel pieces rehydrated in 55 mM iodoacetamide in 50 mM AmBic, followed by 40 min incubation at room temperature. The gel pieces were again shrunk in 100 % ACN and shaken for 15 min. The solvent was removed, gel pieces briefly rinsed with 50 mM AmBic and rehydrated in a small volume (10 µL) of 50 mM AmBic supplemented with LysC-trypsin, chymotrypsin and  $\alpha$ -lytic at 37 °C for 18 hrs separately follow by PNGase F treatment at 37 °C for 4 hrs in O<sup>18</sup> water. Peptides were stage-tip purified as previously described, dried, and reconstituted in 10 µL of 0.1 % formic acid prior to analysis.

### **LC-MS analysis**

The peptides were first separated with a Thermo Scientific Ultimate 3000 RSLC nano LC system using trap-elute mode and then emitted into a Thermo Scientific Orbitrap Eclipse mass spectrometer (Thermo Fisher, San Jose).

Solvent A was 0.1% formic acid in water, while solvent B was 0.1% formic acid in 80% acetonitrile. After loading for 3 min with a flow rate of 10 µL/min in the trap column (Thermo Scientific™ Acclaim™ PepMap™ 100 C18, 75µm\*2cm, 3µm, 100Å), all of the peptides were further eluted in the analytical column (Thermo Scientific™

Acclaim™ PepMap™ 100 C18, 75µm\*25cm, 2µm, 100Å) with a flow rate of 250 nL/min using a gradient of 8% to 30% B for 127 min and 30% to 90% B for 16 min. This was followed by a 14 min washing step and a 10 min column equilibration step. To achieve “on the fly” glycopeptide identification, the stepped collision energy (SCE) HCD and HCDpdEThcD fragmentation method was employed for the data acquisition. The full scan mass spectra were recorded in positive ion mode over a scan range from 350 to 2000 m/z with a 60000 resolution (at 200 m/z). The AGC target and maximum injection time was set to 4e5 and 50 ms. A top 3 s setting was used for the dd-MS2 scan with a 30 s dynamic exclusion. The product dependent EThcD was triggered on the same precursor ion of HCD fragmentation with a 1.6 Da isolation window if one of the specific masses (204.0867, 138.0545, 366.1396, 243.026, 126.0551, 144.0655, 168.0655, 186.0761) was hit in the HCD spectra (30% NCE, 30000 resolution). Calibrated charge-dependent ETD parameters and 27% NCE HCD supplemental activation was used to obtain the EThcD spectra with resolution set to 30000 (at 200 m/z), AGC target set to 4e5, and maximum injection time set to 200 ms. The HCD collisional energy was applied with 10%, 15%, 20%, 25%, 30% and 35%. The stepped collisional energy (SCE) was set at 20%, 25% and 30% (+/- 10%).

### **Data analysis**

The glycopeptide fragmentation data were extracted from the raw file using Byonic™ (Version 3.8.13) and Byologic<sup>R</sup> software (Version 3.8-11-x64; Protein Metrics Inc.) with the mass tolerance for the precursors and fragment ions set at ±15 and ±20 ppm,

respectively. Two missed cleavage sites were subjected to all enzyme digestion. The fixed modification was carbamidomethyl (C), the variable modifications included oxidation (M), and additional deamidation (+0.984016N) for O<sup>16</sup> H<sub>2</sub>O and deamidation (+2.988261N) for O<sup>18</sup> H<sub>2</sub>O, was added for the O glycosite search. In addition, the Protein Metrics 78 *O*-linked glycan library and 309 *N*-linked glycan library were specified as *O*-glycan modifications for the intact *O*-glycopeptides and the *N*-glycan modifications for the intact *N*-glycopeptides. A 1% false discovery rate (FDR) was applied. For the *N*-glycosylation identification, in addition to the NxS/T motif, the variable modification at any N was set in the modification panel and the 309 *N*-linked glycan library was used.

Four criteria were used for the characterization of *O*-glycopeptides: 1) the MS/MS spectra contains glycan or oxonium ion (i.e. feature B ions); 2) the MS/MS spectra contains feature Y ions; 3) isotope distribution of precursor is reasonable; and 4) the retention time of glycopeptides and un-glycopeptides is comparable. Peptide score was set at 150 and 200 for filtering *O*- and *N*-glycopeptides, respectively. The relative amounts of each *O*-glycosites were calculated by comparing the extracted chromatographic areas of glycosylated peptides to the total peptides containing the modified glycosites. All charge states for a single glycopeptide were summed. Furthermore, all of the glycopeptide-spectrum matches (GPSMs) must be manually examined in order to select the valid *O*-glycopeptides for the glycosites analysis. Diagnostic ions were used as the requisite criterion for the *O*-glycosites determination.

1. Wang, H., et al., *Development of an Inactivated Vaccine Candidate, BBIBP-CorV, with Potent Protection against SARS-CoV-2*. Cell, 2020. **182**(3): p. 713-721 e9.
